# Supplementary material for: An in vitro test system for evaluation of SCAP–SREBP pathway inhibitory activities of Traditional Chinese Medicines
Source: Royal Society of Chemistry journal article supplement (doi:10.1039/c7ra09521j), 2017-01-01
Supplement: c7ra09521j1.zip [file c7ra09521j1.zip]

## Sheet: Sheet1
Disease ID	Disorder name	Gene symbols	OMIM ID	Chromosome	Class	Name in Simplified Chinese	Name in Traditional Chinese	Name in latin	Traditional Chinese medicine Class
27	Achondrogenesis Ib, 600972 (3)	SLC26A2, DTD, DTDST, D5S1708, EDM4	606718	5q32-q33.1	Bone	土鳖虫	土鱉蟲	Ground Beetle	blood-activating trauma-curing medicinal
26	Achondrogenesis-hypochondrogenesis, type II, 200610 (3)	COL2A1	120140	12q13.11-q13.2	Bone	地鳖	地鱉	Eupolyphaga sinensis	blood-activating trauma-curing medicinal
99	Amelogenesis imperfecta 2, hypoplastic local, 104500 (3)	ENAM	606585	4q21	Bone	血竭	血竭	Daemonorops draco	blood-activating trauma-curing medicinal
99	Amelogenesis imperfecta, 301200 (3)	AMELX, AMG, AIH1, AMGX	300391	Xp22.3-p22.1	Bone	儿茶	兒茶	Cutch Black Catechu	blood-activating trauma-curing medicinal
99	Amelogenesis imperfecta, hypomaturation-hypoplastic type, with taurodontism, 104510 (3)	DLX3, TDO	600525	17q21.3-q22	Bone	苏木	蘇木	Caesalpinia sappan	blood-activating trauma-curing medicinal
99	Amelogenesis imperfecta, hypoplastic, and openbite malocclusion, 608563 (3)	ENAM	606585	4q21	Bone	刘寄奴	劉寄奴	Siphonostegiae Herba	blood-activating trauma-curing medicinal
99	Amelogenesis imperfecta, pigmented hypomaturation type, 204700 (3)	KLK4, EMSP1, PRSS17	603767	19q13.3-q13.4	Bone	奇蒿	奇蒿	Artemisia anomala	blood-activating trauma-curing medicinal
137	Apparent mineralocorticoid excess, hypertension due to (3)	HSD11B2, HSD11K	218030	16q22	Bone	骨碎补	骨碎補	Drynaria fortunei	blood-activating trauma-curing medicinal
147	Arthropathy, progressive pseudorheumatoid, of childhood, 208230 (3)	WISP3, PPAC, PPD	603400	6q22-q23	Bone	水红花子	水紅花子	Polygonum orientale	blood-activating trauma-curing medicinal
217	Bone mineral density variability 1, 601884 (3)	LRP5, BMND1, LRP7, LR3, OPPG, VBCH2	603506	11q13.4	Bone	马钱子	馬錢子	Strychnos nux-vomica	blood-activating trauma-curing medicinal
254	Calcinosis, tumoral, 211900 (3)	FGF23, ADHR, HPDR2, PHPTC	605380	12p13.3	Bone	马钱	馬錢	Strychnosn nux-vomica	blood-activating trauma-curing medicinal
254	Calcinosis, tumoral, 211900 (3)	GALNT3	601756	2q24-q31	Bone	马钱子	馬錢子	Strychnos nux-vomica L.	blood-activating trauma-curing medicinal
382	Craniometaphyseal dysplasia, 123000 (3)	ANKH, HANK, ANK, CMDJ, CCAL2, CPPDD	605145	5p15.2-p14.1	Bone	莪术	莪朮	Zedoray Rhizome	blood-activating trauma-curing medicinal
417	Dentin dysplasia, type II, 125420 (3)	DSPP, DPP, DGI1, DFNA39, DTDP2	125485	4q21.3	Bone	温郁金	溫鬱金	Curcuma wenyujin	blood-breaking mass-eliminating medicinal
418	Dentinogenesis imperfecta, Shields type II, 125490 (3)	DSPP, DPP, DGI1, DFNA39, DTDP2	125485	4q21.3	Bone	广西莪术	廣西莪术	Curcuma kwangsiensis	blood-breaking mass-eliminating medicinal
418	Dentinogenesis imperfecta, Shields type III, 125500 (3)	DSPP, DPP, DGI1, DFNA39, DTDP2	125485	4q21.3	Bone	三棱	三棱	Sparganium stoloniferum	blood-breaking mass-eliminating medicinal
496	Epiphyseal dysplasia, multiple 1, 132400 (3)	COMP, EDM1, MED, PSACH	600310	19p13.1	Bone	班蟊	班蟊	Blister Beetle	blood-breaking mass-eliminating medicinal
496	Epiphyseal dysplasia, multiple, 226900 (3)	SLC26A2, DTD, DTDST, D5S1708, EDM4	606718	5q32-q33.1	Bone	斑蟊	斑蟊	Mylabris phalerata	blood-breaking mass-eliminating medicinal
496	Epiphyseal dysplasia, multiple, 3, 600969 (3)	COL9A3, EDM3, IDD	120270	20q13.3	Bone	三棱	三棱	Sparganium stoloniferum Buch.-Ham.	blood-breaking mass-eliminating medicinal
496	Epiphyseal dysplasia, multiple, 5, 607078 (3)	MATN3, EDM5, HOA	602109	2p24-p23	Bone	穿山甲	穿山甲	Manis pentadactyla Linnaeus	blood-breaking mass-eliminating medicinal
496	Epiphyseal dysplasia, multiple, COL9A1-related (3)	COL9A1, MED	120210	6q13	Bone	土鳖虫	土鱉蟲	Ground Beetle	blood-breaking mass-eliminating medicinal
496	Epiphyseal dysplasia, multiple, type 2, 600204 (3)	COL9A2, EDM2	120260	1p33-p32.2	Bone	地鳖	地鱉	Eupolyphaga sinensis
496	Epiphyseal dysplasia, multiple, with myopathy (3)	COL9A3, EDM3, IDD	120270	20q13.3	Bone	血竭	血竭	Daemonorops draco
514	Exostoses, multiple, type 1, 133700 (3)	EXT1	608177	8q24.11-q24.13	Bone	儿茶	兒茶	Cutch Black Catechu
514	Exostoses, multiple, type 2, 133701 (3)	EXT2	608210	11p12-p11	Bone	苏木	蘇木	Caesalpinia sappan
615	Gnthodiaphyseal dysplasia, 166260 (3)	TMEM16E, GDD1	608662	11p14.3	Bone	刘寄奴	劉寄奴	Siphonostegiae Herba
741	Hyperostosis, endosteal, 144750 (3)	LRP5, BMND1, LRP7, LR3, OPPG, VBCH2	603506	11q13.4	Bone	奇蒿	奇蒿	Artemisia anomala
784	Hypophosphatemic rickets, autosomal dominant, 193100 (3)	FGF23, ADHR, HPDR2, PHPTC	605380	12p13.3	Bone	骨碎补	骨碎補	Drynaria fortunei
1075	Nasu-Hakola disease, 221770 (3)	TREM2	605086	6p21.2	Bone	水红花子	水紅花子	Polygonum orientale
1075	Nasu-Hakola disease, 221770 (3)	TYROBP, PLOSL, DAP12	604142	19q13.1	Bone	马钱子	馬錢子	Strychnos nux-vomica
1136	Odontohypophosphatasia, 146300 (3)	ALPL, HOPS, TNSALP	171760	1p36.1-p34	Bone	马钱	馬錢	Strychnosn nux-vomica
1151	OSMED syndrome, 215150 (3)	COL11A2, STL3, DFNA13	120290	6p21.3	Bone	马钱子	馬錢子	Strychnos nux-vomica L.
1152	Osseous heteroplasia, progressive, 166350 (3)	GNAS, GNAS1, GPSA, POH, PHP1B, PHP1A, AHO	139320	20q13.2	Bone	莪术	莪朮	Zedoray Rhizome
1156	Osteogenesis imperfecta, 3 clinical forms, 166200, 166210, 259420 (3)	COL1A2	120160	7q22.1	Bone	温郁金	溫鬱金	Curcuma wenyujin
1156	Osteogenesis imperfecta, type I, 166200 (3)	COL1A1	120150	17q21.31-q22	Bone	广西莪术	廣西莪术	Curcuma kwangsiensis
1156	Osteogenesis imperfecta, type II, 166210 (3)	COL1A1	120150	17q21.31-q22	Bone	三棱	三棱	Sparganium stoloniferum
1156	Osteogenesis imperfecta, type III, 259420 (3)	COL1A1	120150	17q21.31-q22	Bone	班蟊	班蟊	Blister Beetle
1156	Osteogenesis imperfecta, type IV, 166220 (3)	COL1A1	120150	17q21.31-q22	Bone	斑蟊	斑蟊	Mylabris phalerata
1157	Osteolysis, familial expansile, 174810 (3)	TNFRSF11A, RANK, ODFR, OFE	603499	18q22.1	Bone	三棱	三棱	Sparganium stoloniferum Buch.-Ham.
1157	Osteolysis, idiopathic, Saudi type, 605156 (3)	MMP2, CLG4A, MONA	120360	16q13	Bone	穿山甲	穿山甲	Manis pentadactyla Linnaeus
1161	Osteopetrosis, autosomal dominant, type I, 607634 (3)	LRP5, BMND1, LRP7, LR3, OPPG, VBCH2	603506	11q13.4	Bone	土鳖虫	土鱉蟲	Ground Beetle
1161	Osteopetrosis, autosomal dominant, type II, 166600 (3)	CLCN7, CLC7, OPTA2	602727	16p13	Bone	地鳖	地鱉	Eupolyphaga sinensis
1161	Osteopetrosis, autosomal recessive, 259700 (3)	OSTM1, GL	607649	6q21	Bone	血竭	血竭	Daemonorops draco
1161	Osteopetrosis, recessive, 259700 (3)	CLCN7, CLC7, OPTA2	602727	16p13	Bone	儿茶	兒茶	Cutch Black Catechu
1161	Osteopetrosis, recessive, 259700 (3)	TCIRG1, TIRC7, OC116, OPTB1	604592	11q13.4-q13.5	Bone	苏木	蘇木	Caesalpinia sappan
1162	Osteopoikilosis, 166700 (3)	LEMD3, MAN1	607844	12q14	Bone	刘寄奴	劉寄奴	Siphonostegiae Herba
1163	Osteoporosis (3)	CALCA, CALC1	114130	11p15.2-p15.1	Bone	奇蒿	奇蒿	Artemisia anomala
1163	Osteoporosis, 166710 (3)	COL1A1	120150	17q21.31-q22	Bone	骨碎补	骨碎補	Drynaria fortunei
1163	Osteoporosis, 166710 (3)	LRP5, BMND1, LRP7, LR3, OPPG, VBCH2	603506	11q13.4	Bone	水红花子	水紅花子	Polygonum orientale
1163	Osteoporosis, hypophosphatemic, (3)	SLC17A2, NPT2	182309	5q35	Bone	马钱子	馬錢子	Strychnos nux-vomica
1163	Osteoporosis, idiopathic, 166710 (3)	COL1A2	120160	7q22.1	Bone	马钱	馬錢	Strychnosn nux-vomica
1163	Osteoporosis, postmenopausal, susceptibility, 166710 (3)	CALCR, CRT	114131	7q21.3	Bone	马钱子	馬錢子	Strychnos nux-vomica L.
1165	Osteoporosis, susceptibility to, 166710 (3)	RIL	603422	5q31.1	Bone	莪术	莪朮	Zedoray Rhizome
1164	Osteoporosis-pseudoglioma syndrome, 259770 (3)	LRP5, BMND1, LRP7, LR3, OPPG, VBCH2	603506	11q13.4	Bone	温郁金	溫鬱金	Curcuma wenyujin
1173	Paget disease of bone, 602080 (3)	SQSTM1, P62, PDB3	601530	5q35	Bone	广西莪术	廣西莪术	Curcuma kwangsiensis
1173	Paget disease of bone, 602080 (3)	TNFRSF11A, RANK, ODFR, OFE	603499	18q22.1	Bone	三棱	三棱	Sparganium stoloniferum
1173	Paget disease, juvenile, 239000 (3)	TNFRSF11B, OPG, OCIF	602643	8q24	Bone	班蟊	班蟊	Blister Beetle
1284	Pseudovitamin D deficiency rickets 1 (3)	CYP27B1, PDDR, VDD1	264700	12q14	Bone	斑蟊	斑蟊	Mylabris phalerata
1330	Rickets due to defect in vitamin D 25-hydroxylation, 600081 (3)	CYP2R1	608713	11p15.2	Bone	三棱	三棱	Sparganium stoloniferum Buch.-Ham.
1330	Rickets, vitamin D-resistant, type IIA, 277440 (3)	VDR	601769	12q12-q14	Bone	穿山甲	穿山甲	Manis pentadactyla Linnaeus
1330	Rickets, vitamin D-resistant, type IIB, 277420 (3)	VDR	601769	12q12-q14	Bone	三棱	三棱	Sparganium stoloniferum Buch.-Ham.
1600	Wolcott-Rallison syndrome, 226980 (3)	EIF2AK3, PEK, PERK, WRS	604032	2p12	Bone	穿山甲	穿山甲	Manis pentadactyla Linnaeus
22	Accelerated tumor formation, susceptibility to (3)	MDM2	164785	12q14.3-q15	Cancer	截虐药	截虐藥	anti-malaria medicinal
45	Adenocarcinoma of lung, response to tyrosine kinase inhibitor in, 211980 (3)	EGFR	131550	7p12.3-p12.1	Cancer	马鞭草	馬鞭草	Verbena officinalis L.
45	Adenocarcinoma of lung, somatic, 211980 (3)	BRAF	164757	7q34	Cancer	截虐药	截虐藥	anti-malaria medicinal
45	Adenocarcinoma of lung, somatic, 211980 (3)	ERBB2, NGL, NEU, HER2	164870	17q21.1	Cancer	马鞭草	馬鞭草	Verbena officinalis L.
45	Adenocarcinoma of lung, somatic, 211980 (3)	PRKN, PARK2, PDJ	602544	6q25.2-q27	Cancer	截虐药	截虐藥	anti-malaria medicinal
45	Adenocarcinoma, ovarian, somatic (3)	PRKN, PARK2, PDJ	602544	6q25.2-q27	Cancer	马鞭草	馬鞭草	Verbena officinalis L.
46	Adenoma, periampullary (3)	APC, GS, FPC	175100	5q21-q22	Cancer	截虐药	截虐藥	anti-malaria medicinal
47	Adenomas, multiple colorectal, 608456 (3)	MUTYH	604933	1p34.3-p32.1	Cancer	马鞭草	馬鞭草	Verbena officinalis L.
47	Adenomas, salivary gland pleomorphic, 181030 (3)	PLAG1, SGPA, PSA	603026	8q12	Cancer	截虐药	截虐藥	anti-malaria medicinal
47	Adenomatous polyposis coli (3)	APC, GS, FPC	175100	5q21-q22	Cancer	马鞭草	馬鞭草	Verbena officinalis L.
47	Adenomatous polyposis coli, attenuated (3)	APC, GS, FPC	175100	5q21-q22	Cancer	截虐药	截虐藥	anti-malaria medicinal
2053	Adrenal adenoma, sporadic (3)	MEN1	131100	11q13	Cancer	截虐药	截虐藥	anti-malaria medicinal
2054	Adrenal cortical carcinoma, 202300 (3)	TP53, P53, LFS1	191170	17p13.1	Cancer	马鞭草	馬鞭草	Verbena officinalis L.
54	Adrenocortical tumor, somatic (3)	PRKAR1A, TSE1, CNC1, CAR	188830	17q23-q24	Cancer	截虐药	截虐藥	anti-malaria medicinal
97	Alveolar soft-part sarcoma, 606243 (3)	ASPCR1, RCC17, ASPL, ASPS	606236	17q25	Cancer	马鞭草	馬鞭草	Verbena officinalis L.
188	Basal cell carcinoma (3)	RASA1, GAP, CMAVM, PKWS	139150	5q13.3	Cancer	截虐药	截虐藥	anti-malaria medicinal
188	Basal cell carcinoma, somatic, 605462 (3)	PTCH2	603673	1p32	Cancer	马鞭草	馬鞭草	Verbena officinalis L.
188	Basal cell carcinoma, somatic, 605462 (3)	PTCH, NBCCS, BCNS, HPE7	601309	9q22.3	Cancer	截虐药	截虐藥	anti-malaria medicinal
188	Basal cell carcinoma, sporadic (3)	SMOH, SMO	601500	7q31-q32	Cancer	马鞭草	馬鞭草	Verbena officinalis L.
190	B-cell non-Hodgkin lymphoma, high-grade (3)	BCL7A, BCL7	601406	12q24.1	Cancer	截虐药	截虐藥	anti-malaria medicinal
207	Bladder cancer, 109800 (3)	FGFR3, ACH	134934	4p16.3	Cancer	截虐药	截虐藥	anti-malaria medicinal
207	Bladder cancer, 109800 (3)	KRAS2, RASK2	190070	12p12.1	Cancer	马鞭草	馬鞭草	Verbena officinalis L.
207	Bladder cancer, 109800 (3)	RB1	180200	13q14.1-q14.2	Cancer	截虐药	截虐藥	anti-malaria medicinal
207	Bladder cancer, somatic, 109800 (3)	HRAS	190020	11p15.5	Cancer	马鞭草	馬鞭草	Verbena officinalis L.
213	Bloom syndrome, 210900 (3)	RECQL3, RECQ2, BLM, BS	604610	15q26.1	Cancer	截虐药	截虐藥	anti-malaria medicinal
228	Breast and colorectal cancer, susceptibility to (3)	CHEK2, RAD53, CHK2, CDS1, LFS2	604373	22q12.1	Cancer	马鞭草	馬鞭草	Verbena officinalis L.
228	Breast cancer (3)	TSG101	601387	11p15.2-p15.1	Cancer	截虐药	截虐藥	anti-malaria medicinal
228	Breast cancer 2, early onset (3)	BRCA2, FANCD1	600185	13q12.3	Cancer	马鞭草	馬鞭草	Verbena officinalis L.
228	Breast cancer, 114480 (3)	PIK3CA	171834	3q26.3	Cancer	截虐药	截虐藥	anti-malaria medicinal
228	Breast cancer, 114480 (3)	PPM1D, WIP1	605100	17q22-q23	Cancer	截虐药	截虐藥	anti-malaria medicinal
228	Breast cancer, 114480 (3)	SLC22A1L, BWSCR1A, IMPT1	602631	11p15.5	Cancer	马鞭草	馬鞭草	Verbena officinalis L.
228	Breast cancer, 114480 (3)	TP53, P53, LFS1	191170	17p13.1	Cancer	截虐药	截虐藥	anti-malaria medicinal
228	Breast cancer, early-onset, 114480 (3)	BRIP1, BACH1, FANCJ	605882	17q22	Cancer	马鞭草	馬鞭草	Verbena officinalis L.
228	Breast cancer, invasive intraductal (3)	RAD54L, HR54, HRAD54	603615	1p32	Cancer	截虐药	截虐藥	anti-malaria medicinal
228	Breast cancer, lobular (3)	CDH1, UVO	192090	16q22.1	Cancer	马鞭草	馬鞭草	Verbena officinalis L.
228	Breast cancer, male, susceptibility to, 114480 (3)	BRCA2, FANCD1	600185	13q12.3	Cancer	截虐药	截虐藥	anti-malaria medicinal
228	Breast cancer, male, with Reifenstein syndrome (3)	AR, DHTR, TFM, SBMA, KD, SMAX1	313700	Xq11-q12	Cancer	马鞭草	馬鞭草	Verbena officinalis L.
228	Breast cancer, somatic, 114480 (3)	KRAS2, RASK2	190070	12p12.1	Cancer	截虐药	截虐藥	anti-malaria medicinal
228	Breast cancer, somatic, 114480 (3)	RB1CC1, CC1, KIAA0203	606837	8q11	Cancer	截虐药	截虐藥	anti-malaria medicinal
228	Breast cancer, sporadic (3)	PHB	176705	17q21	Cancer	马鞭草	馬鞭草	Verbena officinalis L.
228	Breast cancer, susceptibility to (3)	XRCC3	600675	14q32.3	Cancer	截虐药	截虐藥	anti-malaria medicinal
228	Breast cancer, susceptibility to, 114480 (3)	ATM, ATA, AT1	607585	11q22.3	Cancer	马鞭草	馬鞭草	Verbena officinalis L.
228	Breast cancer, susceptibility to, 114480 (3)	BARD1	601593	2q34-q35	Cancer	截虐药	截虐藥	anti-malaria medicinal
228	Breast cancer, susceptibility to, 114480 (3)	CHEK2, RAD53, CHK2, CDS1, LFS2	604373	22q12.1	Cancer	马鞭草	馬鞭草	Verbena officinalis L.
228	Breast cancer, susceptibility to, 114480 (3)	RAD51A, RECA	179617	15q15.1	Cancer	截虐药	截虐藥	anti-malaria medicinal
228	Breast cancer-1 (3)	BRCA1, PSCP	113705	17q21	Cancer	马鞭草	馬鞭草	Verbena officinalis L.
228	Breast-ovarian cancer (3)	BRCA1, PSCP	113705	17q21	Cancer	截虐药	截虐藥	anti-malaria medicinal
237	Burkitt lymphoma, 113970 (3)	MYC	190080	8q24.12-q24.13	Cancer	截虐药	截虐藥	anti-malaria medicinal
252	Cafe-au-lait spots with glioma or leukemia, 114030 (3)	MLH1, COCA2, HNPCC2	120436	3p21.3	Cancer	马鞭草	馬鞭草	Verbena officinalis L.
252	Cafe-au-lait spots, multiple, with leukemia, 114030 (3)	MSH2, COCA1, FCC1, HNPCC1	609309	2p22-p21	Cancer	截虐药	截虐藥	anti-malaria medicinal
259	Cancer progression/metastasis (3)	FGFR4	134935	5q35.1-qter	Cancer	马鞭草	馬鞭草	Verbena officinalis L.
259	Cancer susceptibility (3)	MSH6, GTBP, HNPCC5	600678	2p16	Cancer	截虐药	截虐藥	anti-malaria medicinal
2265	Carcinoid tumor of lung (3)	MEN1	131100	11q13	Cancer	马鞭草	馬鞭草	Verbena officinalis L.
265	Carcinoid tumors, intestinal, 114900 (3)	SDHD, PGL1	602690	11q23	Cancer	截虐药	截虐藥	anti-malaria medicinal
298	Cervical cancer, somatic, 603956 (3)	FGFR3, ACH	134934	4p16.3	Cancer	马鞭草	馬鞭草	Verbena officinalis L.
316	Chondrosarcoma, 215300 (3)	EXT1	608177	8q24.11-q24.13	Cancer	截虐药	截虐藥	anti-malaria medicinal
316	Chondrosarcoma, extraskeletal myxoid (3)	CSMF	600542	9q22	Cancer	截虐药	截虐藥	anti-malaria medicinal
316	Chondrosarcoma, extraskeletal myxoid (3)	EWSR1, EWS	133450	22q12	Cancer	马鞭草	馬鞭草	Verbena officinalis L.
346	Colon adenocarcinoma (3)	RAD54B	604289	8q21.3-q22	Cancer	截虐药	截虐藥	anti-malaria medicinal
346	Colon adenocarcinoma (3)	RAD54L, HR54, HRAD54	603615	1p32	Cancer	马鞭草	馬鞭草	Verbena officinalis L.
346	Colon cancer (3)	BCL10	603517	1p22	Cancer	截虐药	截虐藥	anti-malaria medicinal
346	Colon cancer (3)	PTPN12, PTPG1	600079	7q11.23	Cancer	马鞭草	馬鞭草	Verbena officinalis L.
346	Colon cancer (3)	TGFBR2, HNPCC6	190182	3p22	Cancer	截虐药	截虐藥	anti-malaria medicinal
346	Colon cancer, advanced (3)	SRC, ASV, SRC1	190090	20q12-q13	Cancer	马鞭草	馬鞭草	Verbena officinalis L.
346	Colon cancer, hereditary nonpolypopsis, type 7 (3)	MLH3, HNPCC7	604395	14q24.3	Cancer	截虐药	截虐藥	anti-malaria medicinal
346	Colon cancer, somatic, 114500 (3)	PTPRJ, DEP1	600925	11p11.2	Cancer	截虐药	截虐藥	anti-malaria medicinal
346	Colonic adenoma recurrence, reduced risk of, 114500 (3)	ODC1	165640	2p25	Cancer	马鞭草	馬鞭草	Verbena officinalis L.
346	Colorectal adenomatous polyposis, autosomal recessive, with pilomatricomas, 132600 (3)	MUTYH	604933	1p34.3-p32.1	Cancer	截虐药	截虐藥	anti-malaria medicinal
346	Colorectal cancer (3)	APC, GS, FPC	175100	5q21-q22	Cancer	马鞭草	馬鞭草	Verbena officinalis L.
346	Colorectal cancer (3)	BAX	600040	19q13.3-q13.4	Cancer	截虐药	截虐藥	anti-malaria medicinal
346	Colorectal cancer (3)	CTNNB1	116806	3p22-p21.3	Cancer	马鞭草	馬鞭草	Verbena officinalis L.
346	Colorectal cancer (3)	DCC	120470	18q21.3	Cancer	截虐药	截虐藥	anti-malaria medicinal
346	Colorectal cancer (3)	MCC	159350	5q21	Cancer	马鞭草	馬鞭草	Verbena officinalis L.
346	Colorectal cancer (3)	NRAS	164790	1p13.2	Cancer	截虐药	截虐藥	anti-malaria medicinal
346	Colorectal cancer with chromosomal instability (3)	BUB1	602452	2q14	Cancer	截虐药	截虐藥	anti-malaria medicinal
346	Colorectal cancer, 114500 (3)	AXIN2	604025	17q24	Cancer	马鞭草	馬鞭草	Verbena officinalis L.
346	Colorectal cancer, 114500 (3)	BUB1B, BUBR1	602860	15q15	Cancer	截虐药	截虐藥	anti-malaria medicinal
346	Colorectal cancer, 114500 (3)	EP300	602700	22q13	Cancer	截虐药	截虐藥	anti-malaria medicinal
346	Colorectal cancer, 114500 (3)	PDGFRL, PDGRL, PRLTS	604584	8p22-p21.3	Cancer	马鞭草	馬鞭草	Verbena officinalis L.
346	Colorectal cancer, 114500 (3)	PIK3CA	171834	3q26.3	Cancer	截虐药	截虐藥	anti-malaria medicinal
346	Colorectal cancer, 114500 (3)	TP53, P53, LFS1	191170	17p13.1	Cancer	马鞭草	馬鞭草	Verbena officinalis L.
346	Colorectal cancer, hereditary nonpolyposis, type 1, 120435 (3)	MSH2, COCA1, FCC1, HNPCC1	609309	2p22-p21	Cancer	截虐药	截虐藥	anti-malaria medicinal
346	Colorectal cancer, hereditary nonpolyposis, type 2, 609310 (3)	MLH1, COCA2, HNPCC2	120436	3p21.3	Cancer	马鞭草	馬鞭草	Verbena officinalis L.
346	Colorectal cancer, hereditary nonpolyposis, type 3 (3)	PMS1, PMSL1, HNPCC3	600258	2q31-q33	Cancer	截虐药	截虐藥	anti-malaria medicinal
346	Colorectal cancer, hereditary nonpolyposis, type 4 (3)	PMS2, PMSL2, HNPCC4	600259	7p22	Cancer	马鞭草	馬鞭草	Verbena officinalis L.
346	Colorectal cancer, hereditary nonpolyposis, type 5 (3)	MSH6, GTBP, HNPCC5	600678	2p16	Cancer	截虐药	截虐藥	anti-malaria medicinal
346	Colorectal cancer, hereditary nonpolyposis, type 6 (3)	TGFBR2, HNPCC6	190182	3p22	Cancer	截虐药	截虐藥	anti-malaria medicinal
346	Colorectal cancer, somatic (3)	BRAF	164757	7q34	Cancer	马鞭草	馬鞭草	Verbena officinalis L.
346	Colorectal cancer, somatic (3)	DLC1	604258	8p22-p21.3	Cancer	截虐药	截虐藥	anti-malaria medicinal
346	Colorectal cancer, somatic, 109800 (3)	FGFR3, ACH	134934	4p16.3	Cancer	马鞭草	馬鞭草	Verbena officinalis L.
346	Colorectal cancer, somatic, 114500 (3)	FLCN, BHD	607273	17p11.2	Cancer	截虐药	截虐藥	anti-malaria medicinal
346	Colorectal cancer, somatic, 114500 (3)	MLH3, HNPCC7	604395	14q24.3	Cancer	马鞭草	馬鞭草	Verbena officinalis L.
346	Colorectal cancer, sporadic, 114500 (3)	PLA2G2A, PLA2B, PLA2L, MOM1	172411	1p35	Cancer	截虐药	截虐藥	anti-malaria medicinal
346	Colorectal cancer, susceptibility to (3)	CCND1, PRAD1, BCL1	168461	11q13	Cancer	马鞭草	馬鞭草	Verbena officinalis L.
372	Cowden disease, 158350 (3)	PTEN, MMAC1	601728	10q23.31	Cancer	截虐药	截虐藥	anti-malaria medicinal
372	Cowden-like syndrome, 158350 (3)	BMPR1A, ACVRLK3, ALK3	601299	10q22.3	Cancer	截虐药	截虐藥	anti-malaria medicinal
422	Dermatofibrosarcoma protuberans (3)	PDGFB, SIS	190040	22q12.3-q13.1	Cancer	马鞭草	馬鞭草	Verbena officinalis L.
425	Desmoid disease, hereditary, 135290 (3)	APC, GS, FPC	175100	5q21-q22	Cancer	截虐药	截虐藥	anti-malaria medicinal
477	Enchondromatosis, Ollier type, 166000 (3)	PTHR1, PTHR	168468	3p22-p21.1	Cancer	马鞭草	馬鞭草	Verbena officinalis L.
479	Endometrial carcinoma (3)	CDH1, UVO	192090	16q22.1	Cancer	截虐药	截虐藥	anti-malaria medicinal
479	Endometrial carcinoma (3)	MSH3	600887	5q11-q12	Cancer	马鞭草	馬鞭草	Verbena officinalis L.
479	Endometrial carcinoma (3)	MSH6, GTBP, HNPCC5	600678	2p16	Cancer	截虐药	截虐藥	anti-malaria medicinal
479	Endometrial carcinoma (3)	PTEN, MMAC1	601728	10q23.31	Cancer	马鞭草	馬鞭草	Verbena officinalis L.
498	Epithelial ovarian cancer, somatic, 604370 (3)	OPCML	600632	11q25	Cancer	截虐药	截虐藥	anti-malaria medicinal
508	Esophageal cancer, 133239 (3)	TGFBR2, HNPCC6	190182	3p22	Cancer	截虐药	截虐藥	anti-malaria medicinal
508	Esophageal carcinoma, somatic, 133239 (3)	RNF6	604242	13q12.11	Cancer	马鞭草	馬鞭草	Verbena officinalis L.
508	Esophageal squamous cell carcinoma, 133239 (3)	LZTS1, F37, FEZ1	606551	8p22	Cancer	截虐药	截虐藥	anti-malaria medicinal
508	Esophageal squamous cell carcinoma, 133239 (3)	WWOX, FOR	605131	16q23.3-q24.1	Cancer	马鞭草	馬鞭草	Verbena officinalis L.
511	Ewing sarcoma (3)	EWSR1, EWS	133450	22q12	Cancer	截虐药	截虐藥	anti-malaria medicinal
571	Gardner syndrome (3)	APC, GS, FPC	175100	5q21-q22	Cancer	马鞭草	馬鞭草	Verbena officinalis L.
572	Gastric cancer risk after H. pylori infection, 137215 (3)	IL1B	147720	2q14	Cancer	截虐药	截虐藥	anti-malaria medicinal
572	Gastric cancer risk after H. pylori infection, 137215 (3)	IL1RN	147679	2q14.2	Cancer	马鞭草	馬鞭草	Verbena officinalis L.
572	Gastric cancer, 137215 (3)	APC, GS, FPC	175100	5q21-q22	Cancer	截虐药	截虐藥	anti-malaria medicinal
572	Gastric cancer, 137215 (3)	IRF1, MAR	147575	5q31.1	Cancer	截虐药	截虐藥	anti-malaria medicinal
572	Gastric cancer, familial diffuse, 137215 (3)	CDH1, UVO	192090	16q22.1	Cancer	马鞭草	馬鞭草	Verbena officinalis L.
572	Gastric cancer, somatic, 137215 (3)	CASP10, MCH4, ALPS2	601762	2q33-q34	Cancer	截虐药	截虐藥	anti-malaria medicinal
572	Gastric cancer, somatic, 137215 (3)	ERBB2, NGL, NEU, HER2	164870	17q21.1	Cancer	马鞭草	馬鞭草	Verbena officinalis L.
572	Gastric cancer, somatic, 137215 (3)	FGFR2, BEK, CFD1, JWS	176943	10q26	Cancer	截虐药	截虐藥	anti-malaria medicinal
572	Gastric cancer, somatic, 137215 (3)	KLF6, COPEB, BCD1, ZF9	602053	10p15	Cancer	马鞭草	馬鞭草	Verbena officinalis L.
572	Gastric cancer, somatic, 137215 (3)	MUTYH	604933	1p34.3-p32.1	Cancer	截虐药	截虐藥	anti-malaria medicinal
574	Gastrointestinal stromal tumor, somatic, 606764 (3)	KIT, PBT	164920	4q12	Cancer	马鞭草	馬鞭草	Verbena officinalis L.
574	Gastrointestinal stromal tumor, somatic, 606764 (3)	PDGFRA	173490	4q12	Cancer	截虐药	截虐藥	anti-malaria medicinal
580	Germ cell tumor (3)	BCL10	603517	1p22	Cancer	截虐药	截虐藥	anti-malaria medicinal
580	Germ cell tumors, 273300 (3)	KIT, PBT	164920	4q12	Cancer	马鞭草	馬鞭草	Verbena officinalis L.
583	Giant-cell fibroblastoma (3)	PDGFB, SIS	190040	22q12.3-q13.1	Cancer	截虐药	截虐藥	anti-malaria medicinal
590	Glioblastoma multiforme, somatic, 137800 (3)	DMBT1	601969	10q25.3-q26.1	Cancer	马鞭草	馬鞭草	Verbena officinalis L.
590	Glioblastoma, early-onset, 137800 (3)	MSH2, COCA1, FCC1, HNPCC1	609309	2p22-p21	Cancer	截虐药	截虐藥	anti-malaria medicinal
590	Glioblastoma, somatic, 137800 (3)	ERBB2, NGL, NEU, HER2	164870	17q21.1	Cancer	马鞭草	馬鞭草	Verbena officinalis L.
590	Glioblastoma, somatic, 137800 (3)	LGI1, EPT, ETL1	604619	10q24	Cancer	截虐药	截虐藥	anti-malaria medicinal
590	Glioblastoma, susceptibility to, 137800 (3)	PPARG, PPARG1, PPARG2	601487	3p25	Cancer	马鞭草	馬鞭草	Verbena officinalis L.
650	Hemangioblastoma, cerebellar, somatic (3)	VHL	608537	3p26-p25	Cancer	截虐药	截虐藥	anti-malaria medicinal
651	Hemangioma, capillary infantile, somatic, 602089 (3)	FLT4, VEGFR3, PCL	136352	5q35.3	Cancer	截虐药	截虐藥	anti-malaria medicinal
651	Hemangioma, capillary infantile, somatic, 602089 (3)	KDR	191306	4q12	Cancer	马鞭草	馬鞭草	Verbena officinalis L.
668	Hepatic adenoma, 142330 (3)	TCF1, HNF1A, MODY3	142410	12q24.2	Cancer	截虐药	截虐藥	anti-malaria medicinal
668	Hepatoblastoma (3)	CTNNB1	116806	3p22-p21.3	Cancer	马鞭草	馬鞭草	Verbena officinalis L.
668	Hepatocellular cancer, 114550 (3)	PDGFRL, PDGRL, PRLTS	604584	8p22-p21.3	Cancer	截虐药	截虐藥	anti-malaria medicinal
668	Hepatocellular carcinoma (3)	IGF2R, MPRI	147280	6q26	Cancer	马鞭草	馬鞭草	Verbena officinalis L.
668	Hepatocellular carcinoma, 114550 (3)	AXIN1, AXIN	603816	16p13.3	Cancer	截虐药	截虐藥	anti-malaria medicinal
668	Hepatocellular carcinoma, 114550 (3)	CTNNB1	116806	3p22-p21.3	Cancer	马鞭草	馬鞭草	Verbena officinalis L.
668	Hepatocellular carcinoma, 114550 (3)	TP53, P53, LFS1	191170	17p13.1	Cancer	截虐药	截虐藥	anti-malaria medicinal
668	Hepatocellular carcinoma, childhood type, 114550 (3)	MET	164860	7q31	Cancer	截虐药	截虐藥	anti-malaria medicinal
668	Hepatocellular carcinoma, somatic, 114550 (3)	CASP8, MCH5	601763	2q33-q34	Cancer	马鞭草	馬鞭草	Verbena officinalis L.
683	Histiocytoma (3)	TP53, P53, LFS1	191170	17p13.1	Cancer	截虐药	截虐藥	anti-malaria medicinal
833	Juvenile polyposis/hereditary hemorrhagic telangiectasia syndrome, 175050 (3)	MADH4, DPC4, SMAD4, JIP	600993	18q21.1	Cancer	马鞭草	馬鞭草	Verbena officinalis L.
878	Leiomyomatosis and renal cell cancer, 605839 (3)	FH	136850	1q42.1	Cancer	截虐药	截虐藥	anti-malaria medicinal
878	Leiomyomatosis, diffuse, with Alport syndrome, 308940 (3)	COL4A6	303631	Xq22.3	Cancer	马鞭草	馬鞭草	Verbena officinalis L.
886	Leukemia, acute lymphoblastic (3)	FLT3	136351	13q12	Cancer	截虐药	截虐藥	anti-malaria medicinal
886	Leukemia, acute lymphoblastic (3)	NBS1, NBS	602667	8q21	Cancer	马鞭草	馬鞭草	Verbena officinalis L.
886	Leukemia, acute lymphoblastic (3)	ZNFN1A1, IK1, LYF1	603023	7p12	Cancer	截虐药	截虐藥	anti-malaria medicinal
886	Leukemia, acute lymphoblastic, susceptibility to (3)	HOXD4, HOX4B	142981	2q31-q32	Cancer	截虐药	截虐藥	anti-malaria medicinal
886	Leukemia, acute lymphocytic (3)	BCR, CML, PHL, ALL	151410	22q11.21	Cancer	马鞭草	馬鞭草	Verbena officinalis L.
886	Leukemia, acute myeloblastic (3)	ARNT	126110	1q21	Cancer	截虐药	截虐藥	anti-malaria medicinal
886	Leukemia, acute myelogenous (3)	KRAS2, RASK2	190070	12p12.1	Cancer	截虐药	截虐藥	anti-malaria medicinal
886	Leukemia, acute myelogenous, 601626 (3)	GMPS	600358	3q24	Cancer	马鞭草	馬鞭草	Verbena officinalis L.
886	Leukemia, acute myeloid, 601626 (3)	AF10	602409	10p12	Cancer	截虐药	截虐藥	anti-malaria medicinal
886	Leukemia, acute myeloid, 601626 (3)	ARHGEF12, LARG, KIAA0382	604763	11q23.3	Cancer	马鞭草	馬鞭草	Verbena officinalis L.
886	Leukemia, acute myeloid, 601626 (3)	CALM, CLTH	603025	11q14	Cancer	截虐药	截虐藥	anti-malaria medicinal
886	Leukemia, acute myeloid, 601626 (3)	CEBPA, CEBP	116897	19q13.1	Cancer	马鞭草	馬鞭草	Verbena officinalis L.
886	Leukemia, acute myeloid, 601626 (3)	CHIC2, BTL	604332	4q11-q12	Cancer	截虐药	截虐藥	anti-malaria medicinal
886	Leukemia, acute myeloid, 601626 (3)	FLT3	136351	13q12	Cancer	马鞭草	馬鞭草	Verbena officinalis L.
886	Leukemia, acute myeloid, 601626 (3)	KIT, PBT	164920	4q12	Cancer	截虐药	截虐藥	anti-malaria medicinal
886	Leukemia, acute myeloid, 601626 (3)	LPP	600700	3q28	Cancer	截虐药	截虐藥	anti-malaria medicinal
886	Leukemia, acute myeloid, 601626 (3)	NPM1	164040	5q35	Cancer	马鞭草	馬鞭草	Verbena officinalis L.
886	Leukemia, acute myeloid, 601626 (3)	NUP214, D9S46E, CAN, CAIN	114350	9q34.1	Cancer	截虐药	截虐藥	anti-malaria medicinal
886	Leukemia, acute myeloid, 601626 (3)	RUNX1, CBFA2, AML1	151385	21q22.3	Cancer	马鞭草	馬鞭草	Verbena officinalis L.
886	Leukemia, acute myeloid, 601626 (3)	WHSC1L1, NSD3	607083	8p12	Cancer	截虐药	截虐藥	anti-malaria medicinal
886	Leukemia, acute myeloid, reduced survival in (3)	FLT3	136351	13q12	Cancer	马鞭草	馬鞭草	Verbena officinalis L.
886	Leukemia, acute myelomonocytic (3)	AF1Q	604684	1q21	Cancer	截虐药	截虐藥	anti-malaria medicinal
886	Leukemia, acute promyelocytic, NPM/RARA type (3)	NPM1	164040	5q35	Cancer	马鞭草	馬鞭草	Verbena officinalis L.
886	Leukemia, acute promyelocytic, NUMA/RARA type (3)	NUMA1	164009	11q13	Cancer	截虐药	截虐藥	anti-malaria medicinal
886	Leukemia, acute promyelocytic, PL2F/RARA type (3)	ZNF145, PLZF	176797	11q23.1	Cancer	截虐药	截虐藥	anti-malaria medicinal
886	Leukemia, acute promyelocytic, PML/RARA type (3)	PML, MYL	102578	15q22	Cancer	马鞭草	馬鞭草	Verbena officinalis L.
886	Leukemia, acute promyeloyctic, STAT5B/RARA type (3)	STAT5B	604260	17q11.2	Cancer	截虐药	截虐藥	anti-malaria medicinal
886	Leukemia, acute T-cell lymphoblastic (3)	AF10	602409	10p12	Cancer	马鞭草	馬鞭草	Verbena officinalis L.
886	Leukemia, acute T-cell lymphoblastic (3)	CALM, CLTH	603025	11q14	Cancer	截虐药	截虐藥	anti-malaria medicinal
886	Leukemia, chronic lymphatic, susceptibility to, 151400 (3)	ARL11, ARLTS1	609351	13q14.3	Cancer	马鞭草	馬鞭草	Verbena officinalis L.
886	Leukemia, chronic lymphatic, susceptibility to, 151400 (3)	P2RX7, P2X7	602566	12q24	Cancer	截虐药	截虐藥	anti-malaria medicinal
886	Leukemia, chronic myeloid, 608232 (3)	BCR, CML, PHL, ALL	151410	22q11.21	Cancer	马鞭草	馬鞭草	Verbena officinalis L.
886	Leukemia, juvenile myelomonocytic, 607785 (3)	GRAF	605370	5q31	Cancer	截虐药	截虐藥	anti-malaria medicinal
886	Leukemia, juvenile myelomonocytic, 607785 (3)	NF1, VRNF, WSS, NFNS	162200	17q11.2	Cancer	截虐药	截虐藥	anti-malaria medicinal
886	Leukemia, juvenile myelomonocytic, 607785 (3)	PTPN11, PTP2C, SHP2, NS1	176876	12q24.1	Cancer	马鞭草	馬鞭草	Verbena officinalis L.
886	Leukemia, megakaryoblastic, of Down syndrome, 190685 (3)	GATA1, GF1, ERYF1, NFE1	305371	Xp11.23	Cancer	截虐药	截虐藥	anti-malaria medicinal
886	Leukemia, megakaryoblastic, with or without Down syndrome, 190685 (3)	GATA1, GF1, ERYF1, NFE1	305371	Xp11.23	Cancer	马鞭草	馬鞭草	Verbena officinalis L.
886	Leukemia, Philadelphia chromosome-positive, resistant to imatinib (3)	ABL1	189980	9q34.1	Cancer	截虐药	截虐藥	anti-malaria medicinal
886	Leukemia, post-chemotherapy, susceptibility to (3)	NQO1, DIA4, NMOR1	125860	16q22.1	Cancer	马鞭草	馬鞭草	Verbena officinalis L.
886	Leukemia, T-cell acute lymphoblastic (3)	NUP214, D9S46E, CAN, CAIN	114350	9q34.1	Cancer	截虐药	截虐藥	anti-malaria medicinal
886	Leukemia/lymphoma, B-cell, 2 (3)	BCL2	151430	18q21.3	Cancer	马鞭草	馬鞭草	Verbena officinalis L.
886	Leukemia/lymphoma, chronic B-cell, 151400 (3)	CCND1, PRAD1, BCL1	168461	11q13	Cancer	截虐药	截虐藥	anti-malaria medicinal
886	Leukemia/lymphoma, T-cell (3)	TCRA	186880	14q11.2	Cancer	截虐药	截虐藥	anti-malaria medicinal
886	Leukemia-1, T-cell acute lymphocytic (3)	TAL1, TCL5, SCL	187040	1p32	Cancer	马鞭草	馬鞭草	Verbena officinalis L.
886	Leukemia-2, T-cell acute lymphoblastic (3)	TAL2	186855	9q31	Cancer	截虐药	截虐藥	anti-malaria medicinal
894	Leydig cell adenoma, with precocious puberty (3)	LHCGR	152790	2p21	Cancer	马鞭草	馬鞭草	Verbena officinalis L.
895	Lhermitte-Duclos syndrome (3)	PTEN, MMAC1	601728	10q23.31	Cancer	截虐药	截虐藥	anti-malaria medicinal
897	Li Fraumeni syndrome, 151623 (3)	CDKN2A, MTS1, P16, MLM, CMM2	600160	9p21	Cancer	马鞭草	馬鞭草	Verbena officinalis L.
898	Li-Fraumeni syndrome, 151623 (3)	TP53, P53, LFS1	191170	17p13.1	Cancer	截虐药	截虐藥	anti-malaria medicinal
898	Li-Fraumeni syndrome, 609265 (3)	CHEK2, RAD53, CHK2, CDS1, LFS2	604373	22q12.1	Cancer	马鞭草	馬鞭草	Verbena officinalis L.
904	Lipoma (3)	HMGA2, HMGIC, BABL, LIPO	600698	12q14.3	Cancer	截虐药	截虐藥	anti-malaria medicinal
904	Lipoma (3)	LPP	600700	3q28	Cancer	截虐药	截虐藥	anti-malaria medicinal
904	Lipoma, sporadic (3)	MEN1	131100	11q13	Cancer	马鞭草	馬鞭草	Verbena officinalis L.
904	Lipomatosis, mutiple, 151900 (3)	HMGA2, HMGIC, BABL, LIPO	600698	12q14.3	Cancer	截虐药	截虐藥	anti-malaria medicinal
918	Lung cancer, 211980 (3)	KRAS2, RASK2	190070	12p12.1	Cancer	马鞭草	馬鞭草	Verbena officinalis L.
918	Lung cancer, 211980 (3)	PPP2R1B	603113	11q22-q24	Cancer	截虐药	截虐藥	anti-malaria medicinal
918	Lung cancer, 211980 (3)	SLC22A1L, BWSCR1A, IMPT1	602631	11p15.5	Cancer	马鞭草	馬鞭草	Verbena officinalis L.
918	Lung cancer, somatic, 211980 (3)	MAP3K8, COT, EST, TPL2	191195	10p11.2	Cancer	截虐药	截虐藥	anti-malaria medicinal
925	Lymphocytic leukemia, acute T-cell (3)	RAP1GDS1	179502	4q21-q25	Cancer	马鞭草	馬鞭草	Verbena officinalis L.
925	Lymphoma, B-cell non-Hodgkin, somatic (3)	ATM, ATA, AT1	607585	11q22.3	Cancer	截虐药	截虐藥	anti-malaria medicinal
925	Lymphoma, diffuse large cell (3)	BCL8	601889	15q11-q13	Cancer	截虐药	截虐藥	anti-malaria medicinal
925	Lymphoma, follicular (3)	BCL10	603517	1p22	Cancer	马鞭草	馬鞭草	Verbena officinalis L.
925	Lymphoma, MALT (3)	BCL10	603517	1p22	Cancer	截虐药	截虐藥	anti-malaria medicinal
925	Lymphoma, mantle cell (3)	ATM, ATA, AT1	607585	11q22.3	Cancer	马鞭草	馬鞭草	Verbena officinalis L.
925	Lymphoma, non-Hodgkin (3)	RAD54B	604289	8q21.3-q22	Cancer	截虐药	截虐藥	anti-malaria medicinal
925	Lymphoma, non-Hodgkin (3)	RAD54L, HR54, HRAD54	603615	1p32	Cancer	马鞭草	馬鞭草	Verbena officinalis L.
925	Lymphoma, progression of (3)	FCGR2B, CD32	604590	1q22	Cancer	截虐药	截虐藥	anti-malaria medicinal
925	Lymphoma, somatic (3)	MAD1L1, TXBP181	602686	7p22	Cancer	马鞭草	馬鞭草	Verbena officinalis L.
925	Lymphoma, T-cell (3)	MSH2, COCA1, FCC1, HNPCC1	609309	2p22-p21	Cancer	截虐药	截虐藥	anti-malaria medicinal
925	Lymphoproliferative syndrome, X-linked, 308240 (3)	SH2D1A, LYP, IMD5, XLP, XLPD	300490	Xq25	Cancer	截虐药	截虐藥	anti-malaria medicinal
930	Lynch cancer family syndrome II, 114400 (3)	MSH2, COCA1, FCC1, HNPCC1	609309	2p22-p21	Cancer	马鞭草	馬鞭草	Verbena officinalis L.
944	MALT lymphoma (3)	MALT1, MLT	604860	18q21	Cancer	截虐药	截虐藥	anti-malaria medicinal
958	Mast cell leukemia (3)	KIT, PBT	164920	4q12	Cancer	马鞭草	馬鞭草	Verbena officinalis L.
2969	Medullary thyroid carcinoma, 155240 (3)	RET, MEN2A	164761	10q11.2	Cancer	截虐药	截虐藥	anti-malaria medicinal
2969	Medullary thyroid carcinoma, familial, 155240 (3)	NTRK1, TRKA, MTC	191315	1q21-q22	Cancer	马鞭草	馬鞭草	Verbena officinalis L.
970	Medulloblastoma, 155255 (3)	PTCH2	603673	1p32	Cancer	截虐药	截虐藥	anti-malaria medicinal
970	Medulloblastoma, desmoplastic, 155255 (3)	SUFU, SUFUXL, SUFUH	607035	10q24-q25	Cancer	马鞭草	馬鞭草	Verbena officinalis L.
973	Megakaryoblastic leukemia, acute (3)	MKL1, AMKL, MAL	606078	22q13	Cancer	截虐药	截虐藥	anti-malaria medicinal
978	Melanoma (3)	CDK4, CMM3	123829	12q14	Cancer	截虐药	截虐藥	anti-malaria medicinal
978	Melanoma and neural system tumor syndrome, 155755 (3)	CDKN2A, MTS1, P16, MLM, CMM2	600160	9p21	Cancer	马鞭草	馬鞭草	Verbena officinalis L.
978	Melanoma, cutaneous malignant, 2, 155601 (3)	CDKN2A, MTS1, P16, MLM, CMM2	600160	9p21	Cancer	截虐药	截虐藥	anti-malaria medicinal
978	Melanoma, cutaneous malignant, susceptibility to (3)	XRCC3	600675	14q32.3	Cancer	截虐药	截虐藥	anti-malaria medicinal
978	Melanoma, malignant sporadic (3)	STK11, PJS, LKB1	602216	19p13.3	Cancer	马鞭草	馬鞭草	Verbena officinalis L.
978	Melanoma, melignant, somatic (3)	BRAF	164757	7q34	Cancer	截虐药	截虐藥	anti-malaria medicinal
986	Meningioma, 607174 (3)	MN1, MGCR	156100	22q12.3-qter	Cancer	马鞭草	馬鞭草	Verbena officinalis L.
986	Meningioma, 607174 (3)	PTEN, MMAC1	601728	10q23.31	Cancer	截虐药	截虐藥	anti-malaria medicinal
986	Meningioma, NF2-related, somatic, 607174 (3)	NF2	607379	22q12.2	Cancer	马鞭草	馬鞭草	Verbena officinalis L.
986	Meningioma, SIS-related (3)	PDGFB, SIS	190040	22q12.3-q13.1	Cancer	截虐药	截虐藥	anti-malaria medicinal
992	Merkel cell carcinoma, somatic (3)	SDHD, PGL1	602690	11q23	Cancer	马鞭草	馬鞭草	Verbena officinalis L.
995	Mesothelioma (3)	BCL10	603517	1p22	Cancer	截虐药	截虐藥	anti-malaria medicinal
1031	Mucoepidermoid salivary gland carcinoma (3)	MAML2, MAM3	607537	11q21	Cancer	截虐药	截虐藥	anti-malaria medicinal
1031	Mucoepidermoid salivary gland carcinoma (3)	MECT1, KIAA0616	607536	19p13	Cancer	马鞭草	馬鞭草	Verbena officinalis L.
1035	Muir-Torre syndrome, 158320 (3)	MLH1, COCA2, HNPCC2	120436	3p21.3	Cancer	截虐药	截虐藥	anti-malaria medicinal
1035	Muir-Torre syndrome, 158320 (3)	MSH2, COCA1, FCC1, HNPCC1	609309	2p22-p21	Cancer	马鞭草	馬鞭草	Verbena officinalis L.
3037	Multiple cutaneous and uterine leiomyomata, 150800 (3)	FH	136850	1q42.1	Cancer	截虐药	截虐藥	anti-malaria medicinal
1037	Multiple endocrine neoplasia I (3)	MEN1	131100	11q13	Cancer	马鞭草	馬鞭草	Verbena officinalis L.
1037	Multiple endocrine neoplasia IIA, 171400 (3)	RET, MEN2A	164761	10q11.2	Cancer	截虐药	截虐藥	anti-malaria medicinal
1037	Multiple endocrine neoplasia IIB, 162300 (3)	RET, MEN2A	164761	10q11.2	Cancer	马鞭草	馬鞭草	Verbena officinalis L.
5037	Multiple malignancy syndrome (3)	TP53, P53, LFS1	191170	17p13.1	Cancer	截虐药	截虐藥	anti-malaria medicinal
9037	Multiple myeloma (3)	IRF4, LSIRF	601900	6p25-p23	Cancer	截虐药	截虐藥	anti-malaria medicinal
9037	Multiple myeloma, resistance to, 254500 (3)	LIG4	601837	13q22-q34	Cancer	马鞭草	馬鞭草	Verbena officinalis L.
1047	Myelogenous leukemia, acute (3)	FACL6, ACS2	604443	5q31	Cancer	截虐药	截虐藥	anti-malaria medicinal
1047	Myelogenous leukemia, acute (3)	IRF1, MAR	147575	5q31.1	Cancer	马鞭草	馬鞭草	Verbena officinalis L.
1047	Myeloid leukemia, acute, M4Eo subtype (3)	CBFB	121360	16q22	Cancer	截虐药	截虐藥	anti-malaria medicinal
1047	Myeloid malignancy, predisposition to (3)	CSF1R, FMS	164770	5q33.2-q33.3	Cancer	马鞭草	馬鞭草	Verbena officinalis L.
1050	Myelomonocytic leukemia, chronic (3)	PDGFRB, PDGFR	173410	5q31-q32	Cancer	截虐药	截虐藥	anti-malaria medicinal
1052	Myeloproliferative disorder with eosinophilia, 131440 (3)	PDGFRB, PDGFR	173410	5q31-q32	Cancer	马鞭草	馬鞭草	Verbena officinalis L.
1065	Myxoid liposarcoma (3)	DDIT3, GADD153, CHOP10	126337	12q13.1-q13.2	Cancer	截虐药	截虐藥	anti-malaria medicinal
1074	Nasopharyngeal carcinoma, 161550 (3)	TP53, P53, LFS1	191170	17p13.1	Cancer	截虐药	截虐藥	anti-malaria medicinal
1091	Neuroblastoma, 256700 (3)	NME1, NM23	156490	17q21.3	Cancer	马鞭草	馬鞭草	Verbena officinalis L.
1091	Neuroblastoma, 256700 (3)	PMX2B, NBPHOX, PHOX2B	603851	4p12	Cancer	截虐药	截虐藥	anti-malaria medicinal
1095	Neurofibromatosis, familial spinal, 162210 (3)	NF1, VRNF, WSS, NFNS	162200	17q11.2	Cancer	马鞭草	馬鞭草	Verbena officinalis L.
1097	Neurofibromatosis, type 1 (3)	NF1, VRNF, WSS, NFNS	162200	17q11.2	Cancer	截虐药	截虐藥	anti-malaria medicinal
1097	Neurofibromatosis, type 2, 101000 (3)	NF2	607379	22q12.2	Cancer	马鞭草	馬鞭草	Verbena officinalis L.
1097	Neurofibromatosis, type I, with leukemia, 162200 (3)	MSH2, COCA1, FCC1, HNPCC1	609309	2p22-p21	Cancer	截虐药	截虐藥	anti-malaria medicinal
1096	Neurofibromatosis-Noonan syndrome, 601321 (3)	NF1, VRNF, WSS, NFNS	162200	17q11.2	Cancer	马鞭草	馬鞭草	Verbena officinalis L.
1098	Neurofibrosarcoma (3)	MXI1	600020	10q25	Cancer	截虐药	截虐藥	anti-malaria medicinal
1114	Non-Hodgkin lymphoma, somatic, 605027 (3)	CASP10, MCH4, ALPS2	601762	2q33-q34	Cancer	截虐药	截虐藥	anti-malaria medicinal
1115	Nonsmall cell lung cancer (3)	IRF1, MAR	147575	5q31.1	Cancer	马鞭草	馬鞭草	Verbena officinalis L.
1115	Nonsmall cell lung cancer, response to tyrosine kinase inhibitor in, 211980 (3)	EGFR	131550	7p12.3-p12.1	Cancer	截虐药	截虐藥	anti-malaria medicinal
1115	Nonsmall cell lung cancer, somatic (3)	BRAF	164757	7q34	Cancer	马鞭草	馬鞭草	Verbena officinalis L.
1138	Oligodendroglioma, 137800 (3)	PTEN, MMAC1	601728	10q23.31	Cancer	截虐药	截虐藥	anti-malaria medicinal
1140	Oligodontia-colorectal cancer syndrome, 608615 (3)	AXIN2	604025	17q24	Cancer	马鞭草	馬鞭草	Verbena officinalis L.
1148	Orolaryngeal cancer, multiple, (3)	CDKN2A, MTS1, P16, MLM, CMM2	600160	9p21	Cancer	截虐药	截虐藥	anti-malaria medicinal
1166	Osteosarcoma (3)	TP53, P53, LFS1	191170	17p13.1	Cancer	马鞭草	馬鞭草	Verbena officinalis L.
1166	Osteosarcoma, somatic, 259500 (3)	CHEK2, RAD53, CHK2, CDS1, LFS2	604373	22q12.1	Cancer	截虐药	截虐藥	anti-malaria medicinal
1170	Ovarian cancer (3)	BRCA1, PSCP	113705	17q21	Cancer	截虐药	截虐藥	anti-malaria medicinal
1170	Ovarian cancer (3)	MSH2, COCA1, FCC1, HNPCC1	609309	2p22-p21	Cancer	马鞭草	馬鞭草	Verbena officinalis L.
1170	Ovarian cancer, 604370 (3)	PIK3CA	171834	3q26.3	Cancer	截虐药	截虐藥	anti-malaria medicinal
1170	Ovarian cancer, endometrial type (3)	MSH6, GTBP, HNPCC5	600678	2p16	Cancer	马鞭草	馬鞭草	Verbena officinalis L.
1170	Ovarian cancer, somatic, (3)	ERBB2, NGL, NEU, HER2	164870	17q21.1	Cancer	截虐药	截虐藥	anti-malaria medicinal
1170	Ovarian carcinoma (3)	CDH1, UVO	192090	16q22.1	Cancer	马鞭草	馬鞭草	Verbena officinalis L.
1170	Ovarian carcinoma (3)	RRAS2, TC21	600098	11pter-p15.5	Cancer	截虐药	截虐藥	anti-malaria medicinal
1170	Ovarian carcinoma, endometrioid type (3)	CTNNB1	116806	3p22-p21.3	Cancer	马鞭草	馬鞭草	Verbena officinalis L.
7170	Ovarian sex cord tumors (3)	FSHR, ODG1	136435	2p21-p16	Cancer	截虐药	截虐藥	anti-malaria medicinal
1178	Pancreatic cancer (3)	MADH4, DPC4, SMAD4, JIP	600993	18q21.1	Cancer	截虐药	截虐藥	anti-malaria medicinal
1178	Pancreatic cancer, 260350 (3)	ARMET, ARP	601916	3p21.1	Cancer	马鞭草	馬鞭草	Verbena officinalis L.
1178	Pancreatic cancer, 260350 (3)	BRCA2, FANCD1	600185	13q12.3	Cancer	截虐药	截虐藥	anti-malaria medicinal
1178	Pancreatic cancer, 260350 (3)	TP53, P53, LFS1	191170	17p13.1	Cancer	马鞭草	馬鞭草	Verbena officinalis L.
1178	Pancreatic cancer, somatic (3)	ACVR1B, ACVRLK4, ALK4	601300	12q13	Cancer	截虐药	截虐藥	anti-malaria medicinal
1178	Pancreatic cancer, sporadic (3)	STK11, PJS, LKB1	602216	19p13.3	Cancer	马鞭草	馬鞭草	Verbena officinalis L.
1178	Pancreatic cancer/melanoma syndrome, 606719 (3)	CDKN2A, MTS1, P16, MLM, CMM2	600160	9p21	Cancer	截虐药	截虐藥	anti-malaria medicinal
1178	Pancreatic carcinoma, somatic (3)	RBBP8, RIM	604124	18q11.2	Cancer	马鞭草	馬鞭草	Verbena officinalis L.
1178	Pancreatic carcinoma, somatic, 260350 (3)	KRAS2, RASK2	190070	12p12.1	Cancer	截虐药	截虐藥	anti-malaria medicinal
1183	Papillary serous carcinoma of the peritoneum (3)	BRCA1, PSCP	113705	17q21	Cancer	截虐药	截虐藥	anti-malaria medicinal
1186	Paraganglioma, familial malignant, 168000 (3)	SDHB, SDH1, SDHIP	185470	1p36.1-p35	Cancer	马鞭草	馬鞭草	Verbena officinalis L.
1186	Paraganglioma, sporadic corotid body, 168000 (3)	SDHD, PGL1	602690	11q23	Cancer	截虐药	截虐藥	anti-malaria medicinal
1186	Paragangliomas, familial central nervous system, 168000 (3)	SDHD, PGL1	602690	11q23	Cancer	马鞭草	馬鞭草	Verbena officinalis L.
1186	Paragangliomas, familial nonchromaffin, 1, with and without deafness, 168000 (3)	SDHD, PGL1	602690	11q23	Cancer	截虐药	截虐藥	anti-malaria medicinal
1186	Paragangliomas, familial nonchromaffin, 3, 605373 (3)	SDHC, PGL3	602413	1q21	Cancer	马鞭草	馬鞭草	Verbena officinalis L.
1189	Parathyroid adenoma with cystic changes, 145001 (3)	HRPT2, C1orf28	607393	1q25-q31	Cancer	截虐药	截虐藥	anti-malaria medicinal
1189	Parathyroid adenoma, sporadic (3)	MEN1	131100	11q13	Cancer	马鞭草	馬鞭草	Verbena officinalis L.
1189	Parathyroid carcinoma, 608266 (3)	HRPT2, C1orf28	607393	1q25-q31	Cancer	截虐药	截虐藥	anti-malaria medicinal
1214	Peutz-Jeghers syndrome, 175200 (3)	STK11, PJS, LKB1	602216	19p13.3	Cancer	截虐药	截虐藥	anti-malaria medicinal
1218	Pheochromocytoma, 171300 (3)	SDHD, PGL1	602690	11q23	Cancer	马鞭草	馬鞭草	Verbena officinalis L.
1218	Pheochromocytoma, 171300 (3)	VHL	608537	3p26-p25	Cancer	截虐药	截虐藥	anti-malaria medicinal
1218	Pheochromocytoma, extraadrenal, and cervical paraganglioma, 115310 (3)	SDHB, SDH1, SDHIP	185470	1p36.1-p35	Cancer	截虐药	截虐藥	anti-malaria medicinal
3229	Pigmented adrenocortical disease, primary isolated, 160980 (3)	PRKAR1A, TSE1, CNC1, CAR	188830	17q23-q24	Cancer	马鞭草	馬鞭草	Verbena officinalis L.
1230	Pilomatricoma, 132600 (3)	CTNNB1	116806	3p22-p21.3	Cancer	截虐药	截虐藥	anti-malaria medicinal
1232	Pituitary ACTH secreting adenoma (3)	GNAS, GNAS1, GPSA, POH, PHP1B, PHP1A, AHO	139320	20q13.2	Cancer	马鞭草	馬鞭草	Verbena officinalis L.
1232	Pituitary ACTH-secreting adenoma (3)	GNAI2, GNAI2B, GIP	139360	3p21	Cancer	截虐药	截虐藥	anti-malaria medicinal
1232	Pituitary adenoma, nonfunctioning (3)	THRA, ERBA1, THRA1	190120	17q11.2	Cancer	马鞭草	馬鞭草	Verbena officinalis L.
7232	Pituitary tumor, invasive (3)	PRKCA, PKCA	176960	17q22-q23.2	Cancer	截虐药	截虐藥	anti-malaria medicinal
1245	Polyposis, juvenile intestinal, 174900 (3)	BMPR1A, ACVRLK3, ALK3	601299	10q22.3	Cancer	马鞭草	馬鞭草	Verbena officinalis L.
1245	Polyposis, juvenile intestinal, 174900 (3)	MADH4, DPC4, SMAD4, JIP	600993	18q21.1	Cancer	截虐药	截虐藥	anti-malaria medicinal
1272	Prostate cancer (3)	AR, DHTR, TFM, SBMA, KD, SMAX1	313700	Xq11-q12	Cancer	截虐药	截虐藥	anti-malaria medicinal
1272	Prostate cancer 1, 176807, 601518 (3)	RNASEL, RNS4, PRCA1, HPC1	180435	1q25	Cancer	马鞭草	馬鞭草	Verbena officinalis L.
1272	Prostate cancer, 176807 (3)	BRCA2, FANCD1	600185	13q12.3	Cancer	截虐药	截虐藥	anti-malaria medicinal
1272	Prostate cancer, 176807 (3)	PTEN, MMAC1	601728	10q23.31	Cancer	马鞭草	馬鞭草	Verbena officinalis L.
1272	Prostate cancer, familial, 176807 (3)	CHEK2, RAD53, CHK2, CDS1, LFS2	604373	22q12.1	Cancer	截虐药	截虐藥	anti-malaria medicinal
1272	Prostate cancer, hereditary, 176807 (3)	MSR1	153622	8p22	Cancer	马鞭草	馬鞭草	Verbena officinalis L.
1272	Prostate cancer, progression and metastasis of, 176807 (3)	EPHB2, EPHT3, DRT, ERK	600997	1p36.1-p35	Cancer	截虐药	截虐藥	anti-malaria medicinal
1272	Prostate cancer, somatic, 176807 (3)	KLF6, COPEB, BCD1, ZF9	602053	10p15	Cancer	马鞭草	馬鞭草	Verbena officinalis L.
1272	Prostate cancer, somatic, 176807 (3)	MAD1L1, TXBP181	602686	7p22	Cancer	截虐药	截虐藥	anti-malaria medicinal
1272	Prostate cancer, susceptibility to, 176807 (3)	AR, DHTR, TFM, SBMA, KD, SMAX1	313700	Xq11-q12	Cancer	截虐药	截虐藥	anti-malaria medicinal
1272	Prostate cancer, susceptibility to, 176807 (3)	ATBF1	104155	16q22.3-q23.1	Cancer	马鞭草	馬鞭草	Verbena officinalis L.
1272	Prostate cancer, susceptibility to, 176807 (3)	ELAC2, HPC2	605367	17p11	Cancer	截虐药	截虐藥	anti-malaria medicinal
1272	Prostate cancer, susceptibility to, 176807 (3)	MXI1	600020	10q25	Cancer	马鞭草	馬鞭草	Verbena officinalis L.
1308	Renal carcinoma, chromophobe, somatic, 144700 (3)	FLCN, BHD	607273	17p11.2	Cancer	截虐药	截虐藥	anti-malaria medicinal
1308	Renal cell carcinoma, 144700 (3)	TRC8, RCA1, HRCA1	603046	8q24.1	Cancer	马鞭草	馬鞭草	Verbena officinalis L.
1308	Renal cell carcinoma, clear cell, somatic, 144700 (3)	OGG1	601982	3p26.2	Cancer	截虐药	截虐藥	anti-malaria medicinal
1308	Renal cell carcinoma, papillary, 1, 605074 (3)	PRCC, RCCP1	179755	1q21	Cancer	马鞭草	馬鞭草	Verbena officinalis L.
1308	Renal cell carcinoma, papillary, 1, 605074 (3)	TFE3	314310	Xp11.22	Cancer	截虐药	截虐藥	anti-malaria medicinal
1308	Renal cell carcinoma, papillary, familial and sporadic, 605074 (3)	MET	164860	7q31	Cancer	截虐药	截虐藥	anti-malaria medicinal
1308	Renal cell carcinoma, somatic (3)	VHL	608537	3p26-p25	Cancer	马鞭草	馬鞭草	Verbena officinalis L.
1317	Retinoblastoma (3)	RB1	180200	13q14.1-q14.2	Cancer	截虐药	截虐藥	anti-malaria medicinal
1322	Rhabdoid predisposition syndrome, familial (3)	SMARCB1, SNF5, INI1, RDT	601607	22q11	Cancer	马鞭草	馬鞭草	Verbena officinalis L.
1322	Rhabdoid tumors (3)	SMARCB1, SNF5, INI1, RDT	601607	22q11	Cancer	截虐药	截虐藥	anti-malaria medicinal
1323	Rhabdomyosarcoma, 268210 (3)	SLC22A1L, BWSCR1A, IMPT1	602631	11p15.5	Cancer	马鞭草	馬鞭草	Verbena officinalis L.
1323	Rhabdomyosarcoma, alveolar, 268220 (3)	FOXO1A, FKHR	136533	13q14.1	Cancer	截虐药	截虐藥	anti-malaria medicinal
1323	Rhabdomyosarcoma, alveolar, 268220 (3)	PAX3, WS1, HUP2, CDHS	606597	2q35	Cancer	马鞭草	馬鞭草	Verbena officinalis L.
1323	Rhabdomyosarcoma, alveolar, 268220 (3)	PAX7	167410	1p36.2-p36.12	Cancer	截虐药	截虐藥	anti-malaria medicinal
1345	Salivary adenoma (3)	HMGA2, HMGIC, BABL, LIPO	600698	12q14.3	Cancer	截虐药	截虐藥	anti-malaria medicinal
1350	Sarcoma, synovial (3)	SSX1, SSRC	312820	Xp11.2	Cancer	马鞭草	馬鞭草	Verbena officinalis L.
1350	Sarcoma, synovial (3)	SSX2	300192	Xp11.2	Cancer	截虐药	截虐藥	anti-malaria medicinal
1360	Schwannomatosis, 162091 (3)	NF2	607379	22q12.2	Cancer	马鞭草	馬鞭草	Verbena officinalis L.
1385	Sezary syndrome (3)	BCL10	603517	1p22	Cancer	截虐药	截虐藥	anti-malaria medicinal
1437	Squamous cell carcinoma, burn scar-related, somatic (3)	TNFRSF6, APT1, FAS, CD95, ALPS1A	134637	10q24.1	Cancer	马鞭草	馬鞭草	Verbena officinalis L.
1437	Squamous cell carcinoma, head and neck, 601400 (3)	ING1	601566	13q34	Cancer	截虐药	截虐藥	anti-malaria medicinal
1437	Squamous cell carcinoma, head and neck, 601400 (3)	TNFRSF10B, DR5, TRAILR2	603612	8p22-p21	Cancer	马鞭草	馬鞭草	Verbena officinalis L.
1445	Stem-cell leukemia/lymphoma syndrome (3)	ZNF198, SCLL, RAMP, FIM	602221	13q11-q12	Cancer	截虐药	截虐藥	anti-malaria medicinal
1449	Stomach cancer, 137215 (3)	KRAS2, RASK2	190070	12p12.1	Cancer	截虐药	截虐藥	anti-malaria medicinal
1478	T-cell acute lymphoblastic leukemia (3)	BAX	600040	19q13.3-q13.4	Cancer	马鞭草	馬鞭草	Verbena officinalis L.
1478	T-cell prolymphocytic leukemia, sporadic (3)	ATM, ATA, AT1	607585	11q22.3	Cancer	截虐药	截虐藥	anti-malaria medicinal
1503	Thyroid adenoma, hyperfunctioning (3)	TSHR	603372	14q31	Cancer	马鞭草	馬鞭草	Verbena officinalis L.
1503	Thyroid carcinoma (3)	TP53, P53, LFS1	191170	17p13.1	Cancer	截虐药	截虐藥	anti-malaria medicinal
1503	Thyroid carcinoma, follicular, 188470 (3)	MINPP1, HIPER1	605391	10q23	Cancer	马鞭草	馬鞭草	Verbena officinalis L.
1503	Thyroid carcinoma, follicular, 188470 (3)	PTEN, MMAC1	601728	10q23.31	Cancer	截虐药	截虐藥	anti-malaria medicinal
1503	Thyroid carcinoma, follicular, somatic, 188470 (3)	HRAS	190020	11p15.5	Cancer	马鞭草	馬鞭草	Verbena officinalis L.
1503	Thyroid carcinoma, papillary, 188550 (3)	GOLGA5, RFG5, PTC5	606918	14q	Cancer	截虐药	截虐藥	anti-malaria medicinal
1503	Thyroid carcinoma, papillary, 188550 (3)	NCOA4, ELE1, PTC3	601984	10q11.2	Cancer	截虐药	截虐藥	anti-malaria medicinal
1503	Thyroid carcinoma, papillary, 188550 (3)	PCM1, PTC4	600299	8p22-p21.3	Cancer	马鞭草	馬鞭草	Verbena officinalis L.
1503	Thyroid carcinoma, papillary, 188550 (3)	PRKAR1A, TSE1, CNC1, CAR	188830	17q23-q24	Cancer	截虐药	截虐藥	anti-malaria medicinal
1503	Thyroid carcinoma, papillary, 188550 (3)	TIF1G, RFG7, PTC7	605769	1p13	Cancer	马鞭草	馬鞭草	Verbena officinalis L.
1503	Thyroid carcinoma, papillary, 188550 (3)	TRIM24, TIF1, TIF1A, PTC6	603406	7q32-q34	Cancer	截虐药	截虐藥	anti-malaria medicinal
1536	Turcot syndrome with glioblastoma, 276300 (3)	MLH1, COCA2, HNPCC2	120436	3p21.3	Cancer	马鞭草	馬鞭草	Verbena officinalis L.
1536	Turcot syndrome with glioblastoma, 276300 (3)	PMS2, PMSL2, HNPCC4	600259	7p22	Cancer	截虐药	截虐藥	anti-malaria medicinal
1536	Turcot syndrome, 276300 (3)	APC, GS, FPC	175100	5q21-q22	Cancer	马鞭草	馬鞭草	Verbena officinalis L.
1552	Uterine leiomyoma (3)	HMGA2, HMGIC, BABL, LIPO	600698	12q14.3	Cancer	截虐药	截虐藥	anti-malaria medicinal
1572	von Hippel-Lindau disease, modification of, 193300 (3)	CCND1, PRAD1, BCL1	168461	11q13	Cancer	马鞭草	馬鞭草	Verbena officinalis L.
1572	von Hippel-Lindau syndrome, 193300 (3)	VHL	608537	3p26-p25	Cancer	截虐药	截虐藥	anti-malaria medicinal
1581	Watson syndrome, 193520 (3)	NF1, VRNF, WSS, NFNS	162200	17q11.2	Cancer	马鞭草	馬鞭草	Verbena officinalis L.
1595	Wilms tumor susceptibility-5, 601583 (3)	POU6F2, WTSL, WT5	609062	7p14-p13	Cancer	截虐药	截虐藥	anti-malaria medicinal
1595	Wilms tumor, 194070 (3)	BRCA2, FANCD1	600185	13q12.3	Cancer	马鞭草	馬鞭草	Verbena officinalis L.
1595	Wilms tumor, somatic, 194070 (3)	GPC3, SDYS, SGBS1	300037	Xq26	Cancer	截虐药	截虐藥	anti-malaria medicinal
1595	Wilms tumor, type 1, 194070 (3)	WT1	607102	11p13	Cancer	马鞭草	馬鞭草	Verbena officinalis L.
31	Acquired long QT syndrome, susceptibility to (3)	KCNH2, LQT2, HERG	152427	7q35-q36	Cardiovascular	天麻	天麻	Gastrodia elata	extinguish wind to arrest convulsions
130	Aortic aneurysm, ascending, and dissection (3)	FBN1, MFS1, WMS	134797	15q21.1	Cardiovascular	钩藤	鉤藤	Gambir plant (uncaria)	extinguish wind to arrest convulsions
144	Arrhythmogenic right ventricular dysplasia 2, 600996 (3)	RYR2, VTSIP	180902	1q42.1-q43	Cardiovascular	钩藤	鈎藤	Uncaria rhynchophylla	extinguish wind to arrest convulsions
144	Arrhythmogenic right ventricular dysplasia 8, 607450 (3)	DSP, KPPS2, PPKS2	125647	6p24	Cardiovascular	大叶钩藤	大葉鈎藤	Uncaria macrophylla	extinguish wind to arrest convulsions
144	Arrhythmogenic right ventricular dysplasia, familial, 9, 609040 (3)	PKP2, ARVD9	602861	12p11	Cardiovascular	华钩藤	華鈎藤	Uncaria sinensis	extinguish wind to arrest convulsions
163	Atherosclerosis, susceptibility to (3)	ALOX5	152390	10q11.2	Cardiovascular	蜈蚣	蜈蚣	Centipede (Scolopendra subspinipes)	extinguish wind to arrest convulsions
166	Atrial fibrillation, familial, 607554 (3)	KCNE2, MIRP1, LQT6	603796	21q22.1	Cardiovascular	僵蚕	僵蠶	Stiff silkworm (Bombyx mori infected with Beauveria bassiana)	extinguish wind to arrest convulsions
166	Atrial fibrillation, familial, 607554 (3)	KCNQ1, KCNA9, LQT1, KVLQT1, ATFB1	607542	11p15.5	Cardiovascular	天麻	天麻	Gastrodia elata	extinguish wind to arrest convulsions
166	Atrial septal defect 3 (3)	MYH6, ASD3, MYHCA	160710	14q12	Cardiovascular	牛黄	牛黃	Bos taurus domesticus Gmelin	extinguish wind to arrest convulsions
166	Atrial septal defect with atrioventricular conduction defects, 108900 (3)	NKX2E, CSX	600584	5q34	Cardiovascular	牛黄	牛黃	Bubalus bubalis Linnaeus	extinguish wind to arrest convulsions
166	Atrial septal defect-2, 607941 (3)	GATA4	600576	8p23.1-p22	Cardiovascular	全蠍	全蠍	Buthus martensi Karsch	extinguish wind to arrest convulsions
168	Atrioventricular block, idiopathic second-degree (3)	NKX2E, CSX	600584	5q34	Cardiovascular	钩藤	鉤藤	Uncaria rhynchophylla (Miq.) jacks.	extinguish wind to arrest convulsions
168	Atrioventricular septal defect, 600309 (3)	GJA1, CX43, ODDD, SDTY3, ODOD	121014	6q21-q23.2	Cardiovascular	槐花	槐花	Sophora japonica	blood-cooling hemostatic medicinal
168	Atrioventricular septal defect, partial, with heterotaxy syndrome, 606217 (3)	CRELD1, AVSD2	607170	3p25.3	Cardiovascular	小蓟	小薊	Cirsium setosum	blood-cooling hemostatic medicinal
168	Atrioventricular septal defect, susceptibility to, 2, 606217 (3)	CRELD1, AVSD2	607170	3p25.3	Cardiovascular	地榆	地榆	Sanguisorba officinalis	blood-cooling hemostatic medicinal
234	Brugada syndrome, 601144 (3)	SCN5A, LQT3, IVF, HB1, SSS1	600163	3p21	Cardiovascular	苎麻根	苧麻根	Boehmeria nivea	blood-cooling hemostatic medicinal
261	Capillary malformation-arteriovenous malformation, 608354 (3)	RASA1, GAP, CMAVM, PKWS	139150	5q13.3	Cardiovascular	白茅根	白茅根	Imperata cylindrica	blood-cooling hemostatic medicinal
267	Cardioencephalomyopathy, fatal infantile, due to cytochrome c oxidase deficiency,604377 (3)	SCO2	604272	22q13	Cardiovascular	羊蹄	羊蹄	Rumex japonicus Houtt.	blood-cooling hemostatic medicinal
268	Cardiomyopathy, dilated, 115200 (3)	ACTC	102540	15q14	Cardiovascular	草本植物羊蹄	草本植物羊蹄	Rumex japonicus	blood-cooling hemostatic medicinal
268	Cardiomyopathy, dilated, 115200 (3)	MYH7, CMH1, MPD1	160760	14q12	Cardiovascular	尼泊尔羊蹄	尼泊爾羊蹄	Rumex nepalensis	blood-cooling hemostatic medicinal
268	Cardiomyopathy, dilated, 1A, 115200 (3)	LMNA, LMN1, EMD2, FPLD, CMD1A, HGPS, LGMD1B	150330	1q21.2	Cardiovascular	大蓟	大薊	Cirsium japonicum	blood-cooling hemostatic medicinal
268	Cardiomyopathy, dilated, 1D, 601494 (3)	TNNT2, CMH2, CMD1D	191045	1q32	Cardiovascular	侧柏叶	側柏葉	Biota orientalis	blood-cooling hemostatic medicinal
268	Cardiomyopathy, dilated, 1G, 604145 (3), Tibial muscular dystrophy, tardive, 600334 (3)	TTN, CMD1G, TMD, LGMD2J	188840	2q24.3	Cardiovascular	白茅根	白茅根	lmperata cylindrica	blood-cooling hemostatic medicinal
268	Cardiomyopathy, dilated, 1I, 604765 (3)	DES, CMD1I	125660	2q35	Cardiovascular	羊蹄	羊蹄	Yang ti	blood-cooling hemostatic medicinal
268	Cardiomyopathy, dilated, 1J, 605362 (3)	EYA4, DFNA10, CMD1J	603550	6q23	Cardiovascular	侧柏叶	側柏葉	Platycladus orientalis	blood-cooling hemostatic medicinal
268	Cardiomyopathy, dilated, 1L, 606685 (3)	SGCD, SGD, LGMD2F, CMD1L	601411	5q33	Cardiovascular	茵陈	茵陳	Virgate wormwood herb	water-draining and anti-icteric medicinal
268	Cardiomyopathy, dilated, 1M, 607482 (3)	CSRP3, CRP3, CLP, CMD1M	600824	11p15.1	Cardiovascular	植物滨蒿	植物濱蒿	Artemisia scoparia	water-draining and anti-icteric medicinal
268	Cardiomyopathy, dilated, 1N, 607487 (3)	TCAP, LGMD2G, CMD1N	604488	17q12	Cardiovascular	虎扙	虎扙	Polygonum cuspidatum	water-draining and anti-icteric medicinal
268	Cardiomyopathy, dilated, with ventricular tachycardia, 608569 (3)	ABCC9, SUR2	601439	12p12.1	Cardiovascular	地耳草	地耳草	hypericum japonicum	water-draining and anti-icteric medicinal
268	Cardiomyopathy, dilated, X-linked, 302045 (3)	DMD, BMD	300377	Xp21.2	Cardiovascular	垂盆草	垂盆草	Sedum sarmentosum	water-draining and anti-icteric medicinal
268	Cardiomyopathy, familial hypertrophic (3)	TNNI3	191044	19q13.4	Cardiovascular	金钱草	金錢草	Glechoma longituba (Nakai) Kupr.	water-draining and anti-icteric medicinal
268	Cardiomyopathy, familial hypertrophic, 1, 192600 (3)	MYH7, CMH1, MPD1	160760	14q12	Cardiovascular	车前子	車前子	Plantain herb	water-draining and strangury-relieving medicinal
268	Cardiomyopathy, familial hypertrophic, 10, 608758 (3)	MYL2, CMH10	160781	12q23-q24.3	Cardiovascular	植物车前	植物車前	Plantago asiatica	water-draining and strangury-relieving medicinal
268	Cardiomyopathy, familial hypertrophic, 192600 (3)	ACTC	102540	15q14	Cardiovascular	平车前	平車前	Plantago depressa	water-draining and strangury-relieving medicinal
268	Cardiomyopathy, familial hypertrophic, 192600 (3)	CAV3, LGMD1C	601253	3p25	Cardiovascular	地肤子	地膚子	Kochia scoparia	water-draining and strangury-relieving medicinal
268	Cardiomyopathy, familial hypertrophic, 192600 (3)	MYH6, ASD3, MYHCA	160710	14q12	Cardiovascular	萆薢	萆薢	Dioscorea septemloba	water-draining and strangury-relieving medicinal
268	Cardiomyopathy, familial hypertrophic, 192600 (3) ()	TNNC1	191040	3p21.3-p14.3	Cardiovascular	海金沙	海金沙	Lygodium japonicum	water-draining and strangury-relieving medicinal
268	Cardiomyopathy, familial hypertrophic, 2, 115195 (3)	TNNT2, CMH2, CMD1D	191045	1q32	Cardiovascular	通草	通草	Tetrapanax papyriferus	water-draining and strangury-relieving medicinal
268	Cardiomyopathy, familial hypertrophic, 3, 115196 (3)	TPM1, CMH3	191010	15q22.1	Cardiovascular	石韦	石韋	Pyrrosia sheareri	water-draining and strangury-relieving medicinal
268	Cardiomyopathy, familial hypertrophic, 4, 115197 (3)	MYBPC3, CMH4	600958	11p11.2	Cardiovascular	瞿麦	瞿麥	Dianthus superbus L.	water-draining and strangury-relieving medicinal
268	Cardiomyopathy, Familial hypertrophic, 8, 608751 (3)	MYL3, CMH8	160790	3p	Cardiovascular	石竹	石竹	Dianthus chinensis L.	water-draining and strangury-relieving medicinal
268	Cardiomyopathy, familial hypertrophic, 9 (3)	TTN, CMD1G, TMD, LGMD2J	188840	2q24.3	Cardiovascular	石竹	石竹	Dianthus superbus	water-draining and strangury-relieving medicinal
268	Cardiomyopathy, familial restrictive, 115210 (3)	TNNI3	191044	19q13.4	Cardiovascular	萹蓄	萹蓄	Polygonum aviculare	water-draining and strangury-relieving medicinal
268	Cardiomyopathy, hypertrophic, early-onset fatal (3)	COX15	603646	10q24	Cardiovascular	灯心草	燈心草	Common rush	water-draining and strangury-relieving medicinal
268	Cardiomyopathy, hypertrophic, mid-left ventricular chamber type, 608758 (3)	MYL2, CMH10	160781	12q23-q24.3	Cardiovascular	瞿麦	瞿麥	Lilac pink herb	water-draining and strangury-relieving medicinal
268	Cardiomyopathy, hypertrophic, midventricular, digenic, 192600 (3)	MYLK2, MLCK	606566	20q13.3	Cardiovascular	泽泻	澤瀉	Alisma orientalis	water-draining and swelling-dispersing medicinal
268	Cardiomyopathy, hypertrophic, with WPW, 600858 (3)	PRKAG2, WPWS	602743	7q36	Cardiovascular	猪苓	豬苓	Polyporus umbellatus	water-draining and swelling-dispersing medicinal
268	Cardiomyopathy, idiopathic dilated, 115200 (3)	PLN, PLB	172405	6q22.1	Cardiovascular	荠菜	薺菜	Capsella bursapastoris	water-draining and swelling-dispersing medicinal
268	Cardiomyopathy, X-linked dilated, 300069 (3)	TAZ, EFE2, BTHS, CMD3A, LVNCX	300394	Xq28	Cardiovascular	茯苓	茯苓	Poria cocos	water-draining and swelling-dispersing medicinal
279	Cavernous malformations of CNS and retina, 116860 (3)	CCM1, CAM, KRIT1	604214	7q11.2-q21	Cardiovascular	葫芦	葫蘆	Calabash	water-draining and swelling-dispersing medicinal
2291	Cerebral arteriopathy with subcortical infarcts and leukoencephalopathy, 125310 (3)	NOTCH3, CADASIL, CASIL	600276	19p13.2-p13.1	Cardiovascular	植物葫芦	植物葫蘆	Lagenaria siceraria	water-draining and swelling-dispersing medicinal
355	Congestive heart failure, susceptibility to (3)	ADRA2C, ADRA2L2	104250	4p16.1	Cardiovascular	薏苡仁	薏苡仁	Coix lachryma-jobi	water-draining and swelling-dispersing medicinal
355	Congestive heart failure, susceptibility to (3)	ADRB1, ADRB1R, RHR	109630	10q24-q26	Cardiovascular	香加皮	香加皮	Periploca sepium	water-draining and swelling-dispersing medicinal
357	Conotruncal anomaly face syndrome, 217095 (3)	TBX1, DGS, CTHM, CAFS, TGA, DORV, VCFS, DGCR	602054	22q11.2	Cardiovascular	玉米须	玉米鬚	Zea mays	water-draining and swelling-dispersing medicinal
365	Coronary artery disease in familial hypercholesterolemia, protection against, 143890 (3)	ABCA1, ABC1, HDLDT1, TGD	600046	9q22-q31	Cardiovascular	泽漆	澤漆	Euphorbia helioscopia	water-draining and swelling-dispersing medicinal
365	Coronary artery disease, autosomal dominant, 1, 608320 (3)	MEF2A, ADCAD1	600660	15q26	Cardiovascular	荠菜	薺菜	Capsella bursa-pastoris	water-draining and swelling-dispersing medicinal
365	Coronary artery disease, susceptibility to (3)	KL	604824	13q12	Cardiovascular	草本植物羊蹄	草本植物羊蹄	Rumex japonicus
365	Coronary artery disease, susceptibility to (3)	PON1, PON, ESA	168820	7q21.3	Cardiovascular	尼泊尔羊蹄	尼泊爾羊蹄	Rumex nepalensis
365	Coronary artery disease, susceptibility to (3)	PON2	602447	7q21.3	Cardiovascular	大蓟	大薊	Cirsium japonicum
365	Coronary artery spasm, susceptibility to (3)	PON1, PON, ESA	168820	7q21.3	Cardiovascular	侧柏叶	側柏葉	Biota orientalis
365	Coronary heart disease, susceptibility to (3)	MMP3, STMY1	185250	11q23	Cardiovascular	白茅根	白茅根	lmperata cylindrica
2365	Coronary spasms, susceptibility to (3)	NOS3	163729	7q36	Cardiovascular	羊蹄	羊蹄	Yang ti
444	Double-outlet right ventricle, 217095 (3)	CFC1, CRYPTIC, HTX2	605194	2q21.1	Cardiovascular	侧柏叶	側柏葉	Platycladus orientalis
597	Glomuvenous malformations, 138000 (3)	GLML, GVM, VMGLOM	601749	1p22-p21	Cardiovascular	茵陈	茵陳	Virgate wormwood herb
647	Heart block, nonprogressive, 113900 (3)	SCN5A, LQT3, IVF, HB1, SSS1	600163	3p21	Cardiovascular	植物滨蒿	植物濱蒿	Artemisia scoparia
647	Heart block, progressive, type I, 113900 (3)	SCN5A, LQT3, IVF, HB1, SSS1	600163	3p21	Cardiovascular	虎扙	虎扙	Polygonum cuspidatum
669	Hereditary hemorrhagic telangiectasia-1, 187300 (3)	ENG, END, HHT1, ORW	131195	9q34.1	Cardiovascular	地耳草	地耳草	hypericum japonicum
669	Hereditary hemorrhagic telangiectasia-2, 600376 (3)	ACVRL1, ACVRLK1, ALK1, HHT2	601284	12q11-q14	Cardiovascular	垂盆草	垂盆草	Sedum sarmentosum
750	Hyperproreninemia (3)	REN	179820	1q32	Cardiovascular	金钱草	金錢草	Glechoma longituba (Nakai) Kupr.
752	Hypertension, diastolic, resistance to, 608622 (3)	KCNMB1	603951	5q34	Cardiovascular	车前子	車前子	Plantain herb
752	Hypertension, early-onset, autosomal dominant, with exacerbation in pregnancy,605115 (3)	NR3C2, MLR, MCR	600983	4q31.1	Cardiovascular	植物车前	植物車前	Plantago asiatica
752	Hypertension, essential, 145500 (3)	AGTR1, AGTR1A, AT2R1	106165	3q21-q25	Cardiovascular	平车前	平車前	Plantago depressa
752	Hypertension, essential, 145500 (3)	PTGIS, CYP8A1, PGIS, CYP8	601699	20q13.11-q13.13	Cardiovascular	地肤子	地膚子	Kochia scoparia
752	Hypertension, essential, salt-sensitive, 145500 (3)	ADD1	102680	4p16.3	Cardiovascular	萆薢	萆薢	Dioscorea septemloba
752	Hypertension, essential, susceptibility to, 145500 (3)	AGT, SERPINA8	106150	1q42-q43	Cardiovascular	海金沙	海金沙	Lygodium japonicum
752	Hypertension, essential, susceptibility to, 145500 (3)	ECE1	600423	1p36.1	Cardiovascular	通草	通草	Tetrapanax papyriferus
752	Hypertension, essential, susceptibility to, 145500 (3)	GNB3	139130	12p13	Cardiovascular	石韦	石韋	Pyrrosia sheareri
752	Hypertension, insulin resistance-related, susceptibility to, 125853 (3)	RETN, RSTN, FIZZ3	605565	19p13.2	Cardiovascular	瞿麦	瞿麥	Dianthus superbus L.
752	Hypertension, mild low-renin (3)	HSD11B2, HSD11K	218030	16q22	Cardiovascular	石竹	石竹	Dianthus chinensis L.
752	Hypertension, pregnancy-induced, 189800 (3)	NOS3	163729	7q36	Cardiovascular	石竹	石竹	Dianthus superbus
752	Hypertension, salt-sensitive essential, susceptibility to, 145500 (3)	CYP3A5, P450PCN3	605325	7q22.1	Cardiovascular	萹蓄	萹蓄	Polygonum aviculare
752	Hypertension, susceptibility to, 145500 (3)	NOS3	163729	7q36	Cardiovascular	灯心草	燈心草	Common rush
2785	Hypoplastic left heart syndrome, 241550 (3)	GJA1, CX43, ODDD, SDTY3, ODOD	121014	6q21-q23.2	Cardiovascular	瞿麦	瞿麥	Lilac pink herb
875	Left ventricular noncompaction with congenital heart defects, 606617 (3)	DTNA, D18S892E, DRP3, LVNC1	601239	18q12.1-q12.2	Cardiovascular	泽泻	澤瀉	Alisma orientalis
875	Left ventricular noncompaction, familial isolated, 1, 604169 (3)	DTNA, D18S892E, DRP3, LVNC1	601239	18q12.1-q12.2	Cardiovascular	猪苓	豬苓	Polyporus umbellatus
912	Long QT syndrome 4, 600919 (3)	ANK2, LQT4	106410	4q25-q27	Cardiovascular	荠菜	薺菜	Capsella bursapastoris
912	Long QT syndrome-1, 192500 (3)	KCNQ1, KCNA9, LQT1, KVLQT1, ATFB1	607542	11p15.5	Cardiovascular	茯苓	茯苓	Poria cocos
912	Long QT syndrome-2 (3)	KCNH2, LQT2, HERG	152427	7q35-q36	Cardiovascular	葫芦	葫蘆	Calabash
912	Long QT syndrome-3, 603830 (3)	SCN5A, LQT3, IVF, HB1, SSS1	600163	3p21	Cardiovascular	植物葫芦	植物葫蘆	Lagenaria siceraria
912	Long QT syndrome-5 (3)	KCNE1, JLNS, LQT5	176261	21q22.1-q22.2	Cardiovascular	天麻	天麻	Gastrodia elata
912	Long QT syndrome-6 (3)	KCNE2, MIRP1, LQT6	603796	21q22.1	Cardiovascular	钩藤	鉤藤	Gambir plant (uncaria)
912	Long QT syndrome-7, 170390 (3)	KCNJ2, HHIRK1, KIR2.1, IRK1, LQT7	600681	17q23.1-q24.2	Cardiovascular	钩藤	鈎藤	Uncaria rhynchophylla
915	Low renin hypertension, susceptibility to (3)	CYP11B2	124080	8q21	Cardiovascular	大叶钩藤	大葉鈎藤	Uncaria macrophylla
1054	Myocardial infarction susceptibility (3)	APOE, AD2	107741	19q13.2	Cardiovascular	华钩藤	華鈎藤	Uncaria sinensis
1054	Myocardial infarction, decreased susceptibility to (3)	F7	227500	13q34	Cardiovascular	蜈蚣	蜈蚣	Centipede (Scolopendra subspinipes)
1054	Myocardial infarction, susceptibility to (3)	ACE, DCP1, ACE1	106180	17q23	Cardiovascular	僵蚕	僵蠶	Stiff silkworm (Bombyx mori infected with Beauveria bassiana)
1054	Myocardial infarction, susceptibility to (3)	ALOX5AP, FLAP	603700	13q12	Cardiovascular	天麻	天麻	Gastrodia elata
1054	Myocardial infarction, susceptibility to (3)	LGALS2	150571	22q13.1	Cardiovascular	牛黄	牛黃	Bos taurus domesticus Gmelin
1054	Myocardial infarction, susceptibility to (3)	LTA, TNFB	153440	6p21.3	Cardiovascular	牛黄	牛黃	Bubalus bubalis Linnaeus
1054	Myocardial infarction, susceptibility to (3)	OLR1, LOX1	602601	12p13-p12	Cardiovascular	全蠍	全蠍	Buthus martensi Karsch
1054	Myocardial infarction, susceptibility to (3)	THBD, THRM	188040	20p11.2	Cardiovascular	钩藤	鉤藤	Uncaria rhynchophylla (Miq.) jacks.
1054	Myocardial infarction, susceptibility to, 608446 (3)	GCLM, GLCLR	601176	1p22.1	Cardiovascular	槐花	槐花	Sophora japonica
1054	Myocardial infarction, susceptibility to, 608446 (3)	TNFSF4, GP34, OX4OL	603594	1q25	Cardiovascular	小蓟	小薊	Cirsium setosum
1066	Myxoma, intracardiac, 255960 (3)	PRKAR1A, TSE1, CNC1, CAR	188830	17q23-q24	Cardiovascular	地榆	地榆	Sanguisorba officinalis
1113	Noncompaction of left ventricular myocardium, isolated, 300183 (3)	TAZ, EFE2, BTHS, CMD3A, LVNCX	300394	Xq28	Cardiovascular	苎麻根	苧麻根	Boehmeria nivea
1150	Orthostatic intolerance, 604715 (3)	SLC6A2, NAT1, NET1	163970	16q12.2	Cardiovascular	白茅根	白茅根	Imperata cylindrica
1257	Preeclampsia, susceptibility to (3)	AGT, SERPINA8	106150	1q42-q43	Cardiovascular	羊蹄	羊蹄	Rumex japonicus Houtt.
1257	Preeclampsia, susceptibility to, 189800 (3)	EPHX1	132810	1q42.1	Cardiovascular	草本植物羊蹄	草本植物羊蹄	Rumex japonicus
1257	Preeclampsia/eclampsia 4 (3)	STOX1, PEE4	609397	10q22.1	Cardiovascular	尼泊尔羊蹄	尼泊爾羊蹄	Rumex nepalensis
5291	Pulmonary hypertension, familial primary, 178600 (3)	BMPR2, PPH1	600799	2q33	Cardiovascular	大蓟	大薊	Cirsium japonicum
1312	Resting heart rate, 607276 (3)	ADRB1, ADRB1R, RHR	109630	10q24-q26	Cardiovascular	侧柏叶	側柏葉	Biota orientalis
1394	Sick sinus syndrome, 608567 (3)	SCN5A, LQT3, IVF, HB1, SSS1	600163	3p21	Cardiovascular	白茅根	白茅根	lmperata cylindrica
1454	Stroke, susceptibility to, 1, 606799 (3)	PDE4D, DPDE3, STRK1	600129	5q12	Cardiovascular	羊蹄	羊蹄	Yang ti
1454	Stroke, susceptibility to, 601367 (3)	ALOX5AP, FLAP	603700	13q12	Cardiovascular	侧柏叶	側柏葉	Platycladus orientalis
1463	Supravalvar aortic stenosis, 185500 (3)	ELN	130160	7q11.2	Cardiovascular	茵陈	茵陳	Virgate wormwood herb
1483	Tetralogy of Fallot, 187500 (3)	JAG1, AGS, AHD	601920	20p12	Cardiovascular	植物滨蒿	植物濱蒿	Artemisia scoparia
1483	Tetralogy of Fallot, 187500 (3)	ZFPM2, FOG2	603693	8q23	Cardiovascular	虎扙	虎扙	Polygonum cuspidatum
1483	Tetrology of Fallot, 187500 (3)	NKX2E, CSX	600584	5q34	Cardiovascular	地耳草	地耳草	hypericum japonicum
1557	Venous malformations, multiple cutaneous and mucosal, 600195 (3)	TEK, TIE2, VMCM	600221	9p21	Cardiovascular	垂盆草	垂盆草	Sedum sarmentosum
1557	Venous thrombosis, susceptibility to (3)	SERPINA10, ZPI	605271	14q32.1	Cardiovascular	金钱草	金錢草	Glechoma longituba (Nakai) Kupr.
3558	Ventricular fibrillation, idiopathic, 603829 (3)	SCN5A, LQT3, IVF, HB1, SSS1	600163	3p21	Cardiovascular	侧柏叶	側柏葉	Biota orientalis
1558	Ventricular tachycardia, idiopathic, 192605 (3)	GNAI2, GNAI2B, GIP	139360	3p21	Cardiovascular	白茅根	白茅根	lmperata cylindrica
1558	Ventricular tachycardia, stress-induced polymorphic, 604772 (3)	CASQ2	114251	1p13.3-p11	Cardiovascular	羊蹄	羊蹄	Yang ti
1558	Ventricular tachycardia, stress-induced polymorphic, 604772 (3)	RYR2, VTSIP	180902	1q42.1-q43	Cardiovascular	侧柏叶	側柏葉	Biota orientalis
1601	Wolff-Parkinson-White syndrome, 194200 (3)	PRKAG2, WPWS	602743	7q36	Cardiovascular	白茅根	白茅根	lmperata cylindrica
121	Ankylosing spoldylitis, susceptibility to, 106300 (3)	HLA-B	142830	6p21.3	Connective tissue	三七	三七	Panax notoginseng	stasis-resolving hemostatic medicinal
131	Apert syndrome, 101200 (3)	FGFR2, BEK, CFD1, JWS	176943	10q26	Connective tissue	茜草	茜草	Rubia cordifolia	stasis-resolving hemostatic medicinal
160	Atelosteogenesis II, 256050 (3)	SLC26A2, DTD, DTDST, D5S1708, EDM4	606718	5q32-q33.1	Connective tissue	蒲黄	蒲黃	Cattail pollen	stasis-resolving hemostatic medicinal
160	Atelostogenesis, type I, 108720 (3)	FLNB, SCT, AOI	603381	3p14.3	Connective tissue	水烛香蒲	水燭香蒲	Typha angustifolia	stasis-resolving hemostatic medicinal
253	Caffey disease, 114000 (3)	COL1A1	120150	17q21.31-q22	Connective tissue	降香	降香	Dalbergia odorifera	stasis-resolving hemostatic medicinal
315	Chondrodysplasia punctata, rhizomelic, type 2, 222765 (3)	GNPAT, DHAPAT	602744	1q42	Connective tissue	蒲黄	蒲黃	Typha angustata Bory et Chaub.	stasis-resolving hemostatic medicinal
315	Chondrodysplasia punctata, X-linked dominant, 302960 (3)	EBP, CDPX2, CPXD, CPX	300205	Xp11.23-p11.22	Connective tissue	白及	白及	Bletilla striata	astringent hemostatic medicinal
315	Chondrodysplasia punctata, X-linked recessive, 302950 (3)	ARSE, CDPX1, CDPXR	300180	Xp22.3	Connective tissue	藕节	藕節	Nelumbo nucifera	astringent hemostatic medicinal
358	Contractural arachnodactyly, congenital (3)	FBN2, CCA	121050	5q23-q31	Connective tissue	仙鹤草	仙鶴草	Agrimonia pilosa	astringent hemostatic medicinal
395	Cutis laxa, AD, 123700 (3)	ELN	130160	7q11.2	Connective tissue	松花粉	松花粉	Pine pollen	astringent hemostatic medicinal
395	Cutis laxa, autosomal dominant, 123700 (3)	FBLN5, ARMD3	604580	14q32.1	Connective tissue	马尾松	馬尾松	Pinus massoniana	astringent hemostatic medicinal
395	Cutis laxa, autosomal recessive, 219100 (3)	FBLN5, ARMD3	604580	14q32.1	Connective tissue	三七	三七	Panax notoginseng
395	Cutis laxa, neonatal (3)	ATP7A, MNK, MK, OHS	300011	Xq12-q13	Connective tissue	茜草	茜草	Rubia cordifolia
439	Dissection of cervical arteries (3)	COL1A1	120150	17q21.31-q22	Connective tissue	蒲黄	蒲黃	Cattail pollen
470	Ehlers-Danlos due to tenascin X deficiency, 606408 (3)	TNXB, TNX, TNXB1, TNXBS, TNXB2	600985	6p21.3	Connective tissue	水烛香蒲	水燭香蒲	Typha angustifolia
470	Ehlers-Danlos syndrome, hypermobility type, 130020 (3)	TNXB, TNX, TNXB1, TNXBS, TNXB2	600985	6p21.3	Connective tissue	降香	降香	Dalbergia odorifera
470	Ehlers-Danlos syndrome, progeroid form, 130070 (3)	B4GALT7, XGALT1, XGPT1	604327	5q35.2-q35.3	Connective tissue	蒲黄	蒲黃	Typha angustata Bory et Chaub.
470	Ehlers-Danlos syndrome, type I, 130000 (3)	COL1A1	120150	17q21.31-q22	Connective tissue	白及	白及	Bletilla striata
470	Ehlers-Danlos syndrome, type I, 130000 (3)	COL5A1	120215	9q34.2-q34.3	Connective tissue	藕节	藕節	Nelumbo nucifera
470	Ehlers-Danlos syndrome, type I, 130000 (3)	COL5A2	120190	2q31	Connective tissue	仙鹤草	仙鶴草	Agrimonia pilosa
470	Ehlers-Danlos syndrome, type II, 130010 (3)	COL5A1	120215	9q34.2-q34.3	Connective tissue	松花粉	松花粉	Pine pollen
470	Ehlers-Danlos syndrome, type III, 130020 (3)	COL3A1	120180	2q31	Connective tissue	马尾松	馬尾松	Pinus massoniana
470	Ehlers-Danlos syndrome, type IV, 130050 (3)	COL3A1	120180	2q31	Connective tissue	三七	三七	Panax notoginseng
470	Ehlers-Danlos syndrome, type VI, 225400 (3)	PLOD, PLOD1	153454	1p36.3-p36.2	Connective tissue	茜草	茜草	Rubia cordifolia
470	Ehlers-Danlos syndrome, type VII, 130060 (3)	COL1A1	120150	17q21.31-q22	Connective tissue	蒲黄	蒲黃	Cattail pollen
470	Ehlers-Danlos syndrome, type VIIA2, 130060 (3)	COL1A2	120160	7q22.1	Connective tissue	水烛香蒲	水燭香蒲	Typha angustifolia
470	Ehlers-Danlos syndrome, type VIIC, 225410 (3)	ADAMTS2, NPI	604539	5q23	Connective tissue	降香	降香	Dalbergia odorifera
537	Fibromatosis, gingival, 135300 (3)	SOS1, GINGF, GF1, HGF	182530	2p22-p21	Connective tissue	蒲黄	蒲黃	Typha angustata Bory et Chaub.
537	Fibromatosis, juvenile hyaline, 228600 (3)	ANTXR2, CMG2, JHF, ISH	608041	4q21	Connective tissue	白及	白及	Bletilla striata
785	Hypoplastic enamel pitting, localized, 608563 (3)	ENAM	606585	4q21	Connective tissue	藕节	藕節	Nelumbo nucifera
910	Loeys-Dietz syndrome, 609192 (3)	TGFBR1	190181	9q33-q34	Connective tissue	仙鹤草	仙鶴草	Agrimonia pilosa
910	Loeys-Dietz syndrome, 609192 (3)	TGFBR2, HNPCC6	190182	3p22	Connective tissue	松花粉	松花粉	Pine pollen
919	Lupus nephritis, susceptibility to (3)	FCGR2A, IGFR2, CD32	146790	1q21-q23	Connective tissue	马尾松	馬尾松	Pinus massoniana
950	Marfan syndrome, 154700 (3)	FBN1, MFS1, WMS	134797	15q21.1	Connective tissue	三七	三七	Panax notoginseng
950	Marfan syndrome, atypical (3)	COL1A2	120160	7q22.1	Connective tissue	茜草	茜草	Rubia cordifolia
957	MASS syndrome, 604308 (3)	FBN1, MFS1, WMS	134797	15q21.1	Connective tissue	蒲黄	蒲黃	Cattail pollen
997	Metaphyseal chondrodysplasia, Murk Jansen type, 156400 (3)	PTHR1, PTHR	168468	3p22-p21.1	Connective tissue	水烛香蒲	水燭香蒲	Typha angustifolia
997	Metaphyseal chondrodysplasia, Schmid type (3)	COL10A1	120110	6q21-q22.3	Connective tissue	降香	降香	Dalbergia odorifera
997	Metaphyseal dysplasia without hypotrichosis, 250460 (3)	RMRP, RMRPR, CHH	157660	9p21-p12	Connective tissue	蒲黄	蒲黃	Typha angustata Bory et Chaub.
1103	Nevo syndrome, 601451 (3)	PLOD, PLOD1	153454	1p36.3-p36.2	Connective tissue	白及	白及	Bletilla striata
1153	Ossification of posterior longitudinal ligament of spine, 602475 (3)	ENPP1, PDNP1, NPPS, M6S1, PCA1	173335	6q22-q23	Connective tissue	藕节	藕節	Nelumbo nucifera
1154	Osteoarthritis of hip, female-specific, susceptibility to, 165720 (3)	FRZB, FRZB1, SRFP3	605083	2q31-q33	Connective tissue	仙鹤草	仙鶴草	Agrimonia pilosa
1154	Osteoarthritis, hand, susceptibility to, 607850 (3)	MATN3, EDM5, HOA	602109	2p24-p23	Connective tissue	松花粉	松花粉	Pine pollen
1154	Osteoarthritis, susceptibility to, 165720 (3)	ASPN, PLAP1	608135	9q21.3-q22	Connective tissue	马尾松	馬尾松	Pinus massoniana
1154	Osteoarthrosis, 165720 (3)	COL2A1	120140	12q13.11-q13.2	Connective tissue	三七	三七	Panax notoginseng
1268	Prolidase deficiency (3)	PEPD	170100	19cen-q13.11	Connective tissue	茜草	茜草	Rubia cordifolia
1285	Pseudoxanthoma elasticum, autosomal dominant, 177850 (3)	ABCC6, ARA, ABC34, MLP1, PXE	603234	16p13.1	Connective tissue	蒲黄	蒲黃	Cattail pollen
1285	Pseudoxanthoma elasticum, autosomal recessive, 264800 (3)	ABCC6, ARA, ABC34, MLP1, PXE	603234	16p13.1	Connective tissue	水烛香蒲	水燭香蒲	Typha angustifolia
1324	Rheumatoid arthritis, progression of, 180300 (3)	IL10, CSIF	124092	1q31-q32	Connective tissue	降香	降香	Dalbergia odorifera
1324	Rheumatoid arthritis, susceptibility to, 180300 (3)	MHC2TA, C2TA	600005	16p13	Connective tissue	蒲黄	蒲黃	Typha angustata Bory et Chaub.
1324	Rheumatoid arthritis, susceptibility to, 180300 (3)	NFKBIL1	601022	6p21.3	Connective tissue	白及	白及	Bletilla striata
1324	Rheumatoid arthritis, susceptibility to, 180300 (3)	PADI4, PADI5, PAD	605347	1p36	Connective tissue	藕节	藕節	Nelumbo nucifera
1324	Rheumatoid arthritis, susceptibility to, 180300 (3)	PTPN8, PEP, PTPN22, LYP	600716	1p13	Connective tissue	仙鹤草	仙鶴草	Agrimonia pilosa
1324	Rheumatoid arthritis, susceptibility to, 180300 (3)	RUNX1, CBFA2, AML1	151385	21q22.3	Connective tissue	松花粉	松花粉	Pine pollen
1324	Rheumatoid arthritis, susceptibility to, 180300 (3)	SLC22A4, OCTN1	604190	5q31	Connective tissue	马尾松	馬尾松	Pinus massoniana
1324	Rheumatoid arthritis, systemic juvenile, susceptibility to, 604302 (3)	MIF	153620	22q11.2	Connective tissue	三七	三七	Panax notoginseng
1354	Schimke immunoosseous dysplasia, 242900 (3)	SMARCAL1, HARP, SIOD	606622	2q34-q36	Connective tissue	茜草	茜草	Rubia cordifolia
1374	SEMD, Pakistani type (3)	PAPSS2, ATPSK2	603005	10q22-q24	Connective tissue	蒲黄	蒲黃	Cattail pollen
1585	Weill-Marchesani syndrome, dominant, 608328 (3)	FBN1, MFS1, WMS	134797	15q21.1	Connective tissue	水烛香蒲	水燭香蒲	Typha angustifolia
1585	Weill-Marchesani syndrome, recessive, 277600 (3)	ADAMTS10, WMS	608990	19p13.3-p13.2	Connective tissue	降香	降香	Dalbergia odorifera
1586	Weissenbacher-Zweymuller syndrome, 277610 (3)	COL11A2, STL3, DFNA13	120290	6p21.3	Connective tissue	蒲黄	蒲黃	Typha angustata Bory et Chaub.
1592	White sponge nevus, 193900 (3)	KRT13	148065	17q21-q22	Connective tissue	白及	白及	Bletilla striata
1592	White sponge nevus, 193900 (3)	KRT4, CYK4	123940	12q13	Connective tissue	藕节	藕節	Nelumbo nucifera
314	Chondrocalcinosis 2, 118600 (3)	ANKH, HANK, ANK, CMDJ, CCAL2, CPPDD	605145	5p15.2-p14.1	Connective tissue	仙鹤草	仙鶴草	Agrimonia pilosa
34	Acrodermatitis enteropathica, 201100 (3)	SLC39A4, ZIP4	607059	8q24.3	Dermatological	半夏	半夏	Pinellia ternata	cough-suppressing and panting-calming medicinal
36	Acrokeratosis verruciformis, 101900 (3)	ATP2A2, ATP2B, DAR	108740	12q23-q24.1	Dermatological	旋覆花	旋覆花	Inula britannica L.	cough-suppressing and panting-calming medicinal
72	Albinism, brown oculocutaneous, (3)	OCA2, P, PED, D15S12, BOCA	203200	15q11.2-q12	Dermatological	菊科植物旋覆花	菊科植物旋覆花	Inula japonica	cough-suppressing and panting-calming medicinal
72	Albinism, ocular, autosomal recessive (3)	OCA2, P, PED, D15S12, BOCA	203200	15q11.2-q12	Dermatological	欧亚旋覆花	歐亞旋覆花	Inula Britannica	cough-suppressing and panting-calming medicinal
72	Albinism, oculocutaneous, type IA, 203100 (3)	TYR	606933	11q14-q21	Dermatological	天南星	天南星	Arisaema amurense	cough-suppressing and panting-calming medicinal
72	Albinism, oculocutaneous, type IB, 606952 (3)	TYR	606933	11q14-q21	Dermatological	天南星	天南星	Arisaema consanguineum Schott	cough-suppressing and panting-calming medicinal
72	Albinism, oculocutaneous, type II (3)	OCA2, P, PED, D15S12, BOCA	203200	15q11.2-q12	Dermatological	白前	白前	Cynanchum stauntonii	cough-suppressing and panting-calming medicinal
72	Albinism, rufous, 278400 (3)	TYRP1, CAS2, GP75	115501	9p23	Dermatological	白前	白前	Willowleaf Swallowwort Rhizome	cough-suppressing and panting-calming medicinal
85	Alopecia universalis, 203655 (3)	HR, AU	602302	8p21.2	Dermatological	芥子	芥子	Mustard Seed	cough-suppressing and panting-calming medicinal
167	Atrichia with papular lesions, 209500 (3)	HR, AU	602302	8p21.2	Dermatological	白芥子	白芥子	Brassica juncea	cough-suppressing and panting-calming medicinal
205	Birt-Hogg-Dube syndrome, 135150 (3)	FLCN, BHD	607273	17p11.2	Dermatological	白芥子	白芥子	Sinapis alba L.	cough-suppressing and panting-calming medicinal
396	Cyclic ichthyosis with epidermolytic hyperkeratosis, 607602 (3)	KRT1	139350	12q13	Dermatological	沙棘	沙棘	Hippophae rhamnoides	cough-suppressing and panting-calming medicinal
397	Cylindromatosis, familial, 132700 (3)	CYLD1, CDMT, EAC	605018	16q12-q13	Dermatological	皂荚	皂莢	Gleditsia horrida	cough-suppressing and panting-calming medicinal
404	Darier disease, 124200 (3)	ATP2A2, ATP2B, DAR	108740	12q23-q24.1	Dermatological	天南星	天南星	Jackinthepulpit Tuber	cough-suppressing and panting-calming medicinal
455	Dyschromatosis symmetrica hereditaria, 127400 (3)	ADAR, DRADA, DSH, DSRAD	601059	1q21.3	Dermatological	皂荚	皂莢	Gleditsia sinensis	cough-suppressing and panting-calming medicinal
458	Dyskeratosis congenita, autosomal dominant, 127550 (3)	TERC, TRC3, TR	602322	3q21-q28	Dermatological	禹白附	禹白附	Typhoniun giganteum Engl	cough-suppressing and panting-calming medicinal
458	Dyskeratosis congenita-1, 305000 (3)	DKC1, DKC	300126	Xq28	Dermatological	旋覆花	旋覆花	Inula Flower	cough-suppressing and panting-calming medicinal
465	EBD, Bart type, 132000 (3)	COL7A1	120120	3p21.3	Dermatological	银杏	銀杏	Ginkgo Biloba	cough-suppressing and panting-calming medicinal
465	EBD, localisata variant (3)	COL7A1	120120	3p21.3	Dermatological	紫菀	紫菀	Aster tataricus	cough-suppressing and panting-calming medicinal
466	Ectodermal dysplasia 2, hidrotic, 129500 (3)	GJB6, CX30, DFNA3, HED, ED2	604418	13q12	Dermatological	苏子	蘇子	Perilla frutescens	cough-suppressing and panting-calming medicinal
466	Ectodermal dysplasia, anhidrotic, 224900 (3)	EDARADD	606603	1q42.2-q43	Dermatological	桑白皮	桑白皮	Morus alba	cough-suppressing and panting-calming medicinal
466	Ectodermal dysplasia, anhidrotic, lymphedema and immunodeficiency, 300301 (3)	IKBKG, NEMO, FIP3, IP2	300248	Xq28	Dermatological	百部	百部	Stemona Root	cough-suppressing and panting-calming medicinal
466	Ectodermal dysplasia, anhidrotic, with T-cell immunodeficiency (3)	NFKBIA, IKBA	164008	14q13	Dermatological	直立百部	直立百部	Stemona sessilifolia	cough-suppressing and panting-calming medicinal
466	Ectodermal dysplasia, hypohidrotic, autosomal dominant, 129490 (3)	EDAR, DL, ED3, EDA3	604095	2q11-q13	Dermatological	蔓生百部	蔓生百部	Stemona japonica	cough-suppressing and panting-calming medicinal
466	Ectodermal dysplasia, hypohidrotic, autosomal recessive, 224900 (3)	EDAR, DL, ED3, EDA3	604095	2q11-q13	Dermatological	对叶百部	對葉百部	Stemona tuberosa	cough-suppressing and panting-calming medicinal
466	Ectodermal dysplasia, hypohidrotic, with immune deficiency, 300291 (3)	IKBKG, NEMO, FIP3, IP2	300248	Xq28	Dermatological	款冬花	款冬花	Tussilago farfara	cough-suppressing and panting-calming medicinal
466	Ectodermal dysplasia, Margarita Island type, 225060 (3)	HVEC, PVRL1, PVRR1, PRR1	600644	11q23-q24	Dermatological	葶苈子	葶藶子	Lepidium apetalum Willd.	cough-suppressing and panting-calming medicinal
466	Ectodermal dysplasia/skin fragility syndrome, 604536 (3)	PKP1	601975	1q32	Dermatological	南葶苈子	南葶藶子	Descurainia sophia	cough-suppressing and panting-calming medicinal
466	Ectodermal dysplasia-1, anhidrotic, 305100 (3)	ED1, EDA, HED	300451	Xq12-q13.1	Dermatological	枇杷叶	枇杷葉	Eriobotrya japonica	cough-suppressing and panting-calming medicinal
492	Epidermodysplasia verruciformis, 226400 (3)	EVER1, EV1	605828	17q25	Dermatological	矮地茶	矮地茶	Ardisia japonica	cough-suppressing and panting-calming medicinal
492	Epidermodysplasia verruciformis, 226400 (3)	EVER2, EV2	605829	17q25	Dermatological	百部	百部	Stemona tuberosa Lour.	cough-suppressing and panting-calming medicinal
493	Epidermolysis bullosa dystrophica, AD, 131750 (3)	COL7A1	120120	3p21.3	Dermatological	葶苈子	葶藶子	Pepperweed Seed	cough-suppressing and panting-calming medicinal
493	Epidermolysis bullosa dystrophica, AR, 226600 (3)	COL7A1	120120	3p21.3	Dermatological	半夏	半夏	Pinellia ternata	cough-suppressing and panting-calming medicinal
493	Epidermolysis bullosa of hands and feet, 131800 (3)	ITGB4	147557	17q11-qter	Dermatological	旋覆花	旋覆花	Inula britannica L.	cough-suppressing and panting-calming medicinal
493	Epidermolysis bullosa pruriginosa, 604129 (3)	COL7A1	120120	3p21.3	Dermatological	菊科植物旋覆花	菊科植物旋覆花	Inula japonica	cough-suppressing and panting-calming medicinal
493	Epidermolysis bullosa simplex with mottled pigmentation, 131960 (3)	KRT5	148040	12q13	Dermatological	欧亚旋覆花	歐亞旋覆花	Inula Britannica	cough-suppressing and panting-calming medicinal
493	Epidermolysis bullosa simplex, Koebner, Dowling-Meara, and Weber-Cockayne types,131900, 131760, 131800 (3)	KRT14	148066	17q12-q21	Dermatological	天南星	天南星	Arisaema amurense	cough-suppressing and panting-calming medicinal
493	Epidermolysis bullosa simplex, Koebner, Dowling-Meara, and Weber-Cockayne types,131900, 131760, 131800 (3)	KRT5	148040	12q13	Dermatological	天南星	天南星	Arisaema consanguineum Schott	cough-suppressing and panting-calming medicinal
493	Epidermolysis bullosa simplex, Ogna type, 131950 (3)	PLEC1, PLTN, EBS1	601282	8q24	Dermatological	白前	白前	Cynanchum stauntonii	cough-suppressing and panting-calming medicinal
493	Epidermolysis bullosa simplex, recessive, 601001 (3)	KRT14	148066	17q12-q21	Dermatological	白前	白前	Willowleaf Swallowwort Rhizome	cough-suppressing and panting-calming medicinal
493	Epidermolysis bullosa, generalized atrophic benign, 226650 (3)	COL17A1, BPAG2	113811	10q24.3	Dermatological	芥子	芥子	Mustard Seed	cough-suppressing and panting-calming medicinal
493	Epidermolysis bullosa, generalized atrophic benign, 226650 (3)	ITGB4	147557	17q11-qter	Dermatological	白芥子	白芥子	Brassica juncea	cough-suppressing and panting-calming medicinal
493	Epidermolysis bullosa, generalized atrophic benign, 226650 (3)	LAMA3, LOCS	600805	18q11.2	Dermatological	白芥子	白芥子	Sinapis alba L.	cough-suppressing and panting-calming medicinal
493	Epidermolysis bullosa, generalized atrophic benign, 226650 (3)	LAMB3	150310	1q32	Dermatological	沙棘	沙棘	Hippophae rhamnoides	cough-suppressing and panting-calming medicinal
493	Epidermolysis bullosa, generalized atrophic benign, 226650 (3)	LAMC2, LAMNB2, LAMB2T	150292	1q25-q31	Dermatological	皂荚	皂莢	Gleditsia horrida	cough-suppressing and panting-calming medicinal
493	Epidermolysis bullosa, Herlitz junctional type, 226700 (3)	LAMB3	150310	1q32	Dermatological	天南星	天南星	Jackinthepulpit Tuber	cough-suppressing and panting-calming medicinal
493	Epidermolysis bullosa, Herlitz junctional type, 226700 (3)	LAMC2, LAMNB2, LAMB2T	150292	1q25-q31	Dermatological	皂荚	皂莢	Gleditsia sinensis	cough-suppressing and panting-calming medicinal
493	Epidermolysis bullosa, junctional, Herlitz type, 226700 (3)	LAMA3, LOCS	600805	18q11.2	Dermatological	禹白附	禹白附	Typhoniun giganteum Engl	cough-suppressing and panting-calming medicinal
493	Epidermolysis bullosa, junctional, with pyloric atresia, 226730 (3)	ITGB4	147557	17q11-qter	Dermatological	旋覆花	旋覆花	Inula Flower	cough-suppressing and panting-calming medicinal
493	Epidermolysis bullosa, junctional, with pyloric stenosis, 226730 (3)	ITGA6	147556	Chr.2	Dermatological	银杏	銀杏	Ginkgo Biloba	cough-suppressing and panting-calming medicinal
493	Epidermolysis bullosa, lethal acantholytic, 609638 (3)	DSP, KPPS2, PPKS2	125647	6p24	Dermatological	紫菀	紫菀	Aster tataricus	cough-suppressing and panting-calming medicinal
493	Epidermolysis bullosa, pretibial, 131850 (3)	COL7A1	120120	3p21.3	Dermatological	苏子	蘇子	Perilla frutescens	cough-suppressing and panting-calming medicinal
494	Epidermolytic hyperkeratosis, 113800 (3)	KRT10	148080	17q21-q22	Dermatological	桑白皮	桑白皮	Morus alba	cough-suppressing and panting-calming medicinal
494	Epidermolytic hyperkeratosis, 113800 (3)	KRT1	139350	12q13	Dermatological	百部	百部	Stemona Root	cough-suppressing and panting-calming medicinal
494	Epidermolytic palmoplantar keratoderma, 144200 (3)	KRT9, EPPK	607606	17q12-q21	Dermatological	直立百部	直立百部	Stemona sessilifolia	cough-suppressing and panting-calming medicinal
507	Erythrokeratoderma, progressive symmetric, 602036 (3)	LOR	152445	1q21	Dermatological	蔓生百部	蔓生百部	Stemona japonica	cough-suppressing and panting-calming medicinal
507	Erythrokeratodermia variabilis with erythema gyratum repens, 133200 (3)	GJB4, CX30.3	605425	1p35.1	Dermatological	对叶百部	對葉百部	Stemona tuberosa	cough-suppressing and panting-calming medicinal
507	Erythrokeratodermia variabilis, 133200 (3)	GJB3, CX31, DFNA2	603324	1p35.1	Dermatological	款冬花	款冬花	Tussilago farfara	cough-suppressing and panting-calming medicinal
627	Griscelli syndrome, type 1, 214450 (3)	MYO5A, MYH12, GS1	160777	15q21	Dermatological	葶苈子	葶藶子	Lepidium apetalum Willd.	cough-suppressing and panting-calming medicinal
627	Griscelli syndrome, type 2, 607624 (3)	RAB27A, RAM, GS2	603868	15q21	Dermatological	南葶苈子	南葶藶子	Descurainia sophia	cough-suppressing and panting-calming medicinal
627	Griscelli syndrome, type 3, 609227 (3)	MLPH	606526	2q37	Dermatological	枇杷叶	枇杷葉	Eriobotrya japonica	cough-suppressing and panting-calming medicinal
633	Hailey-Hailey disease, 169600 (3)	ATP2C1, BCPM, HHD	604384	3q21-q24	Dermatological	矮地茶	矮地茶	Ardisia japonica	cough-suppressing and panting-calming medicinal
788	Hypotrichosis simplex of scalp, 146520 (3)	CDSN, HTSS	602593	6p21.3	Dermatological	百部	百部	Stemona tuberosa Lour.	cough-suppressing and panting-calming medicinal
788	Hypotrichosis, congential, with juvenile macular dystrophy, 601553 (3)	CDH3, CDHP, PCAD, HJMD	114021	16q22.1	Dermatological	葶苈子	葶藶子	Pepperweed Seed	cough-suppressing and panting-calming medicinal
788	Hypotrichosis, localized, autosomal recessive, 607903 (3)	DSG4, LAH	607892	18q12	Dermatological	半夏	半夏	Pinellia ternata	cough-suppressing and panting-calming medicinal
788	Hypotrichosis-lymphedema-telangiectasia syndrome, 607823 (3)	SOX18, HLTS	601618	20q13.33	Dermatological	旋覆花	旋覆花	Inula britannica L.	cough-suppressing and panting-calming medicinal
793	Ichthyosiform erythroderma, congenital, 242100 (3)	TGM1, ICR2, LI1	190195	14q11.2	Dermatological	菊科植物旋覆花	菊科植物旋覆花	Inula japonica	cough-suppressing and panting-calming medicinal
793	Ichthyosiform erythroderma, congenital, nonbullous, 1, 242100 (3)	ALOX12B	603741	17pter-p13.1	Dermatological	欧亚旋覆花	歐亞旋覆花	Inula Britannica	cough-suppressing and panting-calming medicinal
793	Ichthyosiform erythroderma, congenital, nonbullous, 1, 242100 (3)	ALOXE3	607206	17p13.1	Dermatological	天南星	天南星	Arisaema amurense	cough-suppressing and panting-calming medicinal
794	Ichthyosis bullosa of Siemens, 146800 (3)	KRT2A, KRT2E	600194	12q11-q13	Dermatological	天南星	天南星	Arisaema consanguineum Schott	cough-suppressing and panting-calming medicinal
794	Ichthyosis histrix, Curth-Macklin type, 146590 (3)	KRT1	139350	12q13	Dermatological	白前	白前	Cynanchum stauntonii	cough-suppressing and panting-calming medicinal
794	Ichthyosis, congenital, autosomal recessive (3)	ICHYN	609383	5q33	Dermatological	白前	白前	Willowleaf Swallowwort Rhizome	cough-suppressing and panting-calming medicinal
794	Ichthyosis, cyclic, with epidermolytic hyperkeratosis, 607602 (3)	KRT10	148080	17q21-q22	Dermatological	芥子	芥子	Mustard Seed	cough-suppressing and panting-calming medicinal
794	Ichthyosis, harlequin, 242500 (3)	ABCA12, ICR2B, LI2	607800	2q34	Dermatological	白芥子	白芥子	Brassica juncea	cough-suppressing and panting-calming medicinal
794	Ichthyosis, lamellar 2, 601277 (3)	ABCA12, ICR2B, LI2	607800	2q34	Dermatological	白芥子	白芥子	Sinapis alba L.	cough-suppressing and panting-calming medicinal
794	Ichthyosis, lamellar, autosomal recessive, 242300 (3)	TGM1, ICR2, LI1	190195	14q11.2	Dermatological	沙棘	沙棘	Hippophae rhamnoides	cough-suppressing and panting-calming medicinal
794	Ichthyosis, X-linked (3)	STS, ARSC1, ARSC, SSDD	308100	Xp22.32	Dermatological	皂荚	皂莢	Gleditsia horrida	cough-suppressing and panting-calming medicinal
806	Incontinentia pigmenti, type II, 308300 (3)	IKBKG, NEMO, FIP3, IP2	300248	Xq28	Dermatological	天南星	天南星	Jackinthepulpit Tuber	cough-suppressing and panting-calming medicinal
845	Keratoderma, palmoplantar, with deafness, 148350 (3)	GJB2, CX26, DFNB1, PPK, DFNA3, KID, HID	121011	13q11-q12	Dermatological	皂荚	皂莢	Gleditsia sinensis	cough-suppressing and panting-calming medicinal
847	Keratosis follicularis spinulosa decalvans, 308800 (3)	SAT, SSAT, KFSD	313020	Xp22.1	Dermatological	禹白附	禹白附	Typhoniun giganteum Engl	cough-suppressing and panting-calming medicinal
847	Keratosis palmoplantaria striata, 148700 (3)	KRT1	139350	12q13	Dermatological	旋覆花	旋覆花	Inula Flower	cough-suppressing and panting-calming medicinal
847	Keratosis palmoplantaris striata I, 148700 (3)	DSG1	125670	18q12.1-q12.2	Dermatological	银杏	銀杏	Ginkgo Biloba	cough-suppressing and panting-calming medicinal
847	Keratosis palmoplantaris striata II (3)	DSP, KPPS2, PPKS2	125647	6p24	Dermatological	紫菀	紫菀	Aster tataricus	cough-suppressing and panting-calming medicinal
847	Keratosis palmoplantaris striata III, 607654 (3)	KRT1	139350	12q13	Dermatological	苏子	蘇子	Perilla frutescens	cough-suppressing and panting-calming medicinal
850	Kindler syndrome, 173650 (3)	KIND1, URP1, C20orf42	607900	20p13	Dermatological	桑白皮	桑白皮	Morus alba	cough-suppressing and panting-calming medicinal
979	Meleda disease, 248300 (3)	SLURP1, MDM	606119	8qter	Dermatological	百部	百部	Stemona Root	cough-suppressing and panting-calming medicinal
1024	Monilethrix, 158000 (3)	KRTHB1, HB1	602153	12q13	Dermatological	直立百部	直立百部	Stemona sessilifolia	cough-suppressing and panting-calming medicinal
1024	Monilethrix, 158000 (3)	KRTHB6, HB6	601928	12q13	Dermatological	蔓生百部	蔓生百部	Stemona japonica	cough-suppressing and panting-calming medicinal
1088	Netherton syndrome, 256500 (3)	SPINK5, LEKTI	605010	5q32	Dermatological	对叶百部	對葉百部	Stemona tuberosa	cough-suppressing and panting-calming medicinal
1104	Nevus, epidermal, epidermolytic hyperkeratotic type, 600648 (3)	KRT10	148080	17q21-q22	Dermatological	款冬花	款冬花	Tussilago farfara	cough-suppressing and panting-calming medicinal
1172	Pachyonychia congenita, Jackson-Lawler type, 167210 (3)	KRT17, PC2, PCHC1	148069	17q12-q21	Dermatological	葶苈子	葶藶子	Lepidium apetalum Willd.	cough-suppressing and panting-calming medicinal
1172	Pachyonychia congenita, Jackson-Lawler type, 167210 (3)	KRT6B, PC2	148042	12q13	Dermatological	南葶苈子	南葶藶子	Descurainia sophia	cough-suppressing and panting-calming medicinal
1172	Pachyonychia congenita, Jadassohn-Lewandowsky type, 167200 (3)	KRT16	148067	17q12-q21	Dermatological	枇杷叶	枇杷葉	Eriobotrya japonica	cough-suppressing and panting-calming medicinal
1172	Pachyonychia congenita, Jadassohn-Lewandowsky type, 167200 (3)	KRT6A	148041	12q13	Dermatological	矮地茶	矮地茶	Ardisia japonica	cough-suppressing and panting-calming medicinal
1176	Palmoplantar keratoderma, nonepidermolytic, 600962 (3)	KRT16	148067	17q12-q21	Dermatological	百部	百部	Stemona tuberosa Lour.	cough-suppressing and panting-calming medicinal
1176	Palmoplantar verrucous nevus, unilateral, 144200 (3)	KRT16	148067	17q12-q21	Dermatological	葶苈子	葶藶子	Pepperweed Seed	cough-suppressing and panting-calming medicinal
1226	Piebaldism (3)	KIT, PBT	164920	4q12	Dermatological	半夏	半夏	Pinellia ternata	cough-suppressing and panting-calming medicinal
1227	Pigmentation of hair, skin, and eyes, variation in (3)	MATP, AIM1	606202	5p13.3	Dermatological	旋覆花	旋覆花	Inula britannica L.	cough-suppressing and panting-calming medicinal
1288	Psoriasis, susceptibility to, 177900 (3)	PSORS6	605364	19p13	Dermatological	菊科植物旋覆花	菊科植物旋覆花	Inula japonica	cough-suppressing and panting-calming medicinal
1288	Psoriatic arthritis, susceptibility to, 607507 (3)	CARD15, NOD2, IBD1, CD, ACUG, PSORAS1	605956	16q12	Dermatological	欧亚旋覆花	歐亞旋覆花	Inula Britannica	cough-suppressing and panting-calming medicinal
1295	Pyogenic sterile arthritis, pyoderma gangrenosum, and acne, 604416 (3)	PSTPIP1, PSTPIP, CD2BP1, PAPAS	606347	15q24-q25.1	Dermatological	天南星	天南星	Arisaema amurense	cough-suppressing and panting-calming medicinal
1306	Red hair/fair skin (3)	MC1R	155555	16q24.3	Dermatological	天南星	天南星	Arisaema consanguineum Schott	cough-suppressing and panting-calming medicinal
1314	Restrictive dermopathy, lethal, 275210 (3)	ZMPSTE24, FACE1, STE24, MADB	606480	1p34	Dermatological	白前	白前	Cynanchum stauntonii	cough-suppressing and panting-calming medicinal
1373	Self-healing collodion baby, 242300 (3)	TGM1, ICR2, LI1	190195	14q11.2	Dermatological	白前	白前	Willowleaf Swallowwort Rhizome	cough-suppressing and panting-calming medicinal
1401	Skin fragility-woolly hair syndrome, 607655 (3)	DSP, KPPS2, PPKS2	125647	6p24	Dermatological	芥子	芥子	Mustard Seed	cough-suppressing and panting-calming medicinal
1444	Steatocystoma multiplex, 184500 (3)	KRT17, PC2, PCHC1	148069	17q12-q21	Dermatological	白芥子	白芥子	Brassica juncea	cough-suppressing and panting-calming medicinal
1446	Stevens-Johnson syndrome, carbamazepine-induced, susceptibility to, 608579 (3)	HLA-B	142830	6p21.3	Dermatological	白芥子	白芥子	Sinapis alba L.	cough-suppressing and panting-calming medicinal
1510	Toenail dystrophy, isolated, 607523 (3)	COL7A1	120120	3p21.3	Dermatological	沙棘	沙棘	Hippophae rhamnoides	cough-suppressing and panting-calming medicinal
1518	Transient bullous of the newborn, 131705 (3)	COL7A1	120120	3p21.3	Dermatological	皂荚	皂莢	Gleditsia horrida	cough-suppressing and panting-calming medicinal
1525	Trichothiodystrophy (3)	ERCC3, XPB	133510	2q21	Dermatological	天南星	天南星	Jackinthepulpit Tuber	cough-suppressing and panting-calming medicinal
1525	Trichothiodystrophy, 601675 (3)	ERCC2, EM9	126340	19q13.2-q13.3	Dermatological	皂荚	皂莢	Gleditsia sinensis	cough-suppressing and panting-calming medicinal
1525	Trichothiodystrophy, complementation group A, 601675 (3)	TGF2H5, TTDA, TFB5, C6orf175	608780	6p25.3	Dermatological	禹白附	禹白附	Typhoniun giganteum Engl	cough-suppressing and panting-calming medicinal
1525	Trichothiodystrophy, nonphotosensitive 1, 234050 (3)	TTDN1, C7orf11, ABHS	609188	7p14	Dermatological	旋覆花	旋覆花	Inula Flower	cough-suppressing and panting-calming medicinal
1545	Unna-Thost disease, nonepidermolytic, 600962 (3)	KRT1	139350	12q13	Dermatological	银杏	銀杏	Ginkgo Biloba	cough-suppressing and panting-calming medicinal
1553	UV-induced skin damage, vulnerability to (3)	MC1R	155555	16q24.3	Dermatological	紫菀	紫菀	Aster tataricus	cough-suppressing and panting-calming medicinal
1608	Xeroderma pigmentosum, group A (3)	XPA	278700	9q22.3	Dermatological	苏子	蘇子	Perilla frutescens	cough-suppressing and panting-calming medicinal
1608	Xeroderma pigmentosum, group B (3)	ERCC3, XPB	133510	2q21	Dermatological	桑白皮	桑白皮	Morus alba	cough-suppressing and panting-calming medicinal
1608	Xeroderma pigmentosum, group C (3)	XPC, XPCC	278720	3p25	Dermatological	百部	百部	Stemona Root	cough-suppressing and panting-calming medicinal
1608	Xeroderma pigmentosum, group D, 278730 (3)	ERCC2, EM9	126340	19q13.2-q13.3	Dermatological	直立百部	直立百部	Stemona sessilifolia	cough-suppressing and panting-calming medicinal
1608	Xeroderma pigmentosum, group E, DDB-negative subtype, 278740 (3)	DDB2	600811	11p12-p11	Dermatological	蔓生百部	蔓生百部	Stemona japonica	cough-suppressing and panting-calming medicinal
1608	Xeroderma pigmentosum, group F, 278760 (3)	ERCC4, XPF	133520	16p13.3-p13.13	Dermatological	对叶百部	對葉百部	Stemona tuberosa	cough-suppressing and panting-calming medicinal
1608	Xeroderma pigmentosum, group G, 278780 (3)	ERCC5, XPG	133530	13q33	Dermatological	款冬花	款冬花	Tussilago farfara	cough-suppressing and panting-calming medicinal
1608	Xeroderma pigmentosum, variant type, 278750 (3)	POLH, XPV	603968	6p21.1-p12	Dermatological	葶苈子	葶藶子	Lepidium apetalum Willd.	cough-suppressing and panting-calming medicinal
113	Angelman syndrome, 105830 (3)	MECP2, RTT, PPMX, MRX16, MRX79	300005	Xq28	Developmental	人蔘	人蔘	Panax ginseng	qi-tonifying medicinal
113	Angelman syndrome, 105830 (3)	UBE3A, ANCR	601623	15q11-q13	Developmental	党蔘	黨蔘	Codonopsis pilosula	qi-tonifying medicinal
146	Arthrogryposis multiplex congenita, distal, type 1, 108120 (3)	TPM2, TMSB, AMCD1, DA1	190990	9p13.2-p13.1	Developmental	党蔘	黨蔘	Codonopsis pilosula	qi-tonifying medicinal
146	Arthrogryposis multiplex congenita, distal, type 2B, 601680 (3)	TNNI2, AMCD2B, DA2B, FSSV	191043	11p15.5	Developmental	川党蔘	川黨蔘	Codonopsis tangshen	qi-tonifying medicinal
146	Arthyrgryposis multiplex congenita, distal, type 2B, 601680 (3)	TNNT3, AMCD2B, DA2B, FSSV	600692	11p15.5	Developmental	大枣	大棗	Ziziphus jujuba Mill.	qi-tonifying medicinal
306	CHILD syndrome, 308050 (3)	NSDHL	300275	Xq28	Developmental	山药	山藥	Dioscorea batatas	qi-tonifying medicinal
336	Cleft lip/palate ectodermal dysplasia syndrome, 225000 (3)	HVEC, PVRL1, PVRR1, PRR1	600644	11q23-q24	Developmental	白术	白朮	Atractylodes macrocephala Koidz.	qi-tonifying medicinal
336	Cleft lip/palate, nonsyndromic, 608874 (3)	MSX1, HOX7, HYD1, OFC5	142983	4p16.1	Developmental	红景天	紅景天	Rhodiola rosea	qi-tonifying medicinal
336	Cleft palate with ankyloglossia, 303400 (3)	TBX22, CPX	300307	Xq12-q21	Developmental	竹节蔘	竹節蔘	Panax japonicus C. A. Mey.	qi-tonifying medicinal
364	Cornelia de Lange syndrome, 122470 (3)	NIPBL, CDLS	608667	5p13.1	Developmental	甘草	甘草	Glycyrrhiza uralensis	qi-tonifying medicinal
545	Focal cortical dysplasia, Taylor balloon cell type, 607341 (3)	TSC1, LAM	605284	9q34	Developmental	光果甘草	光果甘草	Clycyrrhiza glabra	qi-tonifying medicinal
2628	Growth retardation with deafness and mental retardation due to IGF1 deficiency,608747 (3)	IGF1	147440	12q22-q24.1	Developmental	胀果甘草	脹果甘草	Glycyrrhiza inflata	qi-tonifying medicinal
689	Holoprosencephaly-2, 157170 (3)	SIX3, HPE2	603714	2p21	Developmental	植物甘草	植物甘草	Glycyrrhiza uralensis	qi-tonifying medicinal
689	Holoprosencephaly-3, 142945 (3)	SHH, HPE3, HLP3, SMMCI	600725	7q36	Developmental	光果甘草	光果甘草	Glycyrrhiza glabra	qi-tonifying medicinal
689	Holoprosencephaly-4, 142946 (3)	TGIF, HPE4	602630	18p11.3	Developmental	植物甘草	植物甘草	Glycyrrhiza uralensis	qi-tonifying medicinal
689	Holoprosencephaly-5, 609637 (3)	ZIC2, HPE5	603073	13q32	Developmental	胀果甘草	脹果甘草	Glycyrrhiza inflata	qi-tonifying medicinal
689	Holoprosencephaly-7 (3)	PTCH, NBCCS, BCNS, HPE7	601309	9q22.3	Developmental	珠子蔘	珠子蔘	Panax bipinnatifidum Seem.	qi-tonifying medicinal
696	Holt-Oram syndrome, 142900 (3)	TBX5	601620	12q24.1	Developmental	西洋蔘	西洋蔘	Panax quinquefolium L.	qi-tonifying medicinal
819	Intrauterine and postnatal growth retardation (3)	IGF1R	147370	15q25-q26	Developmental	黄耆	黃耆	Astragalus membranaceus (Fisch.) Bge.	qi-tonifying medicinal
819	Intrauterine and postnatal growth retardation (3)	IGF2	147470	11p15.5	Developmental	膜荚黄耆	膜莢黃耆	Astragalus membranaceus	qi-tonifying medicinal
874	Left-right axis malformations (3)	ACVR2B	602730	3p22-p21.3	Developmental	蒙古黄耆	蒙古黃耆	Astragalus mongholicus	qi-tonifying medicinal
874	Left-right axis malformations (3)	EBAF, TGFB4, LEFTY2, LEFTA, LEFTYA	601877	1q42.1	Developmental	白扁豆	白扁豆	Dolichos lablab	qi-tonifying medicinal
881	Leprechaunism, 246200 (3)	INSR	147670	19p13.2	Developmental	太子蔘	太子蔘	Pseudostellaria heterophylla	qi-tonifying medicinal
911	Longevity, exceptional, 152430 (3)	CETP	118470	16q21	Developmental	山药	山藥	Dioscorea opposita	qi-tonifying medicinal
911	Longevity, reduced, 152430 (3)	AKAP10	604694	17p11.1	Developmental	甘草	甘草	Radix Glycyrrhizae	qi-tonifying medicinal
964	McKusick-Kaufman syndrome, 236700 (3)	MKKS, HMCS, KMS, MKS, BBS6	604896	20p12	Developmental	黄耆	黃耆	Astragalus root	qi-tonifying medicinal
982	Melorheostosis with osteopoikilosis, 155950 (3)	LEMD3, MAN1	607844	12q14	Developmental	蜂蜜	蜂蜜	Apis cerana Fabricius	qi-tonifying medicinal
1028	Mowat-Wilson syndrome, 235730 (3)	ZFHX1B, SMADIP1, SIP1	605802	2q22	Developmental	人蔘	人蔘	Panax ginseng	qi-tonifying medicinal
1090	Neural tube defects, maternal risk of, 601634 (3)	MTHFD, MTHFC	172460	14q24	Developmental	党蔘	黨蔘	Codonopsis pilosula	qi-tonifying medicinal
1116	Noonan syndrome 1, 163950 (3)	PTPN11, PTP2C, SHP2, NS1	176876	12q24.1	Developmental	党蔘	黨蔘	Codonopsis pilosula	qi-tonifying medicinal
1212	Persistent Mullerian duct syndrome, type I, 261550 (3)	AMH, MIF	600957	19p13.3-p13.2	Developmental	川党蔘	川黨蔘	Codonopsis tangshen	qi-tonifying medicinal
1212	Persistent Mullerian duct syndrome, type II, 261550 (3)	AMHR2, AMHR	600956	12q13	Developmental	大枣	大棗	Ziziphus jujuba Mill.	qi-tonifying medicinal
1213	Peters anomaly, 603807 (3)	PAX6, AN2, MGDA	607108	11p13	Developmental	山药	山藥	Dioscorea batatas	qi-tonifying medicinal
1213	Peters anomaly, 604229 (3)	CYP1B1, GLC3A	601771	2p22-p21	Developmental	白术	白朮	Atractylodes macrocephala Koidz.	qi-tonifying medicinal
1256	Precocious puberty, male, 176410 (3)	LHCGR	152790	2p21	Developmental	红景天	紅景天	Rhodiola rosea	qi-tonifying medicinal
1279	Pseudohermaphroditism, male, with gynecomastia, 264300 (3)	HSD17B3, EDH17B3	605573	9q22	Developmental	竹节蔘	竹節蔘	Panax japonicus C. A. Mey.	qi-tonifying medicinal
1279	Pseudohermaphroditism, male, with Leydig cell hypoplasia (3)	LHCGR	152790	2p21	Developmental	甘草	甘草	Glycyrrhiza uralensis	qi-tonifying medicinal
1294	Pyloric stenosis, infantile hypertrophic, susceptibility to, 179010 (3)	NOS1	163731	12q24.2-q24.31	Developmental	光果甘草	光果甘草	Clycyrrhiza glabra	qi-tonifying medicinal
1334	Roberts syndrome, 268300 (3)	ESCO2	609353	8p21.1	Developmental	胀果甘草	脹果甘草	Glycyrrhiza inflata	qi-tonifying medicinal
1337	Rokitansky-Kuster-Hauser syndrome, 277000 (3)	WNT4	603490	1p35	Developmental	植物甘草	植物甘草	Glycyrrhiza uralensis	qi-tonifying medicinal
1344	Saethre-Chotzen syndrome with eyelid anomalies, 101400 (3)	TWIST, ACS3, SCS	601622	7p21	Developmental	光果甘草	光果甘草	Glycyrrhiza glabra	qi-tonifying medicinal
1344	Saethre-Chotzen syndrome, 101400 (3)	FGFR2, BEK, CFD1, JWS	176943	10q26	Developmental	植物甘草	植物甘草	Glycyrrhiza uralensis	qi-tonifying medicinal
1344	Saethre-Chotzen syndrome, 101400 (3)	TWIST, ACS3, SCS	601622	7p21	Developmental	胀果甘草	脹果甘草	Glycyrrhiza inflata	qi-tonifying medicinal
1369	Seckel syndrome 1, 210600 (3)	ATR, FRP1, SCKL	601215	3q22-q24	Developmental	珠子蔘	珠子蔘	Panax bipinnatifidum Seem.	qi-tonifying medicinal
1399	Situs ambiguus (3)	NODAL	601265	Chr.10	Developmental	西洋蔘	西洋蔘	Panax quinquefolium L.	qi-tonifying medicinal
1399	Situs inversus viscerum, 270100 (3)	DNAH11, DNAHC11	603339	Chr.7	Developmental	黄耆	黃耆	Astragalus membranaceus (Fisch.) Bge.	qi-tonifying medicinal
1417	Sotos syndrome, 117550 (3)	NSD1, ARA267, STO	606681	5q35	Developmental	膜荚黄耆	膜莢黃耆	Astragalus membranaceus	qi-tonifying medicinal
1425	Spina bifida, 601634 (3)	MTHFD, MTHFC	172460	14q24	Developmental	蒙古黄耆	蒙古黃耆	Astragalus mongholicus	qi-tonifying medicinal
1425	Spina bifida, risk of, 601634, 182940 (3)	MTR	156570	1q43	Developmental	白扁豆	白扁豆	Dolichos lablab	qi-tonifying medicinal
1425	Spina bifida, risk of, 601634, 182940 (3)	MTRR	602568	5p15.3-p15.2	Developmental	太子蔘	太子蔘	Pseudostellaria heterophylla	qi-tonifying medicinal
1519	Transposition of great arteries, dextro-looped, 217095 (3)	CFC1, CRYPTIC, HTX2	605194	2q21.1	Developmental	山药	山藥	Dioscorea opposita	qi-tonifying medicinal
1519	Transposition of the great arteries, dextro-looped, 608808 (3)	THRAP2, PROSIT240, TRAP240L, KIAA1025	608771	12q24	Developmental	甘草	甘草	Radix Glycyrrhizae	qi-tonifying medicinal
1520	Treacher Collins mandibulofacial dysostosis, 154500 (3)	TCOF1, MFD1	606847	5q32-q33.1	Developmental	黄耆	黃耆	Astragalus root	qi-tonifying medicinal
1524	Trichorhinophalangeal syndrome, type I, 190350 (3)	TRPS1	604386	8q24.12	Developmental	蜂蜜	蜂蜜	Apis cerana Fabricius	qi-tonifying medicinal
1524	Trichorhinophalangeal syndrome, type III, 190351 (3)	TRPS1	604386	8q24.12	Developmental	人蔘	人蔘	Panax ginseng	qi-tonifying medicinal
3554	van der Woude syndrome, 119300 (3)	IRF6, VWS, LPS, PIT, PPS, OFC6	607199	1q32-q41	Developmental	党蔘	黨蔘	Codonopsis pilosula	qi-tonifying medicinal
1563	Virilization, maternal and fetal, from placental aromatase deficiency (3)	CYP19A1, CYP19, ARO	107910	15q21.1	Developmental	党蔘	黨蔘	Codonopsis pilosula	qi-tonifying medicinal
1582	Weaver syndrome, 277590 (3)	NSD1, ARA267, STO	606681	5q35	Developmental	川党蔘	川黨蔘	Codonopsis tangshen	qi-tonifying medicinal
1599	Witkop syndrome, 189500 (3)	MSX1, HOX7, HYD1, OFC5	142983	4p16.1	Developmental	大枣	大棗	Ziziphus jujuba Mill.	qi-tonifying medicinal
406	Deafness, autosomal dominant 1, 124900 (3)	DIAPH1, DFNA1, LFHL1	602121	5q31	Ear,Nose,Throat	半夏	半夏	Pinellia ternata	cough-suppressing and panting-calming medicinal
406	Deafness, autosomal dominant 10, 601316 (3)	EYA4, DFNA10, CMD1J	603550	6q23	Ear,Nose,Throat	旋覆花	旋覆花	Inula britannica L.	cough-suppressing and panting-calming medicinal
406	Deafness, autosomal dominant 11, neurosensory, 601317 (3)	MYO7A, USH1B, DFNB2, DFNA11	276903	11q13.5	Ear,Nose,Throat	菊科植物旋覆花	菊科植物旋覆花	Inula japonica	cough-suppressing and panting-calming medicinal
406	Deafness, autosomal dominant 12, 601842 (3)	TECTA, DFNA8, DFNA12, DFNB21	602574	11q22-q24	Ear,Nose,Throat	欧亚旋覆花	歐亞旋覆花	Inula Britannica	cough-suppressing and panting-calming medicinal
406	Deafness, autosomal dominant 13, 601868 (3)	COL11A2, STL3, DFNA13	120290	6p21.3	Ear,Nose,Throat	天南星	天南星	Arisaema amurense	cough-suppressing and panting-calming medicinal
406	Deafness, autosomal dominant 15, 602459 (3)	POU4F3, BRN3C	602460	5q31	Ear,Nose,Throat	天南星	天南星	Arisaema consanguineum Schott	cough-suppressing and panting-calming medicinal
406	Deafness, autosomal dominant 17, 603622 (3)	MYH9, MHA, FTNS, DFNA17	160775	22q11.2	Ear,Nose,Throat	白前	白前	Cynanchum stauntonii	cough-suppressing and panting-calming medicinal
406	Deafness, autosomal dominant 2, 600101 (3)	GJB3, CX31, DFNA2	603324	1p35.1	Ear,Nose,Throat	白前	白前	Willowleaf Swallowwort Rhizome	cough-suppressing and panting-calming medicinal
406	Deafness, autosomal dominant 2, 600101 (3)	KCNQ4, DFNA2	603537	1p34	Ear,Nose,Throat	芥子	芥子	Mustard Seed	cough-suppressing and panting-calming medicinal
406	Deafness, autosomal dominant 20/26, 604717 (3)	ACTG1, DFNA20, DFNA26	102560	17q25.3	Ear,Nose,Throat	白芥子	白芥子	Brassica juncea	cough-suppressing and panting-calming medicinal
406	Deafness, autosomal dominant 22, 606346 (3)	MYO6, DFNA22, DFNB37	600970	6q13	Ear,Nose,Throat	白芥子	白芥子	Sinapis alba L.	cough-suppressing and panting-calming medicinal
406	Deafness, autosomal dominant 28, 608641 (3)	TFCP2L3, DFNA28	608576	8q22	Ear,Nose,Throat	沙棘	沙棘	Hippophae rhamnoides	cough-suppressing and panting-calming medicinal
406	Deafness, autosomal dominant 3, 601544 (3)	GJB2, CX26, DFNB1, PPK, DFNA3, KID, HID	121011	13q11-q12	Ear,Nose,Throat	皂荚	皂莢	Gleditsia horrida	cough-suppressing and panting-calming medicinal
406	Deafness, autosomal dominant 3, 601544 (3)	GJB6, CX30, DFNA3, HED, ED2	604418	13q12	Ear,Nose,Throat	天南星	天南星	Jackinthepulpit Tuber	cough-suppressing and panting-calming medicinal
406	Deafness, autosomal dominant 36, 606705 (3)	TMC1, DFNB7, DFNB11, DFNA36	606706	9q13-q21	Ear,Nose,Throat	皂荚	皂莢	Gleditsia sinensis	cough-suppressing and panting-calming medicinal
406	Deafness, autosomal dominant 36, with dentinogenesis, 605594 (3)	DSPP, DPP, DGI1, DFNA39, DTDP2	125485	4q21.3	Ear,Nose,Throat	禹白附	禹白附	Typhoniun giganteum Engl	cough-suppressing and panting-calming medicinal
406	Deafness, autosomal dominant 4, 600652 (3)	MYH14, KIAA2034, DFNA4	608568	19q13.33	Ear,Nose,Throat	旋覆花	旋覆花	Inula Flower	cough-suppressing and panting-calming medicinal
406	Deafness, autosomal dominant 40 (3)	CRYM, DFNA40	123740	16p13.11-p12.3	Ear,Nose,Throat	银杏	銀杏	Ginkgo Biloba	cough-suppressing and panting-calming medicinal
406	Deafness, autosomal dominant 5 (3)	DFNA5	600994	7p15	Ear,Nose,Throat	紫菀	紫菀	Aster tataricus	cough-suppressing and panting-calming medicinal
406	Deafness, autosomal dominant 8, 601543 (3)	TECTA, DFNA8, DFNA12, DFNB21	602574	11q22-q24	Ear,Nose,Throat	苏子	蘇子	Perilla frutescens	cough-suppressing and panting-calming medicinal
406	Deafness, autosomal dominant 9, 601369 (3)	COCH, DFNA9	603196	14q12-q13	Ear,Nose,Throat	桑白皮	桑白皮	Morus alba	cough-suppressing and panting-calming medicinal
406	Deafness, autosomal dominant nonsyndromic sensorineural, 607841 (3)	MYO1A	601478	12q13-q15	Ear,Nose,Throat	百部	百部	Stemona Root	cough-suppressing and panting-calming medicinal
406	Deafness, autosomal dominant, with peripheral neuropathy (3)	GJB3, CX31, DFNA2	603324	1p35.1	Ear,Nose,Throat	直立百部	直立百部	Stemona sessilifolia	cough-suppressing and panting-calming medicinal
406	Deafness, autosomal recessive (3)	GJB3, CX31, DFNA2	603324	1p35.1	Ear,Nose,Throat	蔓生百部	蔓生百部	Stemona japonica	cough-suppressing and panting-calming medicinal
406	Deafness, autosomal recessive 1, 220290 (3)	GJB2, CX26, DFNB1, PPK, DFNA3, KID, HID	121011	13q11-q12	Ear,Nose,Throat	对叶百部	對葉百部	Stemona tuberosa	cough-suppressing and panting-calming medicinal
406	Deafness, autosomal recessive 10, congenital, 605316 (3)	TMPRSS3, ECHOS1, DFNB8, DFNB10	605511	21q22.3	Ear,Nose,Throat	款冬花	款冬花	Tussilago farfara	cough-suppressing and panting-calming medicinal
406	Deafness, autosomal recessive 12, 601386 (3)	CDH23, USH1D	605516	10q21-q22	Ear,Nose,Throat	葶苈子	葶藶子	Lepidium apetalum Willd.	cough-suppressing and panting-calming medicinal
406	Deafness, autosomal recessive 12, modifier of, 601386 (3)	ATP2B2, PMCA2	108733	3p26-p25	Ear,Nose,Throat	南葶苈子	南葶藶子	Descurainia sophia	cough-suppressing and panting-calming medicinal
406	Deafness, autosomal recessive 16, 603720 (3)	STRC, DFNB16	606440	15q15	Ear,Nose,Throat	枇杷叶	枇杷葉	Eriobotrya japonica	cough-suppressing and panting-calming medicinal
406	Deafness, autosomal recessive 18, 602092 (3)	USH1C, DFNB18	605242	11p15.1	Ear,Nose,Throat	矮地茶	矮地茶	Ardisia japonica	cough-suppressing and panting-calming medicinal
406	Deafness, autosomal recessive 2, neurosensory, 600060 (3)	MYO7A, USH1B, DFNB2, DFNA11	276903	11q13.5	Ear,Nose,Throat	百部	百部	Stemona tuberosa Lour.	cough-suppressing and panting-calming medicinal
406	Deafness, autosomal recessive 21, 603629 (3)	TECTA, DFNA8, DFNA12, DFNB21	602574	11q22-q24	Ear,Nose,Throat	葶苈子	葶藶子	Pepperweed Seed	cough-suppressing and panting-calming medicinal
406	Deafness, autosomal recessive 22, 607039 (3)	OTOA, DFNB22	607038	16p12.2	Ear,Nose,Throat	半夏	半夏	Pinellia ternata	cough-suppressing and panting-calming medicinal
406	Deafness, autosomal recessive 23, 609533 (3)	PCDH15, DFNB23	605514	10q21-q22	Ear,Nose,Throat	旋覆花	旋覆花	Inula britannica L.	cough-suppressing and panting-calming medicinal
406	Deafness, autosomal recessive 29 (3)	CLDN14, DFNB29	605608	21q22.3	Ear,Nose,Throat	菊科植物旋覆花	菊科植物旋覆花	Inula japonica	cough-suppressing and panting-calming medicinal
406	Deafness, autosomal recessive 3, 600316 (3)	MYO15A, DFNB3	602666	17p11.2	Ear,Nose,Throat	欧亚旋覆花	歐亞旋覆花	Inula Britannica	cough-suppressing and panting-calming medicinal
406	Deafness, autosomal recessive 30, 607101 (3)	MYO3A, DFNB30	606808	10p11.1	Ear,Nose,Throat	天南星	天南星	Arisaema amurense	cough-suppressing and panting-calming medicinal
406	Deafness, autosomal recessive 31, 607084 (3)	WHRN, CIP98, KIAA1526, DFNB31	607928	9q32-q34	Ear,Nose,Throat	天南星	天南星	Arisaema consanguineum Schott	cough-suppressing and panting-calming medicinal
406	Deafness, autosomal recessive 36, 609006 (3)	ESPN	606351	1p36.3-p36.1	Ear,Nose,Throat	白前	白前	Cynanchum stauntonii	cough-suppressing and panting-calming medicinal
406	Deafness, autosomal recessive 37, 607821 (3)	MYO6, DFNA22, DFNB37	600970	6q13	Ear,Nose,Throat	白前	白前	Willowleaf Swallowwort Rhizome	cough-suppressing and panting-calming medicinal
406	Deafness, autosomal recessive 4, 600791 (3)	SLC26A4, PDS, DFNB4	605646	7q31	Ear,Nose,Throat	芥子	芥子	Mustard Seed	cough-suppressing and panting-calming medicinal
406	Deafness, autosomal recessive 6, 600971 (3)	TMIE, DFNB6	607237	3p21	Ear,Nose,Throat	白芥子	白芥子	Brassica juncea	cough-suppressing and panting-calming medicinal
406	Deafness, autosomal recessive 61 (3)	PRES, DFNB61, SLC26A5	604943	7q22.1	Ear,Nose,Throat	白芥子	白芥子	Sinapis alba L.	cough-suppressing and panting-calming medicinal
406	Deafness, autosomal recessive 7, 600974 (3)	TMC1, DFNB7, DFNB11, DFNA36	606706	9q13-q21	Ear,Nose,Throat	沙棘	沙棘	Hippophae rhamnoides	cough-suppressing and panting-calming medicinal
406	Deafness, autosomal recessive 8, childhood onset, 601072 (3)	TMPRSS3, ECHOS1, DFNB8, DFNB10	605511	21q22.3	Ear,Nose,Throat	皂荚	皂莢	Gleditsia horrida	cough-suppressing and panting-calming medicinal
406	Deafness, autosomal recessive 9, 601071 (3)	OTOF, DFNB9, NSRD9	603681	2p23-p22	Ear,Nose,Throat	天南星	天南星	Jackinthepulpit Tuber	cough-suppressing and panting-calming medicinal
406	Deafness, congenital heart defects, and posterior embryotoxon (3)	JAG1, AGS, AHD	601920	20p12	Ear,Nose,Throat	皂荚	皂莢	Gleditsia sinensis	cough-suppressing and panting-calming medicinal
406	Deafness, nonsyndromic (3) ()	KIAA1199	608366	15q24	Ear,Nose,Throat	禹白附	禹白附	Typhoniun giganteum Engl	cough-suppressing and panting-calming medicinal
406	Deafness, nonsyndromic neurosensory, digenic (3)	GJB6, CX30, DFNA3, HED, ED2	604418	13q12	Ear,Nose,Throat	旋覆花	旋覆花	Inula Flower	cough-suppressing and panting-calming medicinal
406	Deafness, sensorineural, with hypertrophic cardiomyopathy, 606346 (3)	MYO6, DFNA22, DFNB37	600970	6q13	Ear,Nose,Throat	银杏	銀杏	Ginkgo Biloba	cough-suppressing and panting-calming medicinal
406	Deafness, X-linked 1, progressive (3)	TIMM8A, DFN1, DDP, MTS, DDP1	300356	Xq22	Ear,Nose,Throat	紫菀	紫菀	Aster tataricus	cough-suppressing and panting-calming medicinal
406	Deafness, X-linked 3, conductive, with stapes fixation, 304400 (3)	POU3F4, DFN3	300039	Xq21.1	Ear,Nose,Throat	苏子	蘇子	Perilla frutescens	cough-suppressing and panting-calming medicinal
484	Enlarged vestibular aqueduct, 603545 (3)	SLC26A4, PDS, DFNB4	605646	7q31	Ear,Nose,Throat	桑白皮	桑白皮	Morus alba	cough-suppressing and panting-calming medicinal
646	Hearing loss, low-frequency sensorineural, 600965 (3)	WFS1, WFRS, WFS, DFNA6	606201	4p16.1	Ear,Nose,Throat	百部	百部	Stemona Root	cough-suppressing and panting-calming medicinal
1204	Pendred syndrome, 274600 (3)	SLC26A4, PDS, DFNB4	605646	7q31	Ear,Nose,Throat	直立百部	直立百部	Stemona sessilifolia	cough-suppressing and panting-calming medicinal
1207	Periodontitis, juvenile, 170650 (3)	CTSC, CPPI, PALS, PLS, HMS	602365	11q14.1-q14.3	Ear,Nose,Throat	蔓生百部	蔓生百部	Stemona japonica	cough-suppressing and panting-calming medicinal
1217	Phenylthiocarbamide tasting, 171200 (3)	TAS2R38, T2R61, PTC	607751	7q35-q36	Ear,Nose,Throat	对叶百部	對葉百部	Stemona tuberosa	cough-suppressing and panting-calming medicinal
1	17,20-lyase deficiency, isolated, 202110 (3)	CYP17A1, CYP17, P450C17	609300	10q24.3	Endocrine	防风	防風	Saposhnikovia divaricata	wind-cold-dispersing
1	17-alpha-hydroxylase/17,20-lyase deficiency, 202110 (3)	CYP17A1, CYP17, P450C17	609300	10q24.3	Endocrine	苍耳子	蒼耳子	Xanthium sibiricum	wind-cold-dispersing
30	Acid-labile subunit, deficiency of (3)	IGFALS, ALS	601489	16p13.3	Endocrine	辛夷	辛夷	Flos Magnoliae	wind-cold-dispersing
38	Acromegaly, 102200 (3)	GNAS, GNAS1, GPSA, POH, PHP1B, PHP1A, AHO	139320	20q13.2	Endocrine	玉兰	玉蘭	Magnolia denudata	wind-cold-dispersing
38	Acromegaly, 102200 (3)	SSTR5	182455	16p13.3	Endocrine	麻黄	麻黃	Ephedra equisetina	wind-cold-dispersing
52	Adiponectin deficiency (3)	APM1, GBP28	605441	3q27	Endocrine	麻黄	麻黃	Ephedra sinica	wind-cold-dispersing
53	Adrenal hyperplasia, congenital, due to 11-beta-hydroxylase deficiency (3)	CYP11B1, P450C11, FHI	202010	8q21	Endocrine	麻黄	麻黃	Herba Ephedrae	wind-cold-dispersing
53	Adrenal hyperplasia, congenital, due to 21-hydroxylase deficiency (3)	CYP21A2, CYP21, CA21H	201910	6p21.3	Endocrine	羌活	羌活	Notopterygium incisum Ting ex H.T. Chang	wind-cold-dispersing
53	Adrenal hypoplasia, congenital, with hypogonadotropic hypogonadism, 300200 (3)	DAX1, AHC, AHX, NROB1	300473	Xp21.3-p21.2	Endocrine	草本植物羌活	草本植物羌活	Notopterygium incisum	wind-cold-dispersing
2055	Adrenocortical insufficiency without ovarian defect (3)	FTZF1, FTZ1, SF1	184757	9q33	Endocrine	宽叶羌活	寬葉羌活	Notopterygium forbesii	wind-cold-dispersing
55	Adrenocorticotropic hormone deficiency, 201400 (3)	TBS19	604614	1q23-q24	Endocrine	香薷	香薷	Mosla chinensis	wind-cold-dispersing
77	Aldosterone to renin ratio raised (3)	CYP11B2	124080	8q21	Endocrine	紫苏	紫蘇	Perilla frutescens	wind-cold-dispersing
78	Aldosteronism, glucocorticoid-remediable, 103900 (3)	CYP11B1, P450C11, FHI	202010	8q21	Endocrine	白芷	白芷	Angelica dahurica	wind-cold-dispersing
109	Androgen insensitivity, 300068 (3)	AR, DHTR, TFM, SBMA, KD, SMAX1	313700	Xq11-q12	Endocrine	藁本	藁本	Ligusticum sinense Oliv. Or Ligusticum jeholense Nakai et Kitag	wind-cold-dispersing
115	Angiofibroma, sporadic (3)	MEN1	131100	11q13	Endocrine	生姜	生薑	Zingiber officinale	wind-cold-dispersing
117	Angiotensin I-converting enzyme, benign serum increase (3)	ACE, DCP1, ACE1	106180	17q23	Endocrine	荊芥	荊芥	Schizonepeta tenuifolia	wind-cold-dispersing
2174	Autoimmune thyroid disease, susceptibility to 3, 608175 (3)	TG, AITD3	188450	8q24.2-q24.3	Endocrine	葱白	蔥白	Allium fistulosum	wind-cold-dispersing
178	Azoospermia (3)	USP9Y, DFFRY	400005	Yq11.2	Endocrine	细辛	細辛	Asarum sieboldii Miq.	wind-cold-dispersing
178	Azoospermia due to perturbations of meiosis, 270960 (3)	SYCP3, SCP3, COR1	604759	12q23	Endocrine	北细辛	北細辛	Asarum heterotropoides	wind-cold-dispersing
180	Bamforth-Lazarus syndrome, 241850 (3)	FOXE1, FKHL15, TITF2, TTF2	602617	9q22	Endocrine	汉城细辛	漢城細辛	Asarum sieboldii	wind-cold-dispersing
367	Cortisol resistance (3)	NR3C1, GCR, GRL	138040	5q31	Endocrine	桂枝	桂枝	Cinnamomum cassia	wind-cold-dispersing
2427	Diabetes insipidus, nephrogenic, 304800 (3)	AVPR2, DIR, DI1, ADHR	300538	Xq28	Endocrine	胡荽	胡荽	Coriandrum sativum L.	wind-cold-dispersing
2427	Diabetes insipidus, nephrogenic, autosomal dominant, 125800 (3)	AQP2	107777	12q13	Endocrine	辛夷	辛夷	Magnolia liliflora Desr.	wind-cold-dispersing
2427	Diabetes insipidus, nephrogenic, autosomal recessive, 222000 (3)	AQP2	107777	12q13	Endocrine	防风	防風	Saposhnikovia divaricate	wind-cold-dispersing
2427	Diabetes insipidus, neurohypophyseal, 125700 (3)	AVP, AVRP, VP	192340	20p13	Endocrine	羌活	羌活	Rhizoma et Radix Notopterygii	wind-cold-dispersing
427	Diabetes mellitus, 125853 (3)	ABCC8, SUR, PHHI, SUR1	600509	11p15.1	Endocrine	荊芥	荊芥	Schizonepeta tenuifolia (Benth.) Briq.	wind-cold-dispersing
427	Diabetes mellitus, insulin-dependent, 222100 (3)	TCF1, HNF1A, MODY3	142410	12q24.2	Endocrine	细辛	細辛	Wild ginger (xi xin)	wind-cold-dispersing
427	Diabetes mellitus, insulin-dependent, 5, 600320 (3)	SUMO4, IDDM5	608829	6q25	Endocrine	柽柳	檉柳	Tamarix chinensis Lour.	wind-cold-dispersing
427	Diabetes mellitus, insulin-dependent, susceptibility to, 222100 (3)	PTPN8, PEP, PTPN22, LYP	600716	1p13	Endocrine	菊花	菊花	Chrysanthemum morifolium Ramat	wind-heat dispersing
427	Diabetes mellitus, insulin-resistant, with acanthosis nigricans (3)	INSR	147670	19p13.2	Endocrine	升麻	升麻	Cimicifuga dahurica	wind-heat dispersing
427	Diabetes mellitus, insulin-resistant, with acanthosis nigricans and hypertension, 604367 (3)	PPARG, PPARG1, PPARG2	601487	3p25	Endocrine	升麻	升麻	Cimicifuga foetida	wind-heat dispersing
427	Diabetes mellitus, neonatal-onset, 606176 (3)	GCK	138079	7p15-p13	Endocrine	升麻	升麻	Rhizoma Cimicifugae	wind-heat dispersing
427	Diabetes mellitus, noninsulin-dependent (3)	IRS1	147545	2q36	Endocrine	浮萍	浮萍	Spirodela polyrrhiza	wind-heat dispersing
427	Diabetes mellitus, noninsulin-dependent (3)	SLC2A2, GLUT2	138160	3q26.1-q26.3	Endocrine	薄荷	薄荷	Mentha haplocalyx Briq	wind-heat dispersing
427	Diabetes mellitus, noninsulin-dependent (3)	SLC2A4, GLUT4	138190	17p13	Endocrine	牛蒡子	牛蒡子	Arctium lappa	wind-heat dispersing
427	Diabetes mellitus, noninsulin-dependent, 125853 (3)	GCGR	138033	17q25	Endocrine	木贼	木賊	Equisetum hiemale	wind-heat dispersing
427	Diabetes mellitus, noninsulin-dependent, 125853 (3)	GPD2	138430	2q24.1	Endocrine	柴胡	柴胡	Bupleurum chinense	wind-heat dispersing
427	Diabetes mellitus, noninsulin-dependent, 125853 (3)	HNF4A, TCF14, MODY1	600281	20q12-q13.1	Endocrine	柴胡	柴胡	Bupleurum scorzonerifolium	wind-heat dispersing
427	Diabetes mellitus, noninsulin-dependent, 125853 (3)	IRS2	600797	13q34	Endocrine	柴胡	柴胡	Radix Bupleuri	wind-heat dispersing
427	Diabetes mellitus, noninsulin-dependent, 125853 (3)	MAPK8IP1, IB1	604641	11p12-p11.2	Endocrine	蔓荊子	蔓荊子	Vitex trifolia	wind-heat dispersing
427	Diabetes mellitus, noninsulin-dependent, 125853 (3)	NEUROD1, NIDDM	601724	2q32	Endocrine	葛根	葛根	Pueraria lobata	wind-heat dispersing
427	Diabetes mellitus, noninsulin-dependent, 125853 (3)	TCF2, HNF2	189907	17cen-q21.3	Endocrine	葛根	葛根	Pueraria lobata (Willd.) Ohwi	wind-heat dispersing
427	Diabetes mellitus, noninsulin-dependent, 2, 125853 (3)	TCF1, HNF1A, MODY3	142410	12q24.2	Endocrine	葛根	葛根	Pueraria thomsonii	wind-heat dispersing
427	Diabetes mellitus, noninsulin-dependent, 601283 (3)	CAPN10	605286	2q37.3	Endocrine	蝉蛻	蟬蛻	Periostracum Cicadae	wind-heat dispersing
427	Diabetes mellitus, noninsulin-dependent, susceptibility to, 125853 (3)	RETN, RSTN, FIZZ3	605565	19p13.2	Endocrine	桑叶	桑葉	Morus alba	wind-heat dispersing
427	Diabetes mellitus, non-insulin-dependent, susceptibility to, 125853 (3)	ENPP1, PDNP1, NPPS, M6S1, PCA1	173335	6q22-q23	Endocrine	淡豆豉	淡豆豉	Semen Sojae Praepatum	wind-heat dispersing
427	Diabetes mellitus, permanent neonatal, with cerebellar agenesis, 609069 (3)	PTF1A	607194	10p12.3	Endocrine	牛蒡子	牛蒡子	Arctium lappa L.	wind-heat dispersing
427	Diabetes mellitus, permanent neonatal, with neurologic features, 606176 (3)	KCNJ11, BIR, PHHI	600937	11p15.1	Endocrine	菊花	菊花	Chrysanthemum morifolium Ramat.	wind-heat dispersing
427	Diabetes mellitus, type I, susceptibility to, 222100 (3)	FOXP3, IPEX, AIID, XPID, PIDX	300292	Xp11.23-q13.3	Endocrine	葛根	葛根	Radix Puerariae	wind-heat dispersing
427	Diabetes mellitus, type II, 125853 (3)	AKT2	164731	19q13.1-q13.2	Endocrine	薄荷	薄荷	Mentha haplocalyx Briq.	wind-heat dispersing
427	Diabetes mellitus, type II, susceptibility to, 125853 (3)	IPF1	600733	13q12.1	Endocrine	益母草	益母草	Leonurus heterophyllus Sweet	blood-activating menstruationregulating medicinal
427	Diabetes, permanent neonatal, 606176 (3)	KCNJ11, BIR, PHHI	600937	11p15.1	Endocrine	桃仁	桃仁	Peach Seed	blood-activating menstruationregulating medicinal
427	Diabetic nephropathy, susceptibility to, 603933 (3)	ACE, DCP1, ACE1	106180	17q23	Endocrine	植物桃	植物桃	Prunus persica	blood-activating menstruationregulating medicinal
427	Diabetic retinopathy, NIDDM-related, susceptibility to, 125853 (3)	VEGF	192240	6p12	Endocrine	山桃	山桃	Prunus davidiana	blood-activating menstruationregulating medicinal
443	Dosage-sensitive sex reversal, 300018 (3)	DAX1, AHC, AHX, NROB1	300473	Xp21.3-p21.2	Endocrine	红花	紅花	Carthamus tinctorius	blood-activating menstruationregulating medicinal
509	Estrogen resistance (3)	ESR1, ESR	133430	6q25.1	Endocrine	鸡血藤	雞血藤	Spatholobus suberectus	blood-activating menstruationregulating medicinal
532	Fertile eunuch syndrome, 228300 (3)	GNRHR, LHRHR	138850	4q21.2	Endocrine	丹蔘(鼠尾草)	丹蔘(鼠尾草)	Salvia miltiorrhiza	blood-activating menstruationregulating medicinal
546	Follicle-stimulating hormone deficiency, isolated, 229070 (3)	FSHB	136530	11p13	Endocrine	王不留行	王不留行	Vaccaria segetalis	blood-activating menstruationregulating medicinal
598	Glucocorticoid deficiency 2, 607398 (3)	MRAP, FALP, C21orf61	609196	21q22.1	Endocrine	牛膝	牛膝	Achyranthes bidentata	blood-activating menstruationregulating medicinal
598	Glucocorticoid deficiency, due to ACTH unresponsiveness, 202200 (3)	MC2R	607397	18p11.2	Endocrine	月季花	月季花	Rosa chinensis	blood-activating menstruationregulating medicinal
617	Goiter, congenital (3)	TPO, TPX	606765	2p25	Endocrine	泽兰	澤蘭	Lycopus lucidus	blood-activating menstruationregulating medicinal
617	Goiter, nonendemic, simple (3)	TG, AITD3	188450	8q24.2-q24.3	Endocrine	凌霄花	凌霄花	Trumpetcreeper Flower	blood-activating menstruationregulating medicinal
619	Gonadal dysgenesis, 46XY, partial, with minifascicular neuropathy, 607080 (3)	DHH	605423	12q13.1	Endocrine	紫葳科植物凌霄	紫葳科植物凌霄	Campsis grandiflora	blood-activating menstruationregulating medicinal
619	Gonadal dysgenesis, XY type (3)	SRY, TDF	480000	Yp11.3	Endocrine	牛膝	牛膝	Achyranthes bidentata	blood-activating menstruationregulating medicinal
624	Graves disease, susceptibility to, 275000 (3)	CTLA4	123890	2q33	Endocrine	益母草	益母草	Leonurus japonicus	blood-activating menstruationregulating medicinal
624	Graves disease, susceptibility to, 3, 275000 (3)	GC, DBP	139200	4q12	Endocrine	淫羊藿	淫羊藿	Epimedium brevicornum	yang-tonifying medicinal
628	Growth hormone deficient dwarfism (3)	GHRHR	139191	7p15-p14	Endocrine	淫羊藿	淫羊藿	Epimedium Herb	yang-tonifying medicinal
628	Growth hormone insensitivity with immunodeficiency, 245590 (3)	STAT5B	604260	17q11.2	Endocrine	箭叶淫羊藿	箭葉淫羊藿	Epimedium sagittatum	yang-tonifying medicinal
718	Hyperandrogenism, nonclassic type, due to 21-hydroxylase deficiency (3)	CYP21A2, CYP21, CA21H	201910	6p21.3	Endocrine	巫山淫羊藿	巫山淫羊藿	Epimedium	yang-tonifying medicinal
743	Hyperparathyroidism, AD, 145000 (3)	MEN1	131100	11q13	Endocrine	朝鲜淫羊藿	朝鮮淫羊藿	Epimedium	yang-tonifying medicinal
743	Hyperparathyroidism, familial primary, 145000 (3)	HRPT2, C1orf28	607393	1q25-q31	Endocrine	巴戟天	巴戟天	Morinda officinalis	yang-tonifying medicinal
743	Hyperparathyroidism, neonatal, 239200 (3)	CASR, HHC1, PCAR1, FIH	601199	3q13.3-q21	Endocrine	绞股蓝	絞股藍	Gynostemma pentaphyllum	yang-tonifying medicinal
743	Hyperparathyroidism-jaw tumor syndrome, 145001 (3)	HRPT2, C1orf28	607393	1q25-q31	Endocrine	杜仲	杜仲	Eucommia ulmoides	yang-tonifying medicinal
748	Hyperproinsulinemia, familial (3)	INS	176730	11p15.5	Endocrine	益智仁	益智仁	Alpinia oxyphylla	yang-tonifying medicinal
754	Hyperthroidism, congenital (3)	TSHR	603372	14q31	Endocrine	韮子	韮子	Allium tuberosum Rottl	yang-tonifying medicinal
755	Hyperthyroidism, congenital (3)	TPO, TPX	606765	2p25	Endocrine	菟丝子	菟絲子	Cuscuta chinensis	yang-tonifying medicinal
764	Hypocalcemia, autosomal dominant, 146200 (3)	CASR, HHC1, PCAR1, FIH	601199	3q13.3-q21	Endocrine	牛膝	牛膝	Achyranthes bidentata Bl.	yang-tonifying medicinal
764	Hypocalcemia, autosomal dominant, with Bartter syndrome (3)	CASR, HHC1, PCAR1, FIH	601199	3q13.3-q21	Endocrine	补骨脂	補骨脂	Psoralea corylifolia	yang-tonifying medicinal
765	Hypocalciuric hypercalcemia, type I, 145980 (3)	CASR, HHC1, PCAR1, FIH	601199	3q13.3-q21	Endocrine	冬虫夏草	冬蟲夏草	Cordyceps sinensis	yang-tonifying medicinal
773	Hypogonadism, hypergonadotropic (3)	LHB	152780	19q13.32	Endocrine	锁阳	鎖陽	Cynomorium songaricum	yang-tonifying medicinal
774	Hypogonadotropic hypogonadism (3)	GNRHR, LHRHR	138850	4q21.2	Endocrine	沙苑子	沙苑子	Astragalus complanatus	yang-tonifying medicinal
774	Hypogonadotropic hypogonadism (3)	LHCGR	152790	2p21	Endocrine	葫芦巴	葫蘆巴	Trigonella foenum-graecum	yang-tonifying medicinal
774	Hypogonadotropic hypogonadism, 146110 (3)	GPR54	604161	19p13.3	Endocrine	续断	續斷	Dipsacus asperoides	yang-tonifying medicinal
774	Hypogonadotropic hypogonadism, 146110 (3)	NELF	608137	9q34.3	Endocrine	肉苁蓉	肉蓯蓉	Cistanche deserticola	yang-tonifying medicinal
779	Hypoparathyroidism, autosomal dominant(3)	PTH	168450	11p15.3-p15.1	Endocrine	肉苁蓉	肉蓯蓉	Desertliving Cistanche	yang-tonifying medicinal
779	Hypoparathyroidism, autosomal recessive (3)	PTH	168450	11p15.3-p15.1	Endocrine	仙茅	仙茅	Curculigo orchioides	yang-tonifying medicinal
779	Hypoparathyroidism, familial isolated, 146200 (3)	GCMB	603716	6p24.2	Endocrine	核桃仁	核桃仁	Juglans regia	yang-tonifying medicinal
781	Hypoparathyroidism, sensorineural deafness, and renal dysplasia, 146255 (3)	GATA3, HDR	131320	10p15	Endocrine	益智仁	益智仁	Alpinia oxyphylla Miq	yang-tonifying medicinal
780	Hypoparathyroidism-retardation-dysmorphism syndrome, 241410 (3)	TBCE, KCS, KCS1, HRD	604934	1q42-q43	Endocrine	鹿茸	鹿茸	Cervus elaphus L.	yang-tonifying medicinal
787	Hypothyroidism, autoimmune, 140300 (3)	CTLA4	123890	2q33	Endocrine	鹿茸	鹿茸	Cervus nippon Temminck	yang-tonifying medicinal
787	Hypothyroidism, congenital, 274400 (3)	SLC5A5, NIS	601843	19p13.2-p12	Endocrine	紫河车	紫河車	Homo sapiens L.	yang-tonifying medicinal
787	Hypothyroidism, congenital, due to DUOX2 deficiency, 607200 (3)	DUOX2, THOX2	606759	15q15.3	Endocrine	续断	續斷	Dipsacus japonicus Miq.	yang-tonifying medicinal
787	Hypothyroidism, congenital, due to thyroid dysgenesis or hypoplasia, 218700 (3)	PAX8	167415	2q12-q14	Endocrine	三七	三七	Panax notoginseng	yang-tonifying medicinal
787	Hypothyroidism, congenital, due to TSH resistance, 275200 (3)	TSHR	603372	14q31	Endocrine	何首乌	何首烏	Polygonum multiflorum	yang-tonifying medicinal
787	Hypothyroidism, hereditary congenital (3)	TG, AITD3	188450	8q24.2-q24.3	Endocrine	龙眼肉	龍眼肉	Dimocarpus longan	yang-tonifying medicinal
787	Hypothyroidism, nongoitrous (3)	TSHB	188540	1p13	Endocrine	熟地黄	熟地黃	Rehmannia glutinosa	yang-tonifying medicinal
787	Hypothyroidism, subclinical (3)	TSHR	603372	14q31	Endocrine	当归	當歸	Angelica sinensis	yang-tonifying medicinal
809	Infundibular hypoplasia and hypopituitarism (3)	SOX3, MRGH	313430	Xq26.3	Endocrine	白芍	白芍	Paeonia lactiflora	yang-tonifying medicinal
825	Isolated growth hormone deficiency, Illig type with absent GH and Kowarski type with bioinactive GH (3)	GH1, GHN	139250	17q22-q24	Endocrine	三七	三七	Panax pseudo-ginseng Wall. var. notoginseng (Burk.) Hoo et Tseng	yang-tonifying medicinal
903	Lipoid adrenal hyperplasia, 201710 (3)	STAR	600617	8p11.2	Endocrine	玉竹	玉竹	Polygonatum odoratum	yin-tonifying medicinal
903	Lipoid congenital adrenal hyperplasia, 201710 (3)	CYP11A, P450SCC	118485	15q23-q24	Endocrine	枸杞	枸杞	Lycium barbarum	yin-tonifying medicinal
1020	MODY, one form, 125850 (3)	INS	176730	11p15.5	Endocrine	麦门冬	麥門冬	Ophiopogon japonicus	yin-tonifying medicinal
1020	MODY, type I, 125850 (3)	HNF4A, TCF14, MODY1	600281	20q12-q13.1	Endocrine	天门冬	天門冬	Asparagus cochinchinensis	yin-tonifying medicinal
1020	MODY, type II, 125851 (3)	GCK	138079	7p15-p13	Endocrine	墨汗莲	墨汗蓮	Eclipta prostrata	yin-tonifying medicinal
1020	MODY, type III, 600496 (3)	TCF1, HNF1A, MODY3	142410	12q24.2	Endocrine	石斛	石斛	Dendrobium nobile	yin-tonifying medicinal
1020	MODY, type IV (3)	IPF1	600733	13q12.1	Endocrine	百合	百合	Lily bulb	yin-tonifying medicinal
1020	MODY, type V, 604284 (3)	TCF2, HNF2	189907	17cen-q21.3	Endocrine	卷丹	卷丹	Lilium lancifolium	yin-tonifying medicinal
1020	MODY5 with nephron agenesis (3)	TCF2, HNF2	189907	17cen-q21.3	Endocrine	女贞子	女貞子	Ligustrum lucidum	yin-tonifying medicinal
1020	MODY5 with non-diabetic renal disease and Mullerian aplasia (3)	TCF2, HNF2	189907	17cen-q21.3	Endocrine	黄精	黃精	Polygonatum sibiricum Delar. ex Redoute	yin-tonifying medicinal
3171	Ovarian dysgenesis 1, 233300 (3)	FSHR, ODG1	136435	2p21-p16	Endocrine	滇黄精	滇黃精	Polygonatum kingianum	yin-tonifying medicinal
3171	Ovarian dysgenesis 2, 300510 (3)	BMP15, GDF9B, ODG2	300247	Xp11.2	Endocrine	桑椹	桑椹	Morus alba	yin-tonifying medicinal
5170	Ovarian hyperstimulation syndrome, gestational, 608115 (3)	FSHR, ODG1	136435	2p21-p16	Endocrine	北沙蔘	北沙蔘	Glehnia littoralis	yin-tonifying medicinal
1205	Perineal hypospadias (3)	AR, DHTR, TFM, SBMA, KD, SMAX1	313700	Xq11-q12	Endocrine	黑芝麻	黑芝麻	Sesamum indicum	yin-tonifying medicinal
5232	Pituitary hormone deficiency, combined (3)	POU1F1, PIT1	173110	3p11	Endocrine	黄精	黃精	Solomonseal Rhizome	yin-tonifying medicinal
5232	Pituitary hormone deficiency, combined (3)	PROP1	601538	5q	Endocrine	防风	防風	Saposhnikovia divaricata	wind-cold-dispersing
5232	Pituitary hormone deficiency, combined, HESX1-related, 182230 (3)	HESX1, RPX	601802	3p21.2-p21.1	Endocrine	苍耳子	蒼耳子	Xanthium sibiricum	wind-cold-dispersing
5232	Pituitary hormone deficiency, combined, with rigid cervical spine, 262600 (3)	LHX3	600577	9q34.3	Endocrine	辛夷	辛夷	Flos Magnoliae	wind-cold-dispersing
1267	Prolactinoma, hyperparathyroidism, carcinoid syndrome (3)	MEN1	131100	11q13	Endocrine	玉兰	玉蘭	Magnolia denudata	wind-cold-dispersing
1281	Pseudohypoaldosteronism type I, autosomal dominant, 177735 (3)	NR3C2, MLR, MCR	600983	4q31.1	Endocrine	麻黄	麻黃	Ephedra equisetina	wind-cold-dispersing
1281	Pseudohypoaldosteronism type II (3)	WNK4, PRKWNK4, PHA2B	601844	17q21-q22	Endocrine	麻黄	麻黃	Ephedra sinica	wind-cold-dispersing
1281	Pseudohypoaldosteronism, type I, 264350 (3)	SCNN1A	600228	12p13	Endocrine	麻黄	麻黃	Herba Ephedrae	wind-cold-dispersing
1281	Pseudohypoaldosteronism, type I, 264350 (3)	SCNN1B	600760	16p13-p12	Endocrine	羌活	羌活	Notopterygium incisum Ting ex H.T. Chang	wind-cold-dispersing
1281	Pseudohypoaldosteronism, type I, 264350 (3)	SCNN1G, PHA1	600761	16p13-p12	Endocrine	草本植物羌活	草本植物羌活	Notopterygium incisum	wind-cold-dispersing
1281	Pseudohypoaldosteronism, type IIC, 145260 (3)	WNK1, PRKWNK1, KDP, PHA2C	605232	12p13	Endocrine	宽叶羌活	寬葉羌活	Notopterygium forbesii	wind-cold-dispersing
1282	Pseudohypoparathyroidism, type Ia, 103580 (3)	GNAS, GNAS1, GPSA, POH, PHP1B, PHP1A, AHO	139320	20q13.2	Endocrine	香薷	香薷	Mosla chinensis	wind-cold-dispersing
1282	Pseudohypoparathyroidism, type Ib, 603233 (3)	GNAS, GNAS1, GPSA, POH, PHP1B, PHP1A, AHO	139320	20q13.2	Endocrine	紫苏	紫蘇	Perilla frutescens	wind-cold-dispersing
1415	Somatotrophinoma (3)	GNAS, GNAS1, GPSA, POH, PHP1B, PHP1A, AHO	139320	20q13.2	Endocrine	白芷	白芷	Angelica dahurica	wind-cold-dispersing
3503	Thyroid hormone organification defect IIA, 274500 (3)	TPO, TPX	606765	2p25	Endocrine	藁本	藁本	Ligusticum sinense Oliv. Or Ligusticum jeholense Nakai et Kitag	wind-cold-dispersing
3503	Thyroid hormone resistance, 188570 (3)	THRB, ERBA2, THR1	190160	3p24.3	Endocrine	生姜	生薑	Zingiber officinale	wind-cold-dispersing
3503	Thyroid hormone resistance, autosomal recessive, 274300 (3)	THRB, ERBA2, THR1	190160	3p24.3	Endocrine	麻黄根	麻黃根	Ephedra Root	anhidrotic medicinal
1504	Thyrotoxic periodic paralysis, susceptibility to, 188580 (3)	CACNA1S, CACNL1A3, CCHL1A3	114208	1q32	Endocrine	草麻黄	草麻黃	Ephedra sinica Stapf	anhidrotic medicinal
1505	Thyrotropin-releasing hormone resistance, generalized (3)	TRHR	188545	8q23	Endocrine	中麻黄	中麻黃	Ephedra intermedia Schrenk et Mey.	anhidrotic medicinal
3512	Total iodide organification defect, 274500 (3)	TPO, TPX	606765	2p25	Endocrine	北细辛	北細辛	Asarum heterotropoides	wind-cold-dispersing
53	Adrenal hyperplasia, congenital, due to combined P450C17 and P450C21 deficiency,201750 (3)	POR	124015	7q11.2	Endocrine	汉城细辛	漢城細辛	Asarum sieboldii	wind-cold-dispersing
108	Anderson disease, 607689 (3)	SARA2, SAR1B, CMRD	607690	5q31.1	Gastrointestinal	炮姜	炮薑	Zingiber officinale	meridian-warming hemostatic medicinal
132	Aplasia of lacrimal and salivary glands, 180920 (3)	FGF10	602115	5p13-p12	Gastrointestinal	艾叶	艾葉	Artemisia argyi	meridian-warming hemostatic medicinal
139	ARC syndrome, 208085 (3)	VPS33B	608552	15q26.1	Gastrointestinal	五味子	五味子	Schisandra chinensis	lung-intestine astringent medicinal
202	Bile acid malabsorption, primary (3)	SLC10A2, NTCP2	601295	13q33	Gastrointestinal	石榴皮	石榴皮	Punica granatum	lung-intestine astringent medicinal
308	Chloride diarrhea, congenital, Finnish type, 214700 (3)	SLC26A3, DRA, CLD	126650	7q22-q31.1	Gastrointestinal	肉豆蔻	肉豆蔻	Myristica fragrans	lung-intestine astringent medicinal
309	Cholelithiasis, 600803 (3)	ABCB4, PGY3, MDR3	171060	7q21.1	Gastrointestinal	五倍子	五倍子	Melaphis Chinensis	lung-intestine astringent medicinal
310	Cholestasis, benign recurrent intrahepatic, 243300 (3)	ATP8B1, FIC1, BRIC, PFIC1	602397	18q21	Gastrointestinal	乌梅(绿萼梅)	烏梅(綠萼梅)	Prunus mume	lung-intestine astringent medicinal
310	Cholestasis, familial intrahepatic, of pregnancy, 147480 (3)	ABCB4, PGY3, MDR3	171060	7q21.1	Gastrointestinal	诃子	訶子	Medicine Terminalia Fruit	lung-intestine astringent medicinal
310	Cholestasis, progressive familial intrahepatic 1, 211600 (3)	ATP8B1, FIC1, BRIC, PFIC1	602397	18q21	Gastrointestinal	诃子	訶子	Terminalia chebula	lung-intestine astringent medicinal
310	Cholestasis, progressive familial intrahepatic 2, 601847 (3)	ABCB11, BSEP, SPGP, PFIC2	603201	2q24	Gastrointestinal	炮姜	炮薑	Zingiber officinale	meridian-warming hemostatic medicinal
310	Cholestasis, progressive familial intrahepatic 3, 602347 (3)	ABCB4, PGY3, MDR3	171060	7q21.1	Gastrointestinal	艾叶	艾葉	Artemisia argyi	meridian-warming hemostatic medicinal
310	Cholestasis, progressive familial intrahepatic 4, 607765 (3)	HSD3B7, PFIC4	607764	16p12-p11.2	Gastrointestinal	五味子	五味子	Schisandra chinensis	lung-intestine astringent medicinal
330	Chylomicron retention disease with Marinesco-Sjogren syndrome, 607692 (3)	SARA2, SAR1B, CMRD	607690	5q31.1	Gastrointestinal	石榴皮	石榴皮	Punica granatum	lung-intestine astringent medicinal
330	Chylomicron retention disease, 246700 (3)	SARA2, SAR1B, CMRD	607690	5q31.1	Gastrointestinal	肉豆蔻	肉豆蔻	Myristica fragrans	lung-intestine astringent medicinal
334	Cirrhosis, cryptogenic (3)	KRT18	148070	12q13	Gastrointestinal	五倍子	五倍子	Melaphis Chinensis	lung-intestine astringent medicinal
334	Cirrhosis, cryptogenic (3)	KRT8	148060	12q13	Gastrointestinal	乌梅(绿萼梅)	烏梅(綠萼梅)	Prunus mume	lung-intestine astringent medicinal
334	Cirrhosis, noncryptogenic, susceptibility to, 215600 (3)	KRT18	148070	12q13	Gastrointestinal	诃子	訶子	Medicine Terminalia Fruit	lung-intestine astringent medicinal
334	Cirrhosis, noncryptogenic, susceptibility to, 215600 (3)	KRT8	148060	12q13	Gastrointestinal	诃子	訶子	Terminalia chebula	lung-intestine astringent medicinal
334	Cirrhosis, North American Indian childhood type, 604901 (3)	CIRH1A, NAIC, TEX292, KIAA1988	607456	16q22	Gastrointestinal	炮姜	炮薑	Zingiber officinale	meridian-warming hemostatic medicinal
347	Colonic aganglionosis, total, with small bowel involvement (3)	RET, MEN2A	164761	10q11.2	Gastrointestinal	艾叶	艾葉	Artemisia argyi	meridian-warming hemostatic medicinal
390	Crohn disease, susceptibility to, 266600 (3)	CARD15, NOD2, IBD1, CD, ACUG, PSORAS1	605956	16q12	Gastrointestinal	五味子	五味子	Schisandra chinensis	lung-intestine astringent medicinal
390	Crohn disease, susceptibility to, 266600 (3)	DLG5, PDLG, KIAA0583	604090	10q23	Gastrointestinal	石榴皮	石榴皮	Punica granatum	lung-intestine astringent medicinal
487	Enterokinase deficiency, 226200 (3)	PRSS7, ENTK	606635	21q21	Gastrointestinal	肉豆蔻	肉豆蔻	Myristica fragrans	lung-intestine astringent medicinal
535	Fibrocalculous pancreatic diabetes, susceptibility to (3)	SPINK1, PSTI, PCTT, TATI	167790	5q32	Gastrointestinal	五倍子	五倍子	Melaphis Chinensis	lung-intestine astringent medicinal
2584	Giant cell hepatitis, neonatal, 231100 (3)	CYP7B1	603711	8q21.3	Gastrointestinal	乌梅(绿萼梅)	烏梅(綠萼梅)	Prunus mume	lung-intestine astringent medicinal
666	Hepatic failure, early onset, and neurologic disorder (3)	SCOD1, SCO1	603644	17p13-p12	Gastrointestinal	诃子	訶子	Medicine Terminalia Fruit	lung-intestine astringent medicinal
681	Hirschsprung disease, 142623 (3)	EDN3	131242	20q13.2-q13.3	Gastrointestinal	诃子	訶子	Terminalia chebula	lung-intestine astringent medicinal
681	Hirschsprung disease, 142623 (3)	GDNF	600837	5p13.1-p12	Gastrointestinal	炮姜	炮薑	Zingiber officinale	meridian-warming hemostatic medicinal
681	Hirschsprung disease, 142623 (3)	NRTN, NTN	602018	19p13.3	Gastrointestinal	艾叶	艾葉	Artemisia argyi	meridian-warming hemostatic medicinal
681	Hirschsprung disease, 142623 (3)	RET, MEN2A	164761	10q11.2	Gastrointestinal	五味子	五味子	Schisandra chinensis	lung-intestine astringent medicinal
681	Hirschsprung disease, cardiac defects, and autonomic dysfunction (3)	ECE1	600423	1p36.1	Gastrointestinal	石榴皮	石榴皮	Punica granatum	lung-intestine astringent medicinal
681	Hirschsprung disease, short-segment, 142623 (3)	PMX2B, NBPHOX, PHOX2B	603851	4p12	Gastrointestinal	肉豆蔻	肉豆蔻	Myristica fragrans	lung-intestine astringent medicinal
681	Hirschsprung disease-2, 600155 (3)	EDNRB, HSCR2, ABCDS	131244	13q22	Gastrointestinal	五倍子	五倍子	Melaphis Chinensis	lung-intestine astringent medicinal
720	Hyperbilirubinemia, familial transcient neonatal, 237900 (3)	UGT1A1, UGT1, GNT1	191740	2q37	Gastrointestinal	乌梅(绿萼梅)	烏梅(綠萼梅)	Prunus mume	lung-intestine astringent medicinal
723	Hypercholanemia, familial, 607748 (3)	BAAT	602938	9q22.3	Gastrointestinal	诃子	訶子	Medicine Terminalia Fruit	lung-intestine astringent medicinal
723	Hypercholanemia, familial, 607748 (3)	EPHX1	132810	1q42.1	Gastrointestinal	诃子	訶子	Terminalia chebula	lung-intestine astringent medicinal
723	Hypercholanemia, familial, 607748 (3)	TJP2, ZO2	607709	9q12-q13	Gastrointestinal	炮姜	炮薑	Zingiber officinale	meridian-warming hemostatic medicinal
758	Hypertrypsinemia, neonatal (3)	CFTR, ABCC7, CF, MRP7	602421	7q31.2	Gastrointestinal	艾叶	艾葉	Artemisia argyi	meridian-warming hemostatic medicinal
3178	Pancreatic agenesis, 260370 (3)	IPF1	600733	13q12.1	Gastrointestinal	五味子	五味子	Schisandra chinensis	lung-intestine astringent medicinal
1179	Pancreatitis, hereditary, 167800 (3)	PRSS1, TRY1	276000	7q35	Gastrointestinal	石榴皮	石榴皮	Punica granatum	lung-intestine astringent medicinal
1179	Pancreatitis, hereditary, 167800 (3)	SPINK1, PSTI, PCTT, TATI	167790	5q32	Gastrointestinal	肉豆蔻	肉豆蔻	Myristica fragrans	lung-intestine astringent medicinal
1179	Pancreatitis, idiopathic (3)	CFTR, ABCC7, CF, MRP7	602421	7q31.2	Gastrointestinal	五倍子	五倍子	Melaphis Chinensis	lung-intestine astringent medicinal
3241	Polycystic liver disease, 174050 (3)	PRKCSH, G19P1, PCLD	177060	19p13.2-p13.1	Gastrointestinal	乌梅(绿萼梅)	烏梅(綠萼梅)	Prunus mume	lung-intestine astringent medicinal
3241	Polycystic liver disease, 174050 (3)	SEC63	608648	6q21	Gastrointestinal	诃子	訶子	Medicine Terminalia Fruit	lung-intestine astringent medicinal
1529	Tropical calcific pancreatitis, 608189 (3)	SPINK1, PSTI, PCTT, TATI	167790	5q32	Gastrointestinal	诃子	訶子	Terminalia chebula	lung-intestine astringent medicinal
21	Acatalasemia (3)	CAT	115500	11p13	Hematological	川贝母	川貝母	Fritillaria cirrhosa	clearing and heat-phlegm resolving medicinal
58	Adult i phenotype with congenital cataract, 110800 (3)	GCNT2	600429	6p24-p23	Hematological	梭砂贝母	梭砂貝母	Fritillaria delavayi	clearing and heat-phlegm resolving medicinal
58	Adult i phenotype without cataract, 110800 (3)	GCNT2	600429	6p24-p23	Hematological	甘肃贝母	甘肅貝母	Fritillaria przewalskii Maxim. ex Batal.	clearing and heat-phlegm resolving medicinal
61	Afibrinogenemia, 202400 (3)	FGA	134820	4q28	Hematological	暗紫贝母	暗紫貝母	Fritillaria unibracteata Hsiao et K.C. Hsiao	clearing and heat-phlegm resolving medicinal
61	Afibrinogenemia, congenital, 202400 (3)	FGB	134830	4q28	Hematological	竹茹	竹茹	Bamboo Shavings	clearing and heat-phlegm resolving medicinal
63	Agammaglobulinemia, 601495 (3)	IGHM, MU	147020	14q32.33	Hematological	青秆竹	青秆竹	Bambusa tuldoides	clearing and heat-phlegm resolving medicinal
63	Agammaglobulinemia, autosomal recessive (3)	IGLL1, IGO, IGL5, VPREB2	146770	22q11.21	Hematological	淡竹	淡竹	Phyllostachys nigra	clearing and heat-phlegm resolving medicinal
63	Agammaglobulinemia, non-Bruton type, 601495 (3)	LRRC8, KIAA1437	608360	9q34.13	Hematological	浙贝母	浙貝母	Fritillaria thunbergii	clearing and heat-phlegm resolving medicinal
63	Agammaglobulinemia, type 1, X-linked (3)	BTK, AGMX1, IMD1, XLA, AT	300300	Xq21.3-q22	Hematological	平贝母	平貝母	Fritillaria ussuriensis	clearing and heat-phlegm resolving medicinal
92	Alpha-thalassemia myelodysplasia syndrome, somatic, 300448 (3)	ATRX, XH2, XNP, MRXS3, SHS	300032	Xq13	Hematological	伊犁贝母	伊犁貝母	Fritillaria pallidiflora	clearing and heat-phlegm resolving medicinal
92	Alpha-thalassemia/mental retardation syndrome, 301040 (3)	ATRX, XH2, XNP, MRXS3, SHS	300032	Xq13	Hematological	新疆贝母	新疆貝母	Fritillaria walujewii	clearing and heat-phlegm resolving medicinal
101	AMP deaminase deficiency, erythrocytic (3)	AMPD3	102772	11pter-p13	Hematological	前胡	前胡	Angelica decursiva	clearing and heat-phlegm resolving medicinal
105	Analbuminemia (3)	ALB	103600	4q11-q13	Hematological	白花前胡	白花前胡	Peucedanum praeruptorum	clearing and heat-phlegm resolving medicinal
110	Anemia, congenital dyserythropoietic, type I, 224120 (3)	CDAN1, CDA1	607465	15q15	Hematological	紫花前胡	紫花前胡	Peucedanum decursivum	clearing and heat-phlegm resolving medicinal
110	Anemia, Diamond-Blackfan, 105650 (3)	RPS19, DBA	603474	19q13.2	Hematological	桔梗	桔梗	Platycodon grandiflorum	clearing and heat-phlegm resolving medicinal
110	Anemia, hemolytic, due to PK deficiency (3)	PKLR, PK1	266200	1q21	Hematological	海藻	海藻	Seaweed	clearing and heat-phlegm resolving medicinal
110	Anemia, hemolytic, due to UMPH1 deficiency, 266120 (3)	NT5C3, UMPH1, PSN1	606224	7p15-p14	Hematological	海蒿子	海蒿子	Sargassum pallidum	clearing and heat-phlegm resolving medicinal
110	Anemia, hemolytic, Rh-null, regulator type, 268150 (3)	RHAG, RH50A	180297	6p21.1-p11	Hematological	羊栖菜	羊栖菜	Sargassum fusiforme	clearing and heat-phlegm resolving medicinal
110	Anemia, hypochromic microcytic, 206100 (3)	NRAMP2	600523	12q13	Hematological	瓜蒌	瓜蔞	Snakegourd Fruit	clearing and heat-phlegm resolving medicinal
110	Anemia, neonatal hemolytic, fatal and near-fatal (3)	SPTB	182870	14q22-q23.2	Hematological	植物瓜蒌	植物瓜蔞	Trichosanthes kirilowii	clearing and heat-phlegm resolving medicinal
110	Anemia, sideroblastic, with ataxia, 301310 (3)	ABCB7, ABC7, ASAT	300135	Xq13.1-q13.3	Hematological	双边瓜蒌	雙邊瓜蔞	Trichosanthes rosthornii	clearing and heat-phlegm resolving medicinal
110	Anemia, sideroblastic/hypochromic (3)	ALAS2, ANH1, ASB	301300	Xp11.21	Hematological	昆布	昆布	Laminaria japonica	clearing and heat-phlegm resolving medicinal
118	Anhaptoglobinemia (3)	HP	140100	16q22.1	Hematological	胖大海	胖大海	Sterculia lychnophora	clearing and heat-phlegm resolving medicinal
127	Antithrombin III deficiency (3)	AT3	107300	1q23-q25	Hematological	川贝母	川貝母	Fritillaria cirrhosa D. Don	clearing and heat-phlegm resolving medicinal
133	Aplastic anemia, 609135 (3)	IFNG	147570	12q14	Hematological	前胡	前胡	Hogfennel Root	clearing and heat-phlegm resolving medicinal
133	Aplastic anemia, 609135 (3)	TERC, TRC3, TR	602322	3q21-q28	Hematological	浙贝母	浙貝母	Fritillaria verticillata	clearing and heat-phlegm resolving medicinal
133	Aplastic anemia, susceptibility to, 609135 (3)	TERT, TCS1, EST2	187270	5p15.33	Hematological	蒺藜	蒺藜	Tribulus terrestris	liver-pacifying and wind-extinguishing medicinal
165	Atransferrinemia, 209300 (3)	TF	190000	3q21	Hematological	罗布麻	羅布麻	Apocynum venetum	liver-pacifying and wind-extinguishing medicinal
196	Bernard-Soulier syndrome, 231200 (3)	GP1BA	606672	17pter-p12	Hematological	川贝母	川貝母	Fritillaria cirrhosa	clearing and heat-phlegm resolving medicinal
196	Bernard-Soulier syndrome, type B, 231200 (3)	GP1BB	138720	22q11.2	Hematological	梭砂贝母	梭砂貝母	Fritillaria delavayi	clearing and heat-phlegm resolving medicinal
196	Bernard-Soulier syndrome, type C (3)	GP9	173515	Chr.3	Hematological	甘肃贝母	甘肅貝母	Fritillaria przewalskii Maxim. ex Batal.	clearing and heat-phlegm resolving medicinal
209	Bleeding disorder due to defective thromboxane A2 receptor (3)	TBXA2R	188070	19p13.3	Hematological	暗紫贝母	暗紫貝母	Fritillaria unibracteata Hsiao et K.C. Hsiao	clearing and heat-phlegm resolving medicinal
209	Bleeding due to platelet ADP receptor defect, 600515 (3)	P2RX1, P2X1	600845	17p13.3	Hematological	竹茹	竹茹	Bamboo Shavings	clearing and heat-phlegm resolving medicinal
212	Blood group Cromer (3)	DAF	125240	1q32	Hematological	青秆竹	青秆竹	Bambusa tuldoides	clearing and heat-phlegm resolving medicinal
212	Blood group GIL, 607457 (3)	AQP3	600170	9p13	Hematological	淡竹	淡竹	Phyllostachys nigra	clearing and heat-phlegm resolving medicinal
212	Blood group, ABO system (3)	ABO	110300	9q34	Hematological	浙贝母	浙貝母	Fritillaria thunbergii	clearing and heat-phlegm resolving medicinal
212	Blood group, Auberger system (3)	LU, AU, BCAM	111200	19q13.2	Hematological	平贝母	平貝母	Fritillaria ussuriensis	clearing and heat-phlegm resolving medicinal
212	Blood group, Colton, 110450 (3)	AQP1, CHIP28, CO	107776	7p14	Hematological	伊犁贝母	伊犁貝母	Fritillaria pallidiflora	clearing and heat-phlegm resolving medicinal
212	Blood group, Diego, 110500 (3)	SLC4A1, AE1, EPB3	109270	17q21-q22	Hematological	新疆贝母	新疆貝母	Fritillaria walujewii	clearing and heat-phlegm resolving medicinal
212	Blood group, Dombrock (3)	ART4, DO	110600	12p13-p12	Hematological	前胡	前胡	Angelica decursiva	clearing and heat-phlegm resolving medicinal
212	Blood group, Gerbich (3)	GYPC, GE, GPC	110750	2q14-q21	Hematological	白花前胡	白花前胡	Peucedanum praeruptorum	clearing and heat-phlegm resolving medicinal
212	Blood group, Ii, 110800 (3)	GCNT2	600429	6p24-p23	Hematological	紫花前胡	紫花前胡	Peucedanum decursivum	clearing and heat-phlegm resolving medicinal
212	Blood group, Indian system (3)	CD44, MDU2, MDU3, MIC4	107269	11pter-p13	Hematological	桔梗	桔梗	Platycodon grandiflorum	clearing and heat-phlegm resolving medicinal
212	Blood group, Kell (3)	KEL	110900	7q33	Hematological	海藻	海藻	Seaweed	clearing and heat-phlegm resolving medicinal
212	Blood group, Kidd (3)	SLC14A1, JK, UTE, UT1	111000	18q11-q12	Hematological	海蒿子	海蒿子	Sargassum pallidum	clearing and heat-phlegm resolving medicinal
212	Blood group, Knops system, 607486 (3)	CR1, C3BR	120620	1q32	Hematological	羊栖菜	羊栖菜	Sargassum fusiforme	clearing and heat-phlegm resolving medicinal
212	Blood group, Landsteiner-Wiener (3)	LW	111250	19p13.3	Hematological	瓜蒌	瓜蔞	Snakegourd Fruit	clearing and heat-phlegm resolving medicinal
212	Blood group, Lewis (3)	FUT3, LE	111100	19p13.3	Hematological	植物瓜蒌	植物瓜蔞	Trichosanthes kirilowii	clearing and heat-phlegm resolving medicinal
212	Blood group, Lutheran system (3)	LU, AU, BCAM	111200	19q13.2	Hematological	双边瓜蒌	雙邊瓜蔞	Trichosanthes rosthornii	clearing and heat-phlegm resolving medicinal
212	Blood group, MN (3)	GYPA, MN, GPA	111300	4q28.2-q31.1	Hematological	昆布	昆布	Laminaria japonica	clearing and heat-phlegm resolving medicinal
212	Blood group, OK, 111380 (3)	BSG	109480	19p13.3	Hematological	胖大海	胖大海	Sterculia lychnophora	clearing and heat-phlegm resolving medicinal
212	Blood group, P system, 111400 (3)	A4GALT, PK	607922	22q13.2	Hematological	川贝母	川貝母	Fritillaria cirrhosa D. Don	clearing and heat-phlegm resolving medicinal
212	Blood group, P system, 111400 (3)	B3GALT3, GLCT3, P	603094	3q25	Hematological	前胡	前胡	Hogfennel Root	clearing and heat-phlegm resolving medicinal
212	Blood group, Rhesus (3)	RHCE	111700	1p36.2-p34	Hematological	浙贝母	浙貝母	Fritillaria verticillata	clearing and heat-phlegm resolving medicinal
212	Blood group, Ss (3)	GYPB, SS, MNS	111740	4q28-q31	Hematological	蒺藜	蒺藜	Tribulus terrestris	liver-pacifying and wind-extinguishing medicinal
212	Blood group, Waldner, 112010 (3)	SLC4A1, AE1, EPB3	109270	17q21-q22	Hematological	罗布麻	羅布麻	Apocynum venetum	liver-pacifying and wind-extinguishing medicinal
212	Blood group, Wright, 112050 (3)	SLC4A1, AE1, EPB3	109270	17q21-q22	Hematological	川贝母	川貝母	Fritillaria cirrhosa	clearing and heat-phlegm resolving medicinal
212	Blood group, XG system (3)	XG	314700	Xpter-p22.32	Hematological	梭砂贝母	梭砂貝母	Fritillaria delavayi	clearing and heat-phlegm resolving medicinal
212	Blood group, Yt system, 112100 (3)	ACHE, YT	100740	7q22	Hematological	甘肃贝母	甘肅貝母	Fritillaria przewalskii Maxim. ex Batal.	clearing and heat-phlegm resolving medicinal
216	Bombay phenotype (3)	FUT1, H, HH	211100	19q13.3	Hematological	暗紫贝母	暗紫貝母	Fritillaria unibracteata Hsiao et K.C. Hsiao	clearing and heat-phlegm resolving medicinal
216	Bombay phenotype (3)	FUT2, SE	182100	19q13.3	Hematological	竹茹	竹茹	Bamboo Shavings	clearing and heat-phlegm resolving medicinal
264	Carboxypeptidase N deficiency, 212070 (3)	CPN1, SCPN, CPN	603103	10q24.2	Hematological	青秆竹	青秆竹	Bambusa tuldoides	clearing and heat-phlegm resolving medicinal
350	Combined factor V and VIII deficiency, 227300 (3)	LMAN1, ERGIC53, F5F8D, MCFD1	601567	18q21.3-q22	Hematological	淡竹	淡竹	Phyllostachys nigra	clearing and heat-phlegm resolving medicinal
370	Coumarin resistance, 122700 (3)	CYP2A6, CYP2A3, CYP2A, P450C2A	122720	19q13.2	Hematological	浙贝母	浙貝母	Fritillaria thunbergii	clearing and heat-phlegm resolving medicinal
453	Dysalbuminemic hyperthyroxinemia (3)	ALB	103600	4q11-q13	Hematological	平贝母	平貝母	Fritillaria ussuriensis	clearing and heat-phlegm resolving medicinal
456	Dyserythropoietic anemia with thrombocytopenia, 300367 (3)	GATA1, GF1, ERYF1, NFE1	305371	Xp11.23	Hematological	伊犁贝母	伊犁貝母	Fritillaria pallidiflora	clearing and heat-phlegm resolving medicinal
457	Dysfibrinogenemia, alpha type, causing bleeding diathesis (3)	FGA	134820	4q28	Hematological	新疆贝母	新疆貝母	Fritillaria walujewii	clearing and heat-phlegm resolving medicinal
457	Dysfibrinogenemia, alpha type, causing recurrent thrombosis (3)	FGA	134820	4q28	Hematological	前胡	前胡	Angelica decursiva	clearing and heat-phlegm resolving medicinal
457	Dysfibrinogenemia, beta type (3)	FGB	134830	4q28	Hematological	白花前胡	白花前胡	Peucedanum praeruptorum	clearing and heat-phlegm resolving medicinal
457	Dysfibrinogenemia, gamma type (3)	FGG	134850	4q28	Hematological	紫花前胡	紫花前胡	Peucedanum decursivum	clearing and heat-phlegm resolving medicinal
460	Dysprothrombinemia (3)	F2	176930	11p11-q12	Hematological	桔梗	桔梗	Platycodon grandiflorum	clearing and heat-phlegm resolving medicinal
463	Dystransthyretinemic hyperthyroxinemia(3)	TTR, PALB	176300	18q11.2-q12.1	Hematological	海藻	海藻	Seaweed	clearing and heat-phlegm resolving medicinal
472	Elliptocytosis, Malaysian-Melanesian type (3)	SLC4A1, AE1, EPB3	109270	17q21-q22	Hematological	海蒿子	海蒿子	Sargassum pallidum	clearing and heat-phlegm resolving medicinal
472	Elliptocytosis-1 (3)	EPB41, EL1	130500	1p36.2-p34	Hematological	羊栖菜	羊栖菜	Sargassum fusiforme	clearing and heat-phlegm resolving medicinal
472	Elliptocytosis-2 (3)	SPTA1	182860	1q21	Hematological	瓜蒌	瓜蔞	Snakegourd Fruit	clearing and heat-phlegm resolving medicinal
472	Elliptocytosis-3 (3)	SPTB	182870	14q22-q23.2	Hematological	植物瓜蒌	植物瓜蔞	Trichosanthes kirilowii	clearing and heat-phlegm resolving medicinal
491	Eosinophil peroxidase deficiency, 261500 (3)	EPX	131399	17q23.1	Hematological	双边瓜蒌	雙邊瓜蔞	Trichosanthes rosthornii	clearing and heat-phlegm resolving medicinal
500	Epstein syndrome, 153650 (3)	MYH9, MHA, FTNS, DFNA17	160775	22q11.2	Hematological	昆布	昆布	Laminaria japonica	clearing and heat-phlegm resolving medicinal
504	Erythremias, alpha- (3)	HBA1	141800	16pter-p13.3	Hematological	胖大海	胖大海	Sterculia lychnophora	clearing and heat-phlegm resolving medicinal
504	Erythremias, beta- (3)	HBB	141900	11p15.5	Hematological	川贝母	川貝母	Fritillaria cirrhosa D. Don	clearing and heat-phlegm resolving medicinal
505	Erythrocytosis (3)	HBA2	141850	16pter-p13.3	Hematological	前胡	前胡	Hogfennel Root	clearing and heat-phlegm resolving medicinal
505	Erythrocytosis, familial, 133100 (3)	EPOR	133171	19p13.3-p13.2	Hematological	浙贝母	浙貝母	Fritillaria verticillata	clearing and heat-phlegm resolving medicinal
520	Factor H and factor H-like 1 (3)	HF1, CFH, HUS	134370	1q32	Hematological	蒺藜	蒺藜	Tribulus terrestris	liver-pacifying and wind-extinguishing medicinal
520	Factor V and factor VIII, combined deficiency of, 227300 (3)	MCFD2	607788	2p21-p16.3	Hematological	罗布麻	羅布麻	Apocynum venetum	liver-pacifying and wind-extinguishing medicinal
520	Factor VII deficiency (3)	F7	227500	13q34	Hematological	川贝母	川貝母	Fritillaria cirrhosa	clearing and heat-phlegm resolving medicinal
520	Factor X deficiency (3)	F10	227600	13q34	Hematological	梭砂贝母	梭砂貝母	Fritillaria delavayi	clearing and heat-phlegm resolving medicinal
520	Factor XI deficiency, autosomal dominant (3)	F11	264900	4q35	Hematological	甘肃贝母	甘肅貝母	Fritillaria przewalskii Maxim. ex Batal.	clearing and heat-phlegm resolving medicinal
520	Factor XI deficiency, autosomal recessive (3)	F11	264900	4q35	Hematological	暗紫贝母	暗紫貝母	Fritillaria unibracteata Hsiao et K.C. Hsiao	clearing and heat-phlegm resolving medicinal
520	Factor XII deficiency (3)	F12, HAF	234000	5q33-qter	Hematological	竹茹	竹茹	Bamboo Shavings	clearing and heat-phlegm resolving medicinal
520	Factor XIIIA deficiency (3)	F13A1, F13A	134570	6p25-p24	Hematological	青秆竹	青秆竹	Bambusa tuldoides	clearing and heat-phlegm resolving medicinal
520	Factor XIIIB deficiency (3)	F13B	134580	1q31-q32.1	Hematological	淡竹	淡竹	Phyllostachys nigra	clearing and heat-phlegm resolving medicinal
542	Fitzgerald factor deficiency (3)	KNG	228960	3q27	Hematological	浙贝母	浙貝母	Fritillaria thunbergii	clearing and heat-phlegm resolving medicinal
584	Giant platelet disorder, isolated (3)	GP1BB	138720	22q11.2	Hematological	平贝母	平貝母	Fritillaria ussuriensis	clearing and heat-phlegm resolving medicinal
588	Glanzmann thrombasthenia, type A, 273800 (3)	ITGA2B, GP2B, CD41B	607759	17q21.32	Hematological	伊犁贝母	伊犁貝母	Fritillaria pallidiflora	clearing and heat-phlegm resolving medicinal
588	Glanzmann thrombasthenia, type B (3)	ITGB3, GP3A	173470	17q21.32	Hematological	新疆贝母	新疆貝母	Fritillaria walujewii	clearing and heat-phlegm resolving medicinal
648	Heinz body anemia (3)	HBA2	141850	16pter-p13.3	Hematological	前胡	前胡	Angelica decursiva	clearing and heat-phlegm resolving medicinal
648	Heinz body anemias, alpha- (3)	HBA1	141800	16pter-p13.3	Hematological	白花前胡	白花前胡	Peucedanum praeruptorum	clearing and heat-phlegm resolving medicinal
648	Heinz body anemias, beta- (3)	HBB	141900	11p15.5	Hematological	紫花前胡	紫花前胡	Peucedanum decursivum	clearing and heat-phlegm resolving medicinal
652	Hematopoiesis, cyclic, 162800 (3)	ELA2	130130	19p13.3	Hematological	桔梗	桔梗	Platycodon grandiflorum	clearing and heat-phlegm resolving medicinal
659	Hemoglobin H disease (3)	HBA2	141850	16pter-p13.3	Hematological	海藻	海藻	Seaweed	clearing and heat-phlegm resolving medicinal
660	Hemolytic anemia due to adenylate kinase deficiency (3)	AK1	103000	9q34.1	Hematological	海蒿子	海蒿子	Sargassum pallidum	clearing and heat-phlegm resolving medicinal
660	Hemolytic anemia due to band 3 defect defect (3)	SLC4A1, AE1, EPB3	109270	17q21-q22	Hematological	羊栖菜	羊栖菜	Sargassum fusiforme	clearing and heat-phlegm resolving medicinal
660	Hemolytic anemia due to bisphosphoglycerate mutase deficiency (3)	BPGM	222800	7q31-q34	Hematological	瓜蒌	瓜蔞	Snakegourd Fruit	clearing and heat-phlegm resolving medicinal
660	Hemolytic anemia due to G6PD deficiency (3)	G6PD, G6PD1	305900	Xq28	Hematological	植物瓜蒌	植物瓜蔞	Trichosanthes kirilowii	clearing and heat-phlegm resolving medicinal
660	Hemolytic anemia due to gamma-glutamylcysteine synthetase deficiency, 230450 (3)	GCLC, GLCLC	606857	6p12	Hematological	双边瓜蒌	雙邊瓜蔞	Trichosanthes rosthornii	clearing and heat-phlegm resolving medicinal
660	Hemolytic anemia due to glucosephosphate isomerase deficiency (3)	GPI	172400	19q13.1	Hematological	昆布	昆布	Laminaria japonica	clearing and heat-phlegm resolving medicinal
660	Hemolytic anemia due to glutathione synthetase deficiency, 231900 (3)	GSS, GSHS	601002	20q11.2	Hematological	胖大海	胖大海	Sterculia lychnophora	clearing and heat-phlegm resolving medicinal
660	Hemolytic anemia due to hexokinase deficiency (3)	HK1	142600	10q22	Hematological	川贝母	川貝母	Fritillaria cirrhosa D. Don	clearing and heat-phlegm resolving medicinal
660	Hemolytic anemia due to PGK deficiency (3)	PGK1, PGKA	311800	Xq13	Hematological	前胡	前胡	Hogfennel Root	clearing and heat-phlegm resolving medicinal
660	Hemolytic anemia due to triosephosphate isomerase deficiency (3)	TPI1	190450	12p13	Hematological	浙贝母	浙貝母	Fritillaria verticillata	clearing and heat-phlegm resolving medicinal
661	Hemolytic-uremic syndrome, 235400 (3)	HF1, CFH, HUS	134370	1q32	Hematological	蒺藜	蒺藜	Tribulus terrestris	liver-pacifying and wind-extinguishing medicinal
662	Hemophagocytic lymphohistiocytosis, familial, 2, 603553 (3)	PRF1, HPLH2	170280	10q22	Hematological	罗布麻	羅布麻	Apocynum venetum	liver-pacifying and wind-extinguishing medicinal
662	Hemophagocytic lymphohistiocytosis, familial, 3, 608898 (3)	UNC13D, MUNC13-4, HPLH3, HLH3, FHL3	608897	17q25.1	Hematological	川贝母	川貝母	Fritillaria cirrhosa	clearing and heat-phlegm resolving medicinal
663	Hemophilia A (3)	F8, F8C, HEMA	306700	Xq28	Hematological	梭砂贝母	梭砂貝母	Fritillaria delavayi	clearing and heat-phlegm resolving medicinal
663	Hemophilia B (3)	F9, HEMB	306900	Xq27.1-q27.2	Hematological	甘肃贝母	甘肅貝母	Fritillaria przewalskii Maxim. ex Batal.	clearing and heat-phlegm resolving medicinal
664	Hemorrhagic diathesis due to \`antithrombin\' Pittsburgh (3)	PI, AAT	107400	14q32.1	Hematological	暗紫贝母	暗紫貝母	Fritillaria unibracteata Hsiao et K.C. Hsiao	clearing and heat-phlegm resolving medicinal
664	Hemorrhagic diathesis due to factor V deficiency (3)	F5	227400	1q23	Hematological	竹茹	竹茹	Bamboo Shavings	clearing and heat-phlegm resolving medicinal
665	Hemosiderosis, systemic, due to aceruloplasminemia, 604290 (3)	CP	117700	3q23-q24	Hematological	青秆竹	青秆竹	Bambusa tuldoides	clearing and heat-phlegm resolving medicinal
2669	Hereditary persistence of alpha-fetoprotein (3)	AFP, HPAFP	104150	4q11-q13	Hematological	淡竹	淡竹	Phyllostachys nigra	clearing and heat-phlegm resolving medicinal
679	High-molecular-weight kininogen deficiency (3)	KNG	228960	3q27	Hematological	浙贝母	浙貝母	Fritillaria thunbergii	clearing and heat-phlegm resolving medicinal
703	HPFH, deletion type (3)	HBB	141900	11p15.5	Hematological	平贝母	平貝母	Fritillaria ussuriensis	clearing and heat-phlegm resolving medicinal
703	HPFH, nondeletion type A (3)	HBG1	142200	11p15.5	Hematological	伊犁贝母	伊犁貝母	Fritillaria pallidiflora	clearing and heat-phlegm resolving medicinal
703	HPFH, nondeletion type G (3)	HBG2	142250	11p15.5	Hematological	新疆贝母	新疆貝母	Fritillaria walujewii	clearing and heat-phlegm resolving medicinal
726	Hypereosinophilic syndrome, idiopathic, resistant to imatinib, 607685 (3)	PDGFRA	173490	4q12	Hematological	前胡	前胡	Angelica decursiva	clearing and heat-phlegm resolving medicinal
751	Hyperprothrombinemia (3)	F2	176930	11p11-q12	Hematological	白花前胡	白花前胡	Peucedanum praeruptorum	clearing and heat-phlegm resolving medicinal
768	Hypochromic microcytic anemia (3)	HBA2	141850	16pter-p13.3	Hematological	紫花前胡	紫花前胡	Peucedanum decursivum	clearing and heat-phlegm resolving medicinal
770	Hypofibrinogenemia, gamma type (3)	FGG	134850	4q28	Hematological	桔梗	桔梗	Platycodon grandiflorum	clearing and heat-phlegm resolving medicinal
775	Hypohaptoglobinemia (3)	HP	140100	16q22.1	Hematological	海藻	海藻	Seaweed	clearing and heat-phlegm resolving medicinal
786	Hypoprothrombinemia (3)	F2	176930	11p11-q12	Hematological	海蒿子	海蒿子	Sargassum pallidum	clearing and heat-phlegm resolving medicinal
820	Intrinsic factor deficiency, 261000 (3)	GIF, IF	609342	11q13	Hematological	羊栖菜	羊栖菜	Sargassum fusiforme	clearing and heat-phlegm resolving medicinal
824	Iron deficiency anemia, susceptibility to (3)	TF	190000	3q21	Hematological	瓜蒌	瓜蔞	Snakegourd Fruit	clearing and heat-phlegm resolving medicinal
824	Iron overload, autosomal dominant (3)	FTH1, FTHL6	134770	11q12-q13	Hematological	植物瓜蒌	植物瓜蔞	Trichosanthes kirilowii	clearing and heat-phlegm resolving medicinal
851	Kininogen deficiency (3)	KNG	228960	3q27	Hematological	双边瓜蒌	雙邊瓜蔞	Trichosanthes rosthornii	clearing and heat-phlegm resolving medicinal
921	Lymphedema and ptosis, 153000 (3)	FOXC2, FKHL14, MFH1	602402	16q24.3	Hematological	昆布	昆布	Laminaria japonica	clearing and heat-phlegm resolving medicinal
921	Lymphedema, hereditary I, 153100 (3)	FLT4, VEGFR3, PCL	136352	5q35.3	Hematological	胖大海	胖大海	Sterculia lychnophora	clearing and heat-phlegm resolving medicinal
921	Lymphedema, hereditary II, 153200 (3)	FOXC2, FKHL14, MFH1	602402	16q24.3	Hematological	川贝母	川貝母	Fritillaria cirrhosa D. Don	clearing and heat-phlegm resolving medicinal
921	Lymphedema-distichiasis syndrome with renal disease and diabetes mellitus (3)	FOXC2, FKHL14, MFH1	602402	16q24.3	Hematological	前胡	前胡	Hogfennel Root	clearing and heat-phlegm resolving medicinal
921	Lymphedema-distichiasis syndrome, 153400 (3)	FOXC2, FKHL14, MFH1	602402	16q24.3	Hematological	浙贝母	浙貝母	Fritillaria verticillata	clearing and heat-phlegm resolving medicinal
935	Macrocytic anemia, refractory, of 5q- syndrome, 153550 (3)	IRF1, MAR	147575	5q31.1	Hematological	蒺藜	蒺藜	Tribulus terrestris	liver-pacifying and wind-extinguishing medicinal
936	Macrothrombocytopenia, 300367 (3)	GATA1, GF1, ERYF1, NFE1	305371	Xp11.23	Hematological	罗布麻	羅布麻	Apocynum venetum	liver-pacifying and wind-extinguishing medicinal
961	May-Hegglin anomaly, 155100 (3)	MYH9, MHA, FTNS, DFNA17	160775	22q11.2	Hematological	川贝母	川貝母	Fritillaria cirrhosa	clearing and heat-phlegm resolving medicinal
965	McLeod syndrome (3)	XK	314850	Xp21.2-p21.1	Hematological	梭砂贝母	梭砂貝母	Fritillaria delavayi	clearing and heat-phlegm resolving medicinal
965	McLeod syndrome with neuroacanthosis (3)	XK	314850	Xp21.2-p21.1	Hematological	甘肃贝母	甘肅貝母	Fritillaria przewalskii Maxim. ex Batal.	clearing and heat-phlegm resolving medicinal
975	Megaloblastic anemia-1, Finnish type, 261100 (3)	CUBN, IFCR, MGA1	602997	10p12.1	Hematological	暗紫贝母	暗紫貝母	Fritillaria unibracteata Hsiao et K.C. Hsiao	clearing and heat-phlegm resolving medicinal
975	Megaloblastic anemia-1, Norwegian type, 261100 (3)	AMN	605799	14q32	Hematological	竹茹	竹茹	Bamboo Shavings	clearing and heat-phlegm resolving medicinal
999	Methemoglobinemia due to cytochrome b5 deficiency (3)	CYB5	250790	18q23	Hematological	青秆竹	青秆竹	Bambusa tuldoides	clearing and heat-phlegm resolving medicinal
999	Methemoglobinemia, type I (3)	DIA1	250800	22q13.31-qter	Hematological	淡竹	淡竹	Phyllostachys nigra	clearing and heat-phlegm resolving medicinal
999	Methemoglobinemia, type II (3)	DIA1	250800	22q13.31-qter	Hematological	浙贝母	浙貝母	Fritillaria thunbergii	clearing and heat-phlegm resolving medicinal
999	Methemoglobinemias, alpha- (3)	HBA1	141800	16pter-p13.3	Hematological	平贝母	平貝母	Fritillaria ussuriensis	clearing and heat-phlegm resolving medicinal
999	Methemoglobinemias, beta- (3)	HBB	141900	11p15.5	Hematological	伊犁贝母	伊犁貝母	Fritillaria pallidiflora	clearing and heat-phlegm resolving medicinal
1046	Myelofibrosis, idiopathic, 254450 (3)	JAK2	147796	9p24	Hematological	新疆贝母	新疆貝母	Fritillaria walujewii	clearing and heat-phlegm resolving medicinal
1101	Neutropenia, alloimmune neonatal (3)	FCGR3A, CD16, IGFR3	146740	1q23	Hematological	前胡	前胡	Angelica decursiva	clearing and heat-phlegm resolving medicinal
1101	Neutropenia, congenital, 202700 (3)	ELA2	130130	19p13.3	Hematological	白花前胡	白花前胡	Peucedanum praeruptorum	clearing and heat-phlegm resolving medicinal
1101	Neutropenia, severe congenital, 202700 (3)	GFI1, ZNF163	600871	1p22	Hematological	紫花前胡	紫花前胡	Peucedanum decursivum	clearing and heat-phlegm resolving medicinal
1101	Neutropenia, severe congenital, X-linked, 300299 (3)	WAS, IMD2, THC	300392	Xp11.23-p11.22	Hematological	桔梗	桔梗	Platycodon grandiflorum	clearing and heat-phlegm resolving medicinal
3195	Paroxysmal nocturnal hemoglobinuria (3)	PIGA	311770	Xp22.1	Hematological	海藻	海藻	Seaweed	clearing and heat-phlegm resolving medicinal
1199	Pelger-Huet anomaly, 169400 (3)	LBR, PHA	600024	1q42.1	Hematological	海蒿子	海蒿子	Sargassum pallidum	clearing and heat-phlegm resolving medicinal
1234	Plasmin inhibitor deficiency (3)	PLI, SERPINF2	262850	17pter-p12	Hematological	羊栖菜	羊栖菜	Sargassum fusiforme	clearing and heat-phlegm resolving medicinal
1235	Plasminogen Tochigi disease (3)	PLG	173350	6q26	Hematological	瓜蒌	瓜蔞	Snakegourd Fruit	clearing and heat-phlegm resolving medicinal
1237	Platelet ADP receptor defect (3)	P2RY12, P2Y12	600515	3q24-q25	Hematological	植物瓜蒌	植物瓜蔞	Trichosanthes kirilowii	clearing and heat-phlegm resolving medicinal
1237	Platelet disorder, familial, with associated myeloid malignancy, 601399 (3)	RUNX1, CBFA2, AML1	151385	21q22.3	Hematological	双边瓜蒌	雙邊瓜蔞	Trichosanthes rosthornii	clearing and heat-phlegm resolving medicinal
1237	Platelet glycoprotein IV deficiency, 608404 (3)	CD36	173510	7q11.2	Hematological	昆布	昆布	Laminaria japonica	clearing and heat-phlegm resolving medicinal
1237	Platelet-activating factor acetylhydrolase deficiency (3)	PLA2G7, PAFAH	601690	6p21.2-p12	Hematological	胖大海	胖大海	Sterculia lychnophora	clearing and heat-phlegm resolving medicinal
1242	Polycythemia vera, 263300 (3)	JAK2	147796	9p24	Hematological	川贝母	川貝母	Fritillaria cirrhosa D. Don	clearing and heat-phlegm resolving medicinal
1242	Polycythemia, benign familial, 263400 (3)	VHL	608537	3p26-p25	Hematological	前胡	前胡	Hogfennel Root	clearing and heat-phlegm resolving medicinal
1259	Prekallikrein deficiency (3)	KLKB1, KLK3	229000	4q35	Hematological	浙贝母	浙貝母	Fritillaria verticillata	clearing and heat-phlegm resolving medicinal
1273	Protein S deficiency (3)	PROS1	176880	3p11.1-q11.2	Hematological	蒺藜	蒺藜	Tribulus terrestris	liver-pacifying and wind-extinguishing medicinal
1296	Pyropoikilocytosis (3)	SPTA1	182860	1q21	Hematological	罗布麻	羅布麻	Apocynum venetum	liver-pacifying and wind-extinguishing medicinal
1326	Rh-mod syndrome (3)	RHAG, RH50A	180297	6p21.1-p11	Hematological	川贝母	川貝母	Fritillaria cirrhosa	clearing and heat-phlegm resolving medicinal
1327	Rh-negative blood type (3)	RHD	111680	1p36.2-p34	Hematological	梭砂贝母	梭砂貝母	Fritillaria delavayi	clearing and heat-phlegm resolving medicinal
1327	Rh-null disease, amorph type (3)	RHCE	111700	1p36.2-p34	Hematological	甘肃贝母	甘肅貝母	Fritillaria przewalskii Maxim. ex Batal.	clearing and heat-phlegm resolving medicinal
1366	Sea-blue histiocyte disease, 269600 (3)	APOE, AD2	107741	19q13.2	Hematological	暗紫贝母	暗紫貝母	Fritillaria unibracteata Hsiao et K.C. Hsiao	clearing and heat-phlegm resolving medicinal
1368	Sebastian syndrome, 605249 (3)	MYH9, MHA, FTNS, DFNA17	160775	22q11.2	Hematological	竹茹	竹茹	Bamboo Shavings	clearing and heat-phlegm resolving medicinal
1393	Sickle cell anemia (3)	HBB	141900	11p15.5	Hematological	青秆竹	青秆竹	Bambusa tuldoides	clearing and heat-phlegm resolving medicinal
1423	Spherocytosis, hereditary (3)	SLC4A1, AE1, EPB3	109270	17q21-q22	Hematological	淡竹	淡竹	Phyllostachys nigra	clearing and heat-phlegm resolving medicinal
1423	Spherocytosis, hereditary, Japanese type (3)	EPB42	177070	15q15	Hematological	浙贝母	浙貝母	Fritillaria thunbergii	clearing and heat-phlegm resolving medicinal
1423	Spherocytosis, recessive (3)	SPTA1	182860	1q21	Hematological	平贝母	平貝母	Fritillaria ussuriensis	clearing and heat-phlegm resolving medicinal
1423	Spherocytosis-1 (3)	SPTB	182870	14q22-q23.2	Hematological	伊犁贝母	伊犁貝母	Fritillaria pallidiflora	clearing and heat-phlegm resolving medicinal
1423	Spherocytosis-2 (3)	ANK1, SPH2	182900	8p11.2	Hematological	新疆贝母	新疆貝母	Fritillaria walujewii	clearing and heat-phlegm resolving medicinal
1486	Thalassemia due to Hb Lepore (3)	HBD	142000	11p15.5	Hematological	前胡	前胡	Angelica decursiva	clearing and heat-phlegm resolving medicinal
1486	Thalassemia, alpha- (3)	HBA2	141850	16pter-p13.3	Hematological	白花前胡	白花前胡	Peucedanum praeruptorum	clearing and heat-phlegm resolving medicinal
1486	Thalassemia, delta- (3)	HBD	142000	11p15.5	Hematological	紫花前胡	紫花前胡	Peucedanum decursivum	clearing and heat-phlegm resolving medicinal
1486	Thalassemia, Hispanic gamma-delta-beta (3)	LCRB	152424	11p15.5	Hematological	桔梗	桔梗	Platycodon grandiflorum	clearing and heat-phlegm resolving medicinal
1486	Thalassemia-beta, dominant inclusion-body, 603902 (3)	HBB	141900	11p15.5	Hematological	海藻	海藻	Seaweed	clearing and heat-phlegm resolving medicinal
1486	Thalassemias, alpha- (3)	HBA1	141800	16pter-p13.3	Hematological	海蒿子	海蒿子	Sargassum pallidum	clearing and heat-phlegm resolving medicinal
1486	Thalassemias, beta- (3)	HBB	141900	11p15.5	Hematological	羊栖菜	羊栖菜	Sargassum fusiforme	clearing and heat-phlegm resolving medicinal
1491	Thiamine-responsive megaloblastic anemia syndrome, 249270 (3)	SLC19A2, THTR1	603941	1q23.3	Hematological	瓜蒌	瓜蔞	Snakegourd Fruit	clearing and heat-phlegm resolving medicinal
1493	Thrombocythemia, essential, 187950 (3)	JAK2	147796	9p24	Hematological	植物瓜蒌	植物瓜蔞	Trichosanthes kirilowii	clearing and heat-phlegm resolving medicinal
1493	Thrombocythemia, essential, 187950 (3)	THPO, MGDF, MPLLG, TPO	600044	3q26.3-q27	Hematological	双边瓜蒌	雙邊瓜蔞	Trichosanthes rosthornii	clearing and heat-phlegm resolving medicinal
1494	Thrombocytopenia, congenital amegakaryocytic, 604498 (3)	MPL, TPOR, MPLV	159530	1p34	Hematological	昆布	昆布	Laminaria japonica	clearing and heat-phlegm resolving medicinal
1494	Thrombocytopenia, X-linked, 313900 (3)	WAS, IMD2, THC	300392	Xp11.23-p11.22	Hematological	胖大海	胖大海	Sterculia lychnophora	clearing and heat-phlegm resolving medicinal
1494	Thrombocytopenia, X-linked, intermittent, 313900 (3)	WAS, IMD2, THC	300392	Xp11.23-p11.22	Hematological	川贝母	川貝母	Fritillaria cirrhosa D. Don	clearing and heat-phlegm resolving medicinal
1494	Thrombocytopenia-2, 188000 (3)	FLJ14813, THC2	608221	10p12.1	Hematological	前胡	前胡	Hogfennel Root	clearing and heat-phlegm resolving medicinal
1494	Thromboembolism susceptibility due to factor V Leiden (3)	F5	227400	1q23	Hematological	浙贝母	浙貝母	Fritillaria verticillata	clearing and heat-phlegm resolving medicinal
1497	Thrombophilia due to factor V Liverpool (3)	F5	227400	1q23	Hematological	蒺藜	蒺藜	Tribulus terrestris	liver-pacifying and wind-extinguishing medicinal
1497	Thrombophilia due to heparin cofactor II deficiency (3)	HCF2, HC2, SERPIND1	142360	22q11	Hematological	罗布麻	羅布麻	Apocynum venetum	liver-pacifying and wind-extinguishing medicinal
1497	Thrombophilia due to HRG deficiency (3)	HRG	142640	3q27	Hematological	川贝母	川貝母	Fritillaria cirrhosa	clearing and heat-phlegm resolving medicinal
1497	Thrombophilia due to protein C deficiency (3)	PROC	176860	2q13-q14	Hematological	梭砂贝母	梭砂貝母	Fritillaria delavayi	clearing and heat-phlegm resolving medicinal
1497	Thrombophilia due to thrombomodulin defect (3)	THBD, THRM	188040	20p11.2	Hematological	甘肃贝母	甘肅貝母	Fritillaria przewalskii Maxim. ex Batal.	clearing and heat-phlegm resolving medicinal
1497	Thrombophilia, dysfibrinogenemic (3)	FGB	134830	4q28	Hematological	暗紫贝母	暗紫貝母	Fritillaria unibracteata Hsiao et K.C. Hsiao	clearing and heat-phlegm resolving medicinal
1497	Thrombophilia, dysfibrinogenemic (3)	FGG	134850	4q28	Hematological	竹茹	竹茹	Bamboo Shavings	clearing and heat-phlegm resolving medicinal
1497	Thrombosis, hyperhomocysteinemic (3)	CBS	236200	21q22.3	Hematological	青秆竹	青秆竹	Bambusa tuldoides	clearing and heat-phlegm resolving medicinal
1497	Thrombotic thrombocytopenic purpura, familial, 274150 (3)	ADAMTS13, VWFCP, TTP	604134	9q34	Hematological	淡竹	淡竹	Phyllostachys nigra	clearing and heat-phlegm resolving medicinal
1494	Thrombycytosis, susceptibility to, 187950 (3)	MPL, TPOR, MPLV	159530	1p34	Hematological	浙贝母	浙貝母	Fritillaria thunbergii	clearing and heat-phlegm resolving medicinal
1506	Thyroxine-binding globulin deficiency (3)	TBG	314200	Xq22.2	Hematological	平贝母	平貝母	Fritillaria ussuriensis	clearing and heat-phlegm resolving medicinal
1516	Transcobalamin II deficiency (3)	TCN2, TC2	275350	22q11.2-qter	Hematological	伊犁贝母	伊犁貝母	Fritillaria pallidiflora	clearing and heat-phlegm resolving medicinal
1565	Vitamin K-dependent clotting factors, combined deficiency of, 2, 607473 (3)	VKORC1, VKOR, VKCFD2, FLJ00289	608547	16p11.2	Hematological	新疆贝母	新疆貝母	Fritillaria walujewii	clearing and heat-phlegm resolving medicinal
1565	Vitamin K-dependent coagulation defect, 277450 (3)	GGCX	137167	2p12	Hematological	前胡	前胡	Angelica decursiva	clearing and heat-phlegm resolving medicinal
3572	von Willebrand disease (3)	VWF, F8VWF	193400	12p13.3	Hematological	白花前胡	白花前胡	Peucedanum praeruptorum	clearing and heat-phlegm resolving medicinal
1580	Warfarin resistance, 122700 (3)	VKORC1, VKOR, VKCFD2, FLJ00289	608547	16p11.2	Hematological	紫花前胡	紫花前胡	Peucedanum decursivum	clearing and heat-phlegm resolving medicinal
1580	Warfarin sensitivity (3)	F9, HEMB	306900	Xq27.1-q27.2	Hematological	桔梗	桔梗	Platycodon grandiflorum	clearing and heat-phlegm resolving medicinal
1580	Warfarin sensitivity, 122700 (3)	CYP2C9	601130	10q24	Hematological	海藻	海藻	Seaweed	clearing and heat-phlegm resolving medicinal
14	Abacavir hypersensitivity, susceptibility to (3)	HLA-B	142830	6p21.3	Immunological	海蒿子	海蒿子	Sargassum pallidum	clearing and heat-phlegm resolving medicinal
49	Adenosine deaminase deficiency, partial, 102700 (3)	ADA	608958	20q13.11	Immunological	羊栖菜	羊栖菜	Sargassum fusiforme	clearing and heat-phlegm resolving medicinal
70	AIDS, delayed/rapid progression to (3)	KIR3DL1, NKAT3, NKB1, AMB11, KIR3DS1	604946	19q13.4	Immunological	瓜蒌	瓜蔞	Snakegourd Fruit	clearing and heat-phlegm resolving medicinal
70	AIDS, rapid progression to, 609423 (3)	IFNG	147570	12q14	Immunological	植物瓜蒌	植物瓜蔞	Trichosanthes kirilowii	clearing and heat-phlegm resolving medicinal
70	AIDS, resistance to (3)	CXCL12, SDF1	600835	10q11.1	Immunological	双边瓜蒌	雙邊瓜蔞	Trichosanthes rosthornii	clearing and heat-phlegm resolving medicinal
83	Allergic rhinitis, susceptibility to, 607154 (3)	IL13, ALRH	147683	5q31	Immunological	昆布	昆布	Laminaria japonica	clearing and heat-phlegm resolving medicinal
114	Angioedema induced by ACE inhibitors, susceptibility to (3)	XPNPEP2	300145	Xq25	Immunological	胖大海	胖大海	Sterculia lychnophora	clearing and heat-phlegm resolving medicinal
114	Angioedema, hereditary, 106100 (3)	C1NH, HAE1, HAE2, SERPING1	606860	11q11-q13.1	Immunological	川贝母	川貝母	Fritillaria cirrhosa D. Don	clearing and heat-phlegm resolving medicinal
157	Ataxia-telangiectasia, 208900 (3)	ATM, ATA, AT1	607585	11q22.3	Immunological	前胡	前胡	Hogfennel Root	clearing and heat-phlegm resolving medicinal
157	Ataxia-telangiectasia-like disorder, 604391 (3)	MRE11A, MRE11, ATLD	600814	11q21	Immunological	浙贝母	浙貝母	Fritillaria verticillata	clearing and heat-phlegm resolving medicinal
164	Atopy, 147050 (3)	SPINK5, LEKTI	605010	5q32	Immunological	蒺藜	蒺藜	Tribulus terrestris	liver-pacifying and wind-extinguishing medicinal
164	Atopy, resistance to, 147050 (3)	HAVCR1, HAVCR	606518	5q33.2	Immunological	罗布麻	羅布麻	Apocynum venetum	liver-pacifying and wind-extinguishing medicinal
164	Atopy, susceptibility to (3)	IL4R, IL4RA	147781	16p12.1-p11.2	Immunological	川贝母	川貝母	Fritillaria cirrhosa	clearing and heat-phlegm resolving medicinal
164	Atopy, susceptibility to, 147050 (3)	PLA2G7, PAFAH	601690	6p21.2-p12	Immunological	梭砂贝母	梭砂貝母	Fritillaria delavayi	clearing and heat-phlegm resolving medicinal
164	Atopy, susceptibility to, 147050 (3)	SELP, GRMP	173610	1q23-q25	Immunological	甘肃贝母	甘肅貝母	Fritillaria przewalskii Maxim. ex Batal.	clearing and heat-phlegm resolving medicinal
174	Autoimmune lymphoproliferative syndrome, 601859 (3)	TNFRSF6, APT1, FAS, CD95, ALPS1A	134637	10q24.1	Immunological	暗紫贝母	暗紫貝母	Fritillaria unibracteata Hsiao et K.C. Hsiao	clearing and heat-phlegm resolving medicinal
174	Autoimmune lymphoproliferative syndrome, type IA, 601859 (3)	TNFRSF6, APT1, FAS, CD95, ALPS1A	134637	10q24.1	Immunological	竹茹	竹茹	Bamboo Shavings	clearing and heat-phlegm resolving medicinal
174	Autoimmune lymphoproliferative syndrome, type II, 603909 (3)	CASP10, MCH4, ALPS2	601762	2q33-q34	Immunological	青秆竹	青秆竹	Bambusa tuldoides	clearing and heat-phlegm resolving medicinal
174	Autoimmune lymphoproliferative syndrome, type IIB, 607271 (3)	CASP8, MCH5	601763	2q33-q34	Immunological	淡竹	淡竹	Phyllostachys nigra	clearing and heat-phlegm resolving medicinal
174	Autoimmune polyglandular disease, type I, 240300 (3)	AIRE, APECED	607358	21q22.3	Immunological	浙贝母	浙貝母	Fritillaria thunbergii	clearing and heat-phlegm resolving medicinal
184	Bare lymphocyte syndrome, type I, 604571 (3)	TAPBP, TPSN	601962	6p21.3	Immunological	平贝母	平貝母	Fritillaria ussuriensis	clearing and heat-phlegm resolving medicinal
184	Bare lymphocyte syndrome, type I, due to TAP2 deficiency, 604571 (3)	TAP2, ABCB3, PSF2, RING11	170261	6p21.3	Immunological	伊犁贝母	伊犁貝母	Fritillaria pallidiflora	clearing and heat-phlegm resolving medicinal
184	Bare lymphocyte syndrome, type II, complementation group A, 209920 (3)	MHC2TA, C2TA	600005	16p13	Immunological	新疆贝母	新疆貝母	Fritillaria walujewii	clearing and heat-phlegm resolving medicinal
184	Bare lymphocyte syndrome, type II, complementation group C, 209920 (3)	RFX5	601863	1q21.1-q21.3	Immunological	前胡	前胡	Angelica decursiva	clearing and heat-phlegm resolving medicinal
184	Bare lymphocyte syndrome, type II, complementation group D, 209920 (3)	RFXAP	601861	13q14	Immunological	白花前胡	白花前胡	Peucedanum praeruptorum	clearing and heat-phlegm resolving medicinal
184	Bare lymphocyte syndrome, type II, complementation group E, 209920 (3)	RFX5	601863	1q21.1-q21.3	Immunological	紫花前胡	紫花前胡	Peucedanum decursivum	clearing and heat-phlegm resolving medicinal
191	BCG infection, generalized familial (3)	IFNGR1	107470	6q23-q24	Immunological	桔梗	桔梗	Platycodon grandiflorum	clearing and heat-phlegm resolving medicinal
240	C1q deficiency, type A (3)	C1QA	120550	1p36.3-p34.1	Immunological	海藻	海藻	Seaweed	clearing and heat-phlegm resolving medicinal
240	C1q deficiency, type B (3)	C1QB	120570	1p36.3-p34.1	Immunological	海蒿子	海蒿子	Sargassum pallidum	clearing and heat-phlegm resolving medicinal
240	C1q deficiency, type C (3)	C1QG	120575	1p36.3-p34.1	Immunological	羊栖菜	羊栖菜	Sargassum fusiforme	clearing and heat-phlegm resolving medicinal
240	C1s deficiency, isolated (3)	C1S	120580	12p13	Immunological	瓜蒌	瓜蔞	Snakegourd Fruit	clearing and heat-phlegm resolving medicinal
240	C2 deficiency (3)	C2	217000	6p21.3	Immunological	植物瓜蒌	植物瓜蔞	Trichosanthes kirilowii	clearing and heat-phlegm resolving medicinal
240	C3 deficiency (3)	C3	120700	19p13.3-p13.2	Immunological	双边瓜蒌	雙邊瓜蔞	Trichosanthes rosthornii	clearing and heat-phlegm resolving medicinal
240	C3b inactivator deficiency (3)	IF	217030	4q25	Immunological	昆布	昆布	Laminaria japonica	clearing and heat-phlegm resolving medicinal
240	C4 deficiency (3)	C4A, C4S	120810	6p21.3	Immunological	胖大海	胖大海	Sterculia lychnophora	clearing and heat-phlegm resolving medicinal
240	C4 deficiency (3)	C4B, C4F	120820	6p21.3	Immunological	川贝母	川貝母	Fritillaria cirrhosa D. Don	clearing and heat-phlegm resolving medicinal
240	C6 deficiency (3)	C6	217050	5p13	Immunological	前胡	前胡	Hogfennel Root	clearing and heat-phlegm resolving medicinal
240	C7 deficiency (3)	C7	217070	5p13	Immunological	浙贝母	浙貝母	Fritillaria verticillata	clearing and heat-phlegm resolving medicinal
240	C8 deficiency, type II (3)	C8B	120960	1p32	Immunological	蒺藜	蒺藜	Tribulus terrestris	liver-pacifying and wind-extinguishing medicinal
240	C9 deficiency (3)	C9	120940	5p13	Immunological	罗布麻	羅布麻	Apocynum venetum	liver-pacifying and wind-extinguishing medicinal
240	C9 deficiency with dermatomyositis (3)	C9	120940	5p13	Immunological	川贝母	川貝母	Fritillaria cirrhosa	clearing and heat-phlegm resolving medicinal
283	CD59 deficiency (3)	CD59, MIC11	107271	11p13	Immunological	梭砂贝母	梭砂貝母	Fritillaria delavayi	clearing and heat-phlegm resolving medicinal
284	CD8 deficiency, familial, 608957 (3)	CD8A	186910	2p12	Immunological	甘肃贝母	甘肅貝母	Fritillaria przewalskii Maxim. ex Batal.	clearing and heat-phlegm resolving medicinal
327	Chronic granulomatous disease due to deficiency of NCF-1, 233700 (3)	NCF1	608512	7q11.23	Immunological	暗紫贝母	暗紫貝母	Fritillaria unibracteata Hsiao et K.C. Hsiao	clearing and heat-phlegm resolving medicinal
327	Chronic granulomatous disease due to deficiency of NCF-2, 233710 (3)	NCF2	608515	1q25	Immunological	竹茹	竹茹	Bamboo Shavings	clearing and heat-phlegm resolving medicinal
327	Chronic granulomatous disease, autosomal, due to deficiency of CYBA, 233690 (3)	CYBA	608508	16q24	Immunological	青秆竹	青秆竹	Bambusa tuldoides	clearing and heat-phlegm resolving medicinal
327	Chronic granulomatous disease, X-linked, 306400 (3)	CYBB, CGD	300481	Xp21.1	Immunological	淡竹	淡竹	Phyllostachys nigra	clearing and heat-phlegm resolving medicinal
2327	Chronic infections, due to opsonin defect (3)	MBL2, MBL, MBP1	154545	10q11.2-q21	Immunological	浙贝母	浙貝母	Fritillaria thunbergii	clearing and heat-phlegm resolving medicinal
344	Cold-induced autoinflammatory syndrome, familial, 120100 (3)	CIAS1, C1orf7, FCU, FCAS	606416	1q44	Immunological	平贝母	平貝母	Fritillaria ussuriensis	clearing and heat-phlegm resolving medicinal
4350	Combined C6/C7 deficiency (3)	C6	217050	5p13	Immunological	伊犁贝母	伊犁貝母	Fritillaria pallidiflora	clearing and heat-phlegm resolving medicinal
4350	Combined immunodeficiency, X-linked, moderate, 312863 (3)	IL2RG, SCIDX1, SCIDX, IMD4	308380	Xq13	Immunological	新疆贝母	新疆貝母	Fritillaria walujewii	clearing and heat-phlegm resolving medicinal
413	Dengue fever, protection against (3)	CD209, CDSIGN	604672	19p13.3	Immunological	前胡	前胡	Angelica decursiva	clearing and heat-phlegm resolving medicinal
481	Endotoxin hyporesponsiveness (3)	TLR4	603030	9q32-q33	Immunological	白花前胡	白花前胡	Peucedanum praeruptorum	clearing and heat-phlegm resolving medicinal
522	Familial Mediterranean fever, 249100 (3)	MEFV, MEF, FMF	608107	16p13	Immunological	紫花前胡	紫花前胡	Peucedanum decursivum	clearing and heat-phlegm resolving medicinal
623	Graft-versus-host disease, protection against (3)	IL10, CSIF	124092	1q31-q32	Immunological	桔梗	桔梗	Platycodon grandiflorum	clearing and heat-phlegm resolving medicinal
705	H. pylori infection, susceptibility to, 600263 (3)	IFNGR1	107470	6q23-q24	Immunological	海藻	海藻	Seaweed	clearing and heat-phlegm resolving medicinal
684	HIV infection, susceptibility/resistance to (3)	CMKBR2, CCR2	601267	3p21	Immunological	海蒿子	海蒿子	Sargassum pallidum	clearing and heat-phlegm resolving medicinal
684	HIV infection, susceptibility/resistance to (3)	CMKBR5, CCCKR5	601373	3p21	Immunological	羊栖菜	羊栖菜	Sargassum fusiforme	clearing and heat-phlegm resolving medicinal
684	HIV-1 disease, delayed progression of (3)	CCL5, SCYA5, D17S136E, TCP228	187011	17q11.2-q12	Immunological	瓜蒌	瓜蔞	Snakegourd Fruit	clearing and heat-phlegm resolving medicinal
684	HIV-1 disease, rapid progression of (3)	CCL5, SCYA5, D17S136E, TCP228	187011	17q11.2-q12	Immunological	植物瓜蒌	植物瓜蔞	Trichosanthes kirilowii	clearing and heat-phlegm resolving medicinal
684	HIV-1, susceptibility to (3)	IL10, CSIF	124092	1q31-q32	Immunological	双边瓜蒌	雙邊瓜蔞	Trichosanthes rosthornii	clearing and heat-phlegm resolving medicinal
728	Hyper-IgD syndrome, 260920 (3)	MVK, MVLK	251170	12q24	Immunological	昆布	昆布	Laminaria japonica	clearing and heat-phlegm resolving medicinal
771	Hypoglobulinemia and absent B cells (3)	BLNK, SLP65	604515	10q23.2	Immunological	胖大海	胖大海	Sterculia lychnophora	clearing and heat-phlegm resolving medicinal
795	ICOS deficiency, 607594 (3)	ICOS, AILIM	604558	2q33	Immunological	川贝母	川貝母	Fritillaria cirrhosa D. Don	clearing and heat-phlegm resolving medicinal
797	IgE levels QTL, 147050 (3)	PHF11, NYREN34	607796	13q14.1	Immunological	前胡	前胡	Hogfennel Root	clearing and heat-phlegm resolving medicinal
799	IgG receptor I, phagocytic, familial deficiency of (3)	FCGR1A, IGFR1, CD64	146760	1q21.2-q21.3	Immunological	浙贝母	浙貝母	Fritillaria verticillata	clearing and heat-phlegm resolving medicinal
798	IgG2 deficiency, selective (3)	IGHG2	147110	14q32.33	Immunological	蒺藜	蒺藜	Tribulus terrestris	liver-pacifying and wind-extinguishing medicinal
802	Immunodeficiency due to defect in CD3-epsilon (3)	CD3E	186830	11q23	Immunological	罗布麻	羅布麻	Apocynum venetum	liver-pacifying and wind-extinguishing medicinal
802	Immunodeficiency due to defect in CD3-gamma (3)	CD3G	186740	11q23	Immunological	青秆竹	青秆竹	Bambusa tuldoides	clearing and heat-phlegm resolving medicinal
802	Immunodeficiency with hyper IgM, type 4, 608106 (3)	UNG, DGU, HIGM4	191525	12q23-q24.1	Immunological	淡竹	淡竹	Phyllostachys nigra	clearing and heat-phlegm resolving medicinal
802	Immunodeficiency with hyper-IgM, type 2, 605258 (3)	AICDA, AID, HIGM2	605257	12p13	Immunological	浙贝母	浙貝母	Fritillaria thunbergii	clearing and heat-phlegm resolving medicinal
802	Immunodeficiency with hyper-IgM, type 3, 606843 (3)	TNFRSF5, CD40	109535	20q12-q13.2	Immunological	平贝母	平貝母	Fritillaria ussuriensis	clearing and heat-phlegm resolving medicinal
802	Immunodeficiency, X-linked, with hyper-IgM, 308230 (3)	TNFSF5, CD40LG, HIGM1, IGM	300386	Xq26	Immunological	伊犁贝母	伊犁貝母	Fritillaria pallidiflora	clearing and heat-phlegm resolving medicinal
804	Immunoglobulin A deficiency, 609529 (3)	TNFRSF14B, TACI	604907	17p11.2	Immunological	新疆贝母	新疆貝母	Fritillaria walujewii	clearing and heat-phlegm resolving medicinal
816	Interleukin-2 receptor, alpha chain, deficiency of (3)	IL2RA, IL2R	147730	10p15-p14	Immunological	前胡	前胡	Angelica decursiva	clearing and heat-phlegm resolving medicinal
821	IRAK4 deficiency, 607676 (3)	IRAK4, REN64	606883	12q12	Immunological	白花前胡	白花前胡	Peucedanum praeruptorum	clearing and heat-phlegm resolving medicinal
838	Kaposi sarcoma, susceptibility to, 148000 (3)	IL6, IFNB2, BSF2	147620	7p21	Immunological	紫花前胡	紫花前胡	Peucedanum decursivum	clearing and heat-phlegm resolving medicinal
839	Kappa light chain deficiency (3)	IGKC	147200	2p12	Immunological	桔梗	桔梗	Platycodon grandiflorum	clearing and heat-phlegm resolving medicinal
876	Legionaire disease, susceptibility to, 608556 (3)	TLR5, TIL3	603031	1q41-q42	Immunological	海藻	海藻	Seaweed	clearing and heat-phlegm resolving medicinal
882	Leprosy, susceptibility to, 607572 (3)	PRKN, PARK2, PDJ	602544	6q25.2-q27	Immunological	海蒿子	海蒿子	Sargassum pallidum	clearing and heat-phlegm resolving medicinal
889	Leukocyte adhesion deficiency, 116920 (3)	ITGB2, CD18, LCAMB, LAD	600065	21q22.3	Immunological	羊栖菜	羊栖菜	Sargassum fusiforme	clearing and heat-phlegm resolving medicinal
909	Listeria monocytogenes, susceptibility to (3)	CDH1, UVO	192090	16q22.1	Immunological	瓜蒌	瓜蔞	Snakegourd Fruit	clearing and heat-phlegm resolving medicinal
940	Malaria, cerebral, reduced risk of, 248310 (3)	CD36	173510	7q11.2	Immunological	植物瓜蒌	植物瓜蔞	Trichosanthes kirilowii	clearing and heat-phlegm resolving medicinal
940	Malaria, cerebral, susceptibility to (3)	ICAM1	147840	19p13.3-p13.2	Immunological	双边瓜蒌	雙邊瓜蔞	Trichosanthes rosthornii	clearing and heat-phlegm resolving medicinal
940	Malaria, cerebral, susceptibility to (3)	TNF, TNFA	191160	6p21.3	Immunological	昆布	昆布	Laminaria japonica	clearing and heat-phlegm resolving medicinal
940	Malaria, cerebral, susceptibility to, 248310 (3)	CD36	173510	7q11.2	Immunological	胖大海	胖大海	Sterculia lychnophora	clearing and heat-phlegm resolving medicinal
940	Malaria, resistance to, 248310 (3)	GYPC, GE, GPC	110750	2q14-q21	Immunological	川贝母	川貝母	Fritillaria cirrhosa D. Don	clearing and heat-phlegm resolving medicinal
940	Malaria, resistance to, 248310 (3)	NOS2A, NOS2	163730	17cen-q11.2	Immunological	前胡	前胡	Hogfennel Root	clearing and heat-phlegm resolving medicinal
956	MASP2 deficiency (3)	MASP2	605102	1p36.3-p36.2	Immunological	浙贝母	浙貝母	Fritillaria verticillata	clearing and heat-phlegm resolving medicinal
959	Mastocytosis with associated hematologic disorder (3)	KIT, PBT	164920	4q12	Immunological	蒺藜	蒺藜	Tribulus terrestris	liver-pacifying and wind-extinguishing medicinal
987	Meningococcal disease, susceptibility to (3)	MBL2, MBL, MBP1	154545	10q11.2-q21	Immunological	罗布麻	羅布麻	Apocynum venetum	liver-pacifying and wind-extinguishing medicinal
1006	MHC class II deficiency, complementation group B, 209920 (3)	RFXANK	603200	19p12	Immunological	川贝母	川貝母	Fritillaria cirrhosa	clearing and heat-phlegm resolving medicinal
1043	Mycobacterial and salmonella infections, susceptibility to, 209950 (3)	IL12RB1	601604	19p13.1	Immunological	梭砂贝母	梭砂貝母	Fritillaria delavayi	clearing and heat-phlegm resolving medicinal
1043	Mycobacterial infection, atypical, familial disseminated, 209950 (3)	IFNGR1	107470	6q23-q24	Immunological	甘肃贝母	甘肅貝母	Fritillaria przewalskii Maxim. ex Batal.	clearing and heat-phlegm resolving medicinal
1043	Mycobacterial infection, atypical, familial disseminated, 209950 (3)	IFNGR2, IFNGT1, IFGR2	147569	21q22.1-q22.2	Immunological	暗紫贝母	暗紫貝母	Fritillaria unibracteata Hsiao et K.C. Hsiao	clearing and heat-phlegm resolving medicinal
1043	Mycobacterial infection, atypical, familial disseminated, 209950 (3)	STAT1	600555	2q32.2-q32.3	Immunological	竹茹	竹茹	Bamboo Shavings	clearing and heat-phlegm resolving medicinal
1043	Mycobacterium tuberculosis, suceptibility to infection by, 607948 (3)	NRAMP1, NRAMP	600266	2q35	Immunological	青秆竹	青秆竹	Bambusa tuldoides	clearing and heat-phlegm resolving medicinal
1049	Myelokathexis, isolated (3)	CXCR4, D2S201E, NPY3R, WHIM	162643	2q21	Immunological	淡竹	淡竹	Phyllostachys nigra	clearing and heat-phlegm resolving medicinal
1051	Myeloperoxidase deficiency, 254600 (3)	MPO	606989	17q23.1	Immunological	浙贝母	浙貝母	Fritillaria thunbergii	clearing and heat-phlegm resolving medicinal
1102	Neutrophil immunodeficiency syndrome, 608203 (3)	RAC2	602049	22q12.3-q13.2	Immunological	平贝母	平貝母	Fritillaria ussuriensis	clearing and heat-phlegm resolving medicinal
1119	Norwalk virus infection, resistance to (3)	FUT2, SE	182100	19q13.3	Immunological	伊犁贝母	伊犁貝母	Fritillaria pallidiflora	clearing and heat-phlegm resolving medicinal
1122	Nucleoside phosphorylase deficiency, immunodeficiency due to (3)	NP	164050	14q13.1	Immunological	新疆贝母	新疆貝母	Fritillaria walujewii	clearing and heat-phlegm resolving medicinal
1141	Omenn syndrome, 603554 (3)	DCLRE1C, ARTEMIS, SCIDA	605988	10p	Immunological	前胡	前胡	Angelica decursiva	clearing and heat-phlegm resolving medicinal
1141	Omenn syndrome, 603554 (3)	RAG1	179615	11p13	Immunological	白花前胡	白花前胡	Peucedanum praeruptorum	clearing and heat-phlegm resolving medicinal
1141	Omenn syndrome, 603554 (3)	RAG2	179616	11p13	Immunological	紫花前胡	紫花前胡	Peucedanum decursivum	clearing and heat-phlegm resolving medicinal
1206	Periodic fever, familial, 142680 (3)	TNFRSF1A, TNFR1, TNFAR, FPF	191190	12p13.2	Immunological	桔梗	桔梗	Platycodon grandiflorum	clearing and heat-phlegm resolving medicinal
1270	Properdin deficiency, X-linked, 312060 (3)	PFC, PFD	300383	Xp11.4-p11.23	Immunological	海藻	海藻	Seaweed	clearing and heat-phlegm resolving medicinal
1304	Rapid progression to AIDS from HIV1 infection (3)	CX3CR1, GPR13, V28	601470	3pter-p21	Immunological	海蒿子	海蒿子	Sargassum pallidum	clearing and heat-phlegm resolving medicinal
1349	Sarcoidosis, early-onset, 181000 (3)	CARD15, NOD2, IBD1, CD, ACUG, PSORAS1	605956	16q12	Immunological	羊栖菜	羊栖菜	Sargassum fusiforme	clearing and heat-phlegm resolving medicinal
1349	Sarcoidosis, susceptibility to, 181000 (3)	BTNL2	606000	6p21.3	Immunological	瓜蒌	瓜蔞	Snakegourd Fruit	clearing and heat-phlegm resolving medicinal
1349	Sarcoidosis, susceptibility to, 181000 (3)	HLA-DR1B	142857	6p21.3	Immunological	植物瓜蒌	植物瓜蔞	Trichosanthes kirilowii	clearing and heat-phlegm resolving medicinal
1352	SARS, progression of (3)	ACE, DCP1, ACE1	106180	17q23	Immunological	双边瓜蒌	雙邊瓜蔞	Trichosanthes rosthornii	clearing and heat-phlegm resolving medicinal
1362	SCID, autosomal recessive, T-negative/B-positive type (3)	JAK3, JAKL	600173	19p13.1	Immunological	昆布	昆布	Laminaria japonica	clearing and heat-phlegm resolving medicinal
1372	Selective T-cell defect (3)	ZAP70, SRK, STD	176947	2q12	Immunological	胖大海	胖大海	Sterculia lychnophora	clearing and heat-phlegm resolving medicinal
1378	Sepsis, susceptibility to (3)	CASP12, CASP12P1	608633	11q22.3	Immunological	川贝母	川貝母	Fritillaria cirrhosa D. Don	clearing and heat-phlegm resolving medicinal
1378	Septic shock, susceptibility to (3)	TNF, TNFA	191160	6p21.3	Immunological	前胡	前胡	Hogfennel Root	clearing and heat-phlegm resolving medicinal
1383	Severe combined immunodeficiency due to ADA deficiency, 102700 (3)	ADA	608958	20q13.11	Immunological	浙贝母	浙貝母	Fritillaria verticillata	clearing and heat-phlegm resolving medicinal
1383	Severe combined immunodeficiency due to PTPRC deficiency (3)	PTPRC, CD45, LCA	151460	1q31-q32	Immunological	蒺藜	蒺藜	Tribulus terrestris	liver-pacifying and wind-extinguishing medicinal
1383	Severe combined immunodeficiency, Athabascan type, 602450 (3)	DCLRE1C, ARTEMIS, SCIDA	605988	10p	Immunological	罗布麻	羅布麻	Apocynum venetum	liver-pacifying and wind-extinguishing medicinal
1383	Severe combined immunodeficiency, B cell-negative, 601457 (3)	RAG1	179615	11p13	Immunological	川贝母	川貝母	Fritillaria cirrhosa	clearing and heat-phlegm resolving medicinal
1383	Severe combined immunodeficiency, B cell-negative, 601457 (3)	RAG2	179616	11p13	Immunological	梭砂贝母	梭砂貝母	Fritillaria delavayi	clearing and heat-phlegm resolving medicinal
1383	Severe combined immunodeficiency, T-cell negative, B-cell/natural killer cell-positive type, 600802 (3)	IL7R	146661	5p13	Immunological	甘肃贝母	甘肅貝母	Fritillaria przewalskii Maxim. ex Batal.	clearing and heat-phlegm resolving medicinal
1383	Severe combined immunodeficiency, T-negative/B-positive type, 600802 (3)	CD3D, T3D	186790	11q23	Immunological	暗紫贝母	暗紫貝母	Fritillaria unibracteata Hsiao et K.C. Hsiao	clearing and heat-phlegm resolving medicinal
1383	Severe combined immunodeficiency, X-linked, 300400 (3)	IL2RG, SCIDX1, SCIDX, IMD4	308380	Xq13	Immunological	竹茹	竹茹	Bamboo Shavings	clearing and heat-phlegm resolving medicinal
3419	Specific granule deficiency, 245480 (3)	CEBPE, CRP1	600749	14q11.2	Immunological	青秆竹	青秆竹	Bambusa tuldoides	clearing and heat-phlegm resolving medicinal
1471	Systemic lupus erythematosus, susceptibility to, 152700 (3)	DNASE1, DNL1	125505	16p13.3	Immunological	淡竹	淡竹	Phyllostachys nigra	clearing and heat-phlegm resolving medicinal
1471	Systemic lupus erythematosus, susceptibility to, 152700 (3)	PTPN8, PEP, PTPN22, LYP	600716	1p13	Immunological	浙贝母	浙貝母	Fritillaria thunbergii	clearing and heat-phlegm resolving medicinal
1471	Systemic lupus erythematosus, susceptibility to, 2, 605218, 152700 (3)	PDCD1, SLEB2	600244	2q37.3	Immunological	平贝母	平貝母	Fritillaria ussuriensis	clearing and heat-phlegm resolving medicinal
1471	Systemic lupus erythematosus, susceptibility, 152700 (3)	TNFSF6, APT1LG1, FASL	134638	1q23	Immunological	伊犁贝母	伊犁貝母	Fritillaria pallidiflora	clearing and heat-phlegm resolving medicinal
3478	T-cell immunodeficiency, congenital alopecia, and nail dystrophy (3)	WHN	600838	17q11-q12	Immunological	新疆贝母	新疆貝母	Fritillaria walujewii	clearing and heat-phlegm resolving medicinal
1562	Viral infection, susceptibility to (3)	OAS1, OIAS	164350	12q24.2	Immunological	前胡	前胡	Angelica decursiva	clearing and heat-phlegm resolving medicinal
1562	Viral infections, recurrent (3)	FCGR3A, CD16, IGFR3	146740	1q23	Immunological	白花前胡	白花前胡	Peucedanum praeruptorum	clearing and heat-phlegm resolving medicinal
1583	Wegener-like granulomatosis (3)	TAP2, ABCB3, PSF2, RING11	170261	6p21.3	Immunological	紫花前胡	紫花前胡	Peucedanum decursivum	clearing and heat-phlegm resolving medicinal
1591	WHIM syndrome, 193670 (3)	CXCR4, D2S201E, NPY3R, WHIM	162643	2q21	Immunological	桔梗	桔梗	Platycodon grandiflorum	clearing and heat-phlegm resolving medicinal
1598	Wiskott-Aldrich syndrome, 301000 (3)	WAS, IMD2, THC	300392	Xp11.23-p11.22	Immunological	海藻	海藻	Seaweed	clearing and heat-phlegm resolving medicinal
1611	XLA and isolated growth hormone deficiency, 307200 (3)	BTK, AGMX1, IMD1, XLA, AT	300300	Xq21.3-q22	Immunological	海蒿子	海蒿子	Sargassum pallidum	clearing and heat-phlegm resolving medicinal
1613	Yellow nail syndrome, 153300 (3)	FOXC2, FKHL14, MFH1	602402	16q24.3	Immunological	羊栖菜	羊栖菜	Sargassum fusiforme	clearing and heat-phlegm resolving medicinal
3	2-methyl-3-hydroxybutyryl-CoA dehydrogenase deficiency, 300438 (3)	HADH2, ERAB	300256	Xp11.2	Metabolic	夏枯草	夏枯草	Prunella vulgaris	heat-clearing and fire-purging medicinal
4	2-methylbutyrylglycinuria (3)	ACADSB	600301	10q25-q26	Metabolic	栀子	梔子	Gardenia florida	heat-clearing and fire-purging medicinal
5	3-beta-hydroxysteroid dehydrogenase, type II, deficiency (3)	HSD3B2	201810	1p13.1	Metabolic	决明子	決明子	Cassia Seed	heat-clearing and fire-purging medicinal
6	3-hydroxyacyl-CoA dehydrogenase deficiency, 609609 (3)	HADHSC, SCHAD	601609	4q22-q26	Metabolic	决明	決明	Cassia obtusifolia L.	heat-clearing and fire-purging medicinal
7	3-Methylcrotonyl-CoA carboxylase 1 deficiency, 210200 (3)	MCCC1, MCCA	609010	3q25-q27	Metabolic	小决明	小決明	Cassia tora L.	heat-clearing and fire-purging medicinal
7	3-Methylcrotonyl-CoA carboxylase 2 deficiency, 210210 (3)	MCCC2, MCCB	609014	5q12-q13	Metabolic	芦根	蘆根	Phragmites communis Trin	heat-clearing and fire-purging medicinal
8	3-methylglutaconic aciduria, type I, 250950 (3)	AUH	600529	Chr.9	Metabolic	谷精草	谷精草	Eriocaulon buergerianum	heat-clearing and fire-purging medicinal
9	3-methylglutaconicaciduria, type III, 258501 (3)	OPA3, MGA3	606580	19q13.2-q13.3	Metabolic	密蒙花	密蒙花	Buddleja officinalis	heat-clearing and fire-purging medicinal
12	6-mercaptopurine sensitivity (3)	TPMT	187680	6p22.3	Metabolic	青葙子	青葙子	Celosia argentea	heat-clearing and fire-purging medicinal
17	Abetalipoproteinemia (3)	APOB, FLDB	107730	2p24	Metabolic	知母	知母	Anemarrhena asphodeloides	heat-clearing and fire-purging medicinal
17	Abetalipoproteinemia, 200100 (3)	MTP	157147	4q22-q24	Metabolic	鸭跖草	鴨跖草	Commelina communis	heat-clearing and fire-purging medicinal
44	Acyl-CoA dehydrogenase, long chain, deficiency of (3)	ACADL, LCAD	201460	2q34-q35	Metabolic	天花粉	天花粉	Trichosanthes kirilowii Maxim.	heat-clearing and fire-purging medicinal
44	Acyl-CoA dehydrogenase, medium chain, deficiency of, 201450 (3)	ACADM, MCAD	607008	1p31	Metabolic	决明子	決明子	Cassia tora L	heat-clearing and fire-purging medicinal
44	Acyl-CoA dehydrogenase, short-chain, deficiency of, 201470 (3)	ACADS, SCAD	606885	12q22-qter	Metabolic	栀子	梔子	Gardenia jasminoides	heat-clearing and fire-purging medicinal
50	Adenylosuccinase deficiency, 103050 (3)	ADSL	608222	22q13.1	Metabolic	淡竹叶	淡竹葉	Lophatherum gracile Brongn.	heat-clearing and fire-purging medicinal
57	Adrenomyeloneuropathy, 300100 (3)	ABCD1, ALD, AMN	300371	Xq28	Metabolic	鸭跖草	鴨跖草	Commelina communis L.	heat-clearing and fire-purging medicinal
64	AGAT deficiency (3)	GATM, AGAT	602360	15q15.3	Metabolic	黄芩	黃芩	Scutellaria baicalensis	heat-clearing and dampness-drying medicinal
69	AICA-ribosiduria due to ATIC deficiency, 608688 (3)	ATIC, PURH, AICAR	601731	2q35	Metabolic	苦蔘	苦蔘	Sophora flavescens	heat-clearing and dampness-drying medicinal
2074	Alcohol intolerance, acute (3)	ALDH2	100650	12q24.2	Metabolic	黄连	黃連	Coptis chinensis	heat-clearing and dampness-drying medicinal
76	Aldolase A deficiency (3)	ALDOA	103850	16q22-q24	Metabolic	白鲜皮	白鮮皮	Dictamnus dasycarpus	heat-clearing and dampness-drying medicinal
80	Alkaptonuria, 203500 (3)	HGD, AKU	607474	3q21-q23	Metabolic	黄柏	黃柏	Phellodendron amurense	heat-clearing and dampness-drying medicinal
90	Alpha-methylacetoacetic aciduria, 203750 (3)	ACAT1	607809	11q22.3-q23.1	Metabolic	秦皮	秦皮	Fraxinus rhinchophylla	heat-clearing and dampness-drying medicinal
91	Alpha-methylacyl-CoA racemase deficiency (3)	AMACR	604489	5p13.2-q11.1	Metabolic	龙胆草	龍膽草	Gentiana scabra	heat-clearing and dampness-drying medicinal
136	ApoA-I and apoC-III deficiency, combined (3)	APOA1	107680	11q23	Metabolic	虎杖	虎杖	Polygonum cuspidatum	heat-clearing and dampness-drying medicinal
136	Apolipoprotein A-II deficiency (3)	APOA2	107670	1q21-q23	Metabolic	委陵菜	委陵菜	Potentilla chinensis	heat-clearing and dampness-drying medicinal
136	Apolipoprotein C3 deficiency (3)	APOC3	107720	11q23	Metabolic	积雪草	積雪草	Centella asiatica	heat-clearing and dampness-drying medicinal
136	Apolipoprotein H deficiency (3)	APOH	138700	17q23-qter	Metabolic	黄柏	黃柏	Phellodendron chinense	heat-clearing and dampness-drying medicinal
140	Argininemia, 207800 (3)	ARG1	608313	6q23	Metabolic	板蓝根	板藍根	Isatis indigotica	heat-clearing and detoxicating medicinal
140	Argininosuccinic aciduria, 207900 (3)	ASL	608310	7cen-q11.2	Metabolic	白头翁	白頭翁	Pulsatilla chinensis	heat-clearing and detoxicating medicinal
142	Aromatase deficiency (3)	CYP19A1, CYP19, ARO	107910	15q21.1	Metabolic	金荞麦	金蕎麥	Fagopyrum dibotrys	heat-clearing and detoxicating medicinal
143	Aromatic L-amino acid decarboxylase deficiency, 608643 (3)	DDC	107930	7p11	Metabolic	马勃	馬勃	Carpophorum Calvatial Lilacinae	heat-clearing and detoxicating medicinal
150	Aspartylglucosaminuria (3)	AGA	208400	4q32-q33	Metabolic	马勃	馬勃	Lasiosphaera fenzlii Reich.	heat-clearing and detoxicating medicinal
199	Beta-ureidopropionase deficiency (3)	UPB1, BUP1	606673	22q11.2	Metabolic	白花蛇舌草	白花蛇舌草	Oldenlandia diffusa	heat-clearing and detoxicating medicinal
203	Biotinidase deficiency, 253260 (3)	BTD	609019	3p25	Metabolic	金银花	金銀花	Lonicera confuse	heat-clearing and detoxicating medicinal
258	Canavan disease, 271900 (3)	ASPA	608034	17pter-p13	Metabolic	金银花	金銀花	Lonicera confuse	heat-clearing and detoxicating medicinal
262	Carbamoylphosphate synthetase I deficiency, 237300 (3)	CPS1	608307	2q35	Metabolic	金银花	金銀花	Lonicera dasystyla	heat-clearing and detoxicating medicinal
263	Carbohydrate-deficient glycoprotein syndrome, type I, 212065 (3)	PMM2, CDG1	601785	16p13.3-p13.2	Metabolic	金银花	金銀花	Lonicera hypoglauca	heat-clearing and detoxicating medicinal
263	Carbohydrate-deficient glycoprotein syndrome, type Ib, 602579 (3)	MPI, PMI1	154550	15q22-qter	Metabolic	金银花	金銀花	Lonicera japonica	heat-clearing and detoxicating medicinal
263	Carbohydrate-deficient glycoprotein syndrome, type II, 212066 (3)	MGAT2, CDGS2	602616	14q21	Metabolic	土茯苓	土茯苓	Smilax glabra Roxb	heat-clearing and detoxicating medicinal
272	Carnitine deficiency, systemic primary, 212140 (3)	SLC22A5, OCTN2, CDSP, SCD	603377	5q31.1	Metabolic	红藤	紅藤	Sargentodoxa cuneata	heat-clearing and detoxicating medicinal
271	Carnitine-acylcarnitine translocase deficiency (3)	SLC25A20, CACT, CAC	212138	3p21.31	Metabolic	穿心莲	穿心蓮	Andrographis paniculata	heat-clearing and detoxicating medicinal
293	Cerebrotendinous xanthomatosis, 213700 (3)	CYP27A1, CYP27, CTX	606530	2q33-qter	Metabolic	拳蔘	拳蔘	Polygonum bistorta	heat-clearing and detoxicating medicinal
299	CETP deficiency, 607322 (3)	CETP	118470	16q21	Metabolic	山慈姑	山慈姑	Appendiculate cremastra pseudobulb or Common pleione pseudobulb	heat-clearing and detoxicating medicinal
300	Chanarin-Dorfman syndrome, 275630 (3)	ABHD5, CGI58, IECN2, NCIE2	604780	3p21	Metabolic	山慈姑	山慈姑	Cremastra appendiculata	heat-clearing and detoxicating medicinal
307	Chitotriosidase deficiency (3)	CHIT	600031	1q31-q32	Metabolic	山慈姑	山慈姑	Pleione bulbocodioides	heat-clearing and detoxicating medicinal
313	Cholesteryl ester storage disease (3)	LIPA	278000	10q24-q25	Metabolic	山慈姑	山慈姑	Pleione yunnanensis	heat-clearing and detoxicating medicinal
329	Chylomicronemia syndrome, familial (3)	LPL, LIPD	238600	8p22	Metabolic	大青叶	大青葉	Isatis indigotica	heat-clearing and detoxicating medicinal
335	Citrullinemia, 215700 (3)	ASS	603470	9q34	Metabolic	射干	射干	Belamcanda chinensis (L.) DC.	heat-clearing and detoxicating medicinal
335	Citrullinemia, adult-onset type II, 603471 (3)	SLC25A13, CTLN2	603859	7q21.3	Metabolic	紫花地丁	紫花地丁	Viola yedoensis	heat-clearing and detoxicating medicinal
335	Citrullinemia, type II, neonatal-onset, 605814 (3)	SLC25A13, CTLN2	603859	7q21.3	Metabolic	马齿苋	馬齒莧	Portulaca oleracea	heat-clearing and detoxicating medicinal
340	Codeine sensitivity (3)	CYP2D@, CYP2D, P450C2D	124030	22q13.1	Metabolic	熊胆	熊膽	Selenarctos thibetanus G. Cuvier	heat-clearing and detoxicating medicinal
2350	Combined hyperlipemia, familial (3)	LPL, LIPD	238600	8p22	Metabolic	鱼腥草	魚腥草	Houttuynia cordata	heat-clearing and detoxicating medicinal
8350	Combined SAP deficiency (3)	PSAP, SAP1	176801	10q22.1	Metabolic	山豆根	山豆根	Sophora subprostrata	heat-clearing and detoxicating medicinal
354	Congenital disorder of glycosylation, type Ic, 603147 (3)	ALG6	604566	1p22.3	Metabolic	青黛	青黛	Indigo Naturalis	heat-clearing and detoxicating medicinal
354	Congenital disorder of glycosylation, type Id, 601110 (3)	ALG3, NOT56L, CDGS4	608750	3q27	Metabolic	青黛	青黛	Isatis indigotica	heat-clearing and detoxicating medicinal
354	Congenital disorder of glycosylation, type Ie, 608799 (3)	DPM1, MPDS, CDGIE	603503	20q13.13	Metabolic	青黛	青黛	Polygonum tinctorium	heat-clearing and detoxicating medicinal
354	Congenital disorder of glycosylation, type If, 609180 (3)	MPDU1, SL15, CDGIF	604041	17p13.1-p12	Metabolic	鸦胆子	鴉膽子	Brucea javanica	heat-clearing and detoxicating medicinal
354	Congenital disorder of glycosylation, type Ig, 607143 (3)	ALG12	607144	Chr.22	Metabolic	贯众	貫眾	Dryopteris Crassirhizoma	heat-clearing and detoxicating medicinal
354	Congenital disorder of glycosylation, type Ih, 608104 (3)	ALG8	608103	11pter-p15.5	Metabolic	漏芦	漏蘆	Rhaponticum uniflorum	heat-clearing and detoxicating medicinal
354	Congenital disorder of glycosylation, type Ii, 607906 (3)	ALG2, CDGII	607905	9q22	Metabolic	败醬草	敗醬草	Herba Patriniae	heat-clearing and detoxicating medicinal
354	Congenital disorder of glycosylation, type II, 608776 (3)	DIBD1, ALG9	606941	11q23	Metabolic	白花败醬	白花敗醬	Patrinia villosa	heat-clearing and detoxicating medicinal
354	Congenital disorder of glycosylation, type IIc, 266265 (3)	SLC35C1, FUCT1	605881	11p11.2	Metabolic	黄花败醬	黃花敗醬	Patrinia scabiosaefolia	heat-clearing and detoxicating medicinal
354	Congenital disorder of glycosylation, type IId, 607091 (3)	B4GALT1, GGTB2, GT1, GTB	137060	9p13	Metabolic	蒲公英	蒲公英	Dandelion	heat-clearing and detoxicating medicinal
354	Congenital disorder of glycosylation, type IIe, 608779 (3)	COG7, CDG2E	606978	16p	Metabolic	植物蒲公英	植物蒲公英	Taraxacum mongolicum	heat-clearing and detoxicating medicinal
354	Congenital disorder of glycosylation, type Ij, 608093 (3)	DPAGT2, DGPT	191350	11q23.3	Metabolic	碱地蒲公英	鹼地蒲公英	Taraxacum sinicum	heat-clearing and detoxicating medicinal
354	Congenital disorder of glycosylation, type Ik, 608540 (3)	ALG1, HMAT1, HMT1	605907	16p13.3	Metabolic	连翘	連翹	Forsythia suspense	heat-clearing and detoxicating medicinal
361	Coproporphyria (3)	CPO	121300	3q12	Metabolic	地锦草	地錦草	Creeping Euphorbia	heat-clearing and detoxicating medicinal
368	Cortisone reductase deficiency, 604931 (3)	GDH	138090	1pter-p36.13	Metabolic	植物地锦	植物地錦	Euphorbia humifusa	heat-clearing and detoxicating medicinal
368	Cortisone reductase deficiency, 604931 (3)	HSD11B1, HSD11, HSD11L	600713	1q32-q41	Metabolic	半边莲	半邊蓮	Lobelia chinensis	heat-clearing and detoxicating medicinal
374	CPT deficiency, hepatic, type IA, 255120 (3)	CPT1A	600528	11q13	Metabolic	白蘝	白蘝	Ampelopsis japonica	heat-clearing and detoxicating medicinal
374	CPT deficiency, hepatic, type II, 600649 (3)	CPT2	600650	1p32	Metabolic	土茯苓	土茯苓	Smilax glabra Roxb.	heat-clearing and detoxicating medicinal
374	CPT II deficiency, lethal neonatal, 608836 (3)	CPT2	600650	1p32	Metabolic	大青叶	大青葉	lsatis indigotica	heat-clearing and detoxicating medicinal
385	Creatine phosphokinase, elevated serum, 123320 (3)	CAV3, LGMD1C	601253	3p25	Metabolic	山豆根	山豆根	Sophora tonkinensis	heat-clearing and detoxicating medicinal
385	Creatine phosphokinase, elevated serum, 123320 (3)	CAV3, LGMD1C	601253	3p25	Metabolic	四季青	四季青	Ilex chinensis Sims	heat-clearing and detoxicating medicinal
398	Cystathioninuria, 219500 (3)	CTH	607657	1p31.1	Metabolic	板蓝根	板藍根	lsatis indigotica	heat-clearing and detoxicating medicinal
402	D-2-hydroxyglutaric aciduria, 600721 (3)	D2HGD	609186	2p25.3	Metabolic	蚤休	蚤休	Paris polyphylla Smith	heat-clearing and detoxicating medicinal
405	D-bifunctional protein deficiency, 261515 (3)	HSD17B4	601860	5q2	Metabolic	熊胆	熊膽	Ursus arctos L.	heat-clearing and detoxicating medicinal
407	Debrisoquine sensitivity (3)	CYP2D@, CYP2D, P450C2D	124030	22q13.1	Metabolic	熊胆	熊膽	Ursus arctos Linnaeus and Selenarctos thibetanus	heat-clearing and detoxicating medicinal
426	Desmosterolosis, 602398 (3)	DHCR24, KIAA0018	606418	1p33-p31.1	Metabolic	蒲公英	蒲公英	Taraxacum mongolicum Hand.-Mazz.	heat-clearing and detoxicating medicinal
433	Dihydropyrimidinuria (3)	DPYS, DHP	222748	8q22	Metabolic	板蓝根	板藍根	Isatis indigotica	heat-clearing and detoxicating medicinal
435	Dimethylglycine dehydrogenase deficiency, 605850 (3)	DMGDH, DMGDHD	605849	5q12.2-q12.3	Metabolic	白头翁	白頭翁	Pulsatilla chinensis	heat-clearing and detoxicating medicinal
438	Disordered steroidogenesis, isolated (3)	POR	124015	7q11.2	Metabolic	金荞麦	金蕎麥	Fagopyrum dibotrys	heat-clearing and detoxicating medicinal
440	DNA topoisomerase I, camptothecin-resistant (3)	TOP1	126420	20q12-q13.1	Metabolic	马勃	馬勃	Carpophorum Calvatial Lilacinae	heat-clearing and detoxicating medicinal
440	DNA topoisomerase II, resistance to inhibition of, by amsacrine (3)	TOP2A, TOP2	126430	17q21-q22	Metabolic	马勃	馬勃	Lasiosphaera fenzlii Reich.	heat-clearing and detoxicating medicinal
441	Dopamine beta-hydroxylase deficiency, 223360 (3)	DBH	609312	9q34	Metabolic	白花蛇舌草	白花蛇舌草	Oldenlandia diffusa	heat-clearing and detoxicating medicinal
441	Dopamine-beta-hydroxylase activity levels, plasma (3)	DBH	609312	9q34	Metabolic	金银花	金銀花	Lonicera confuse	heat-clearing and detoxicating medicinal
450	Dubin-Johnson syndrome, 237500 (3)	ABCC2, CMOAT	601107	10q24	Metabolic	金银花	金銀花	Lonicera confuse	heat-clearing and detoxicating medicinal
485	Enolase-beta deficiency (3)	ENO3	131370	17pter-p12	Metabolic	金银花	金銀花	Lonicera dasystyla	heat-clearing and detoxicating medicinal
510	Ethylmalonic encephalopathy, 602473 (3)	ETHE1, HSCO, D83198	608451	19q13.32	Metabolic	金银花	金銀花	Lonicera hypoglauca	heat-clearing and detoxicating medicinal
512	Exertional myoglobinuria due to deficiency of LDH-A (3)	LDHA, LDH1	150000	11p15.4	Metabolic	金银花	金銀花	Lonicera japonica	heat-clearing and detoxicating medicinal
518	Fabry disease (3)	GLA	301500	Xq22	Metabolic	土茯苓	土茯苓	Smilax glabra Roxb	heat-clearing and detoxicating medicinal
524	Fanconi-Bickel syndrome, 227810 (3)	SLC2A2, GLUT2	138160	3q26.1-q26.3	Metabolic	红藤	紅藤	Sargentodoxa cuneata	heat-clearing and detoxicating medicinal
526	Farber lipogranulomatosis (3)	ASAH, AC	228000	8p22-p21.3	Metabolic	穿心莲	穿心蓮	Andrographis paniculata	heat-clearing and detoxicating medicinal
527	Fatty liver, acute, of pregnancy (3)	HADHA, MTPA	600890	2p23	Metabolic	拳蔘	拳蔘	Polygonum bistorta	heat-clearing and detoxicating medicinal
528	Favism (3)	G6PD, G6PD1	305900	Xq28	Metabolic	山慈姑	山慈姑	Appendiculate cremastra pseudobulb or Common pleione pseudobulb	heat-clearing and detoxicating medicinal
540	Fish-eye disease, 136120 (3)	LCAT	606967	16q22.1	Metabolic	山慈姑	山慈姑	Cremastra appendiculata	heat-clearing and detoxicating medicinal
541	Fish-odor syndrome, 602079 (3)	FMO3	136132	1q23-q25	Metabolic	山慈姑	山慈姑	Pleione bulbocodioides	heat-clearing and detoxicating medicinal
544	Fluorouracil toxicity, sensitivity to (3)	DPYD, DPD	274270	1p22	Metabolic	山慈姑	山慈姑	Pleione yunnanensis	heat-clearing and detoxicating medicinal
556	Fructose intolerance (3)	ALDOB	229600	9q22.3	Metabolic	大青叶	大青葉	Isatis indigotica	heat-clearing and detoxicating medicinal
555	Fructose-bisphosphatase deficiency (3)	FBP1	229700	9q22.2-q22.3	Metabolic	射干	射干	Belamcanda chinensis (L.) DC.	heat-clearing and detoxicating medicinal
557	Fructosuria (3)	KHK	229800	2p23.3-p23.2	Metabolic	紫花地丁	紫花地丁	Viola yedoensis	heat-clearing and detoxicating medicinal
559	Fucosidosis (3)	FUCA1	230000	1p34	Metabolic	马齿苋	馬齒莧	Portulaca oleracea	heat-clearing and detoxicating medicinal
560	Fucosyltransferase-6 deficiency (3)	FUT6	136836	19p13.3	Metabolic	熊胆	熊膽	Selenarctos thibetanus G. Cuvier	heat-clearing and detoxicating medicinal
561	Fumarase deficiency, 606812 (3)	FH	136850	1q42.1	Metabolic	鱼腥草	魚腥草	Houttuynia cordata	heat-clearing and detoxicating medicinal
563	G6PD deficiency (3)	G6PD, G6PD1	305900	Xq28	Metabolic	山豆根	山豆根	Sophora subprostrata	heat-clearing and detoxicating medicinal
564	GABA-transaminase deficiency (3)	ABAT, GABAT	137150	16p13.3	Metabolic	青黛	青黛	Indigo Naturalis	heat-clearing and detoxicating medicinal
565	Galactokinase deficiency with cataracts, 230200 (3)	GALK1	604313	17q24	Metabolic	青黛	青黛	Isatis indigotica	heat-clearing and detoxicating medicinal
566	Galactose epimerase deficiency, 230350 (3)	GALE	606953	1p36-p35	Metabolic	青黛	青黛	Polygonum tinctorium	heat-clearing and detoxicating medicinal
567	Galactosemia, 230400 (3)	GALT	606999	9p13	Metabolic	鸦胆子	鴉膽子	Brucea javanica	heat-clearing and detoxicating medicinal
568	Galactosialidosis (3)	PPGB, GSL, NGBE, GLB2, CTSA	256540	20q13.1	Metabolic	贯众	貫眾	Dryopteris Crassirhizoma	heat-clearing and detoxicating medicinal
570	GAMT deficiency (3)	GAMT	601240	19p13.3	Metabolic	漏芦	漏蘆	Rhaponticum uniflorum	heat-clearing and detoxicating medicinal
575	Gaucher disease with cardiovascular calcification, 231005 (3)	GBA	606463	1q21	Metabolic	败醬草	敗醬草	Herba Patriniae	heat-clearing and detoxicating medicinal
575	Gaucher disease, 230800 (3)	GBA	606463	1q21	Metabolic	白花败醬	白花敗醬	Patrinia villosa	heat-clearing and detoxicating medicinal
575	Gaucher disease, variant form (3)	PSAP, SAP1	176801	10q22.1	Metabolic	黄花败醬	黃花敗醬	Patrinia scabiosaefolia	heat-clearing and detoxicating medicinal
586	Gilbert syndrome, 143500 (3)	UGT1A1, UGT1, GNT1	191740	2q37	Metabolic	蒲公英	蒲公英	Dandelion	heat-clearing and detoxicating medicinal
600	Glucose transport defect, blood-brain barrier, 606777 (3)	SLC2A1, GLUT1	138140	1p35-p31.3	Metabolic	植物蒲公英	植物蒲公英	Taraxacum mongolicum	heat-clearing and detoxicating medicinal
599	Glucose/galactose malabsorption, 606824 (3)	SLC5A1, SGLT1	182380	22q13.1	Metabolic	碱地蒲公英	鹼地蒲公英	Taraxacum sinicum	heat-clearing and detoxicating medicinal
601	Glucosidase I deficiency, 606056 (3)	GCS1	601336	2p13-p12	Metabolic	连翘	連翹	Forsythia suspense	heat-clearing and detoxicating medicinal
602	Glutamate formiminotransferase deficiency, 229100 (3)	FTCD	606806	21q22.3	Metabolic	地锦草	地錦草	Creeping Euphorbia	heat-clearing and detoxicating medicinal
603	Glutaricaciduria, type I, 231670 (3)	GCDH	608801	19p13.2	Metabolic	植物地锦	植物地錦	Euphorbia humifusa	heat-clearing and detoxicating medicinal
603	Glutaricaciduria, type IIA, 231680 (3)	ETFA, GA2, MADD	608053	15q23-q25	Metabolic	半边莲	半邊蓮	Lobelia chinensis	heat-clearing and detoxicating medicinal
603	Glutaricaciduria, type IIB, 231680 (3)	ETFB, MADD	130410	19q13.3	Metabolic	白蘝	白蘝	Ampelopsis japonica	heat-clearing and detoxicating medicinal
603	Glutaricaciduria, type IIC, 231680 (3)	ETFDH, MADD	231675	4q32-qter	Metabolic	土茯苓	土茯苓	Smilax glabra Roxb.	heat-clearing and detoxicating medicinal
604	Glutathione synthetase deficiency, 266130 (3)	GSS, GSHS	601002	20q11.2	Metabolic	大青叶	大青葉	lsatis indigotica	heat-clearing and detoxicating medicinal
607	Glycerol kinase deficiency, 307030 (3)	GK	300474	Xp21.3-p21.2	Metabolic	山豆根	山豆根	Sophora tonkinensis	heat-clearing and detoxicating medicinal
608	Glycine encephalopathy, 605899 (3)	AMT, NKH, GCE	238310	3p21.2-p21.1	Metabolic	四季青	四季青	Ilex chinensis Sims	heat-clearing and detoxicating medicinal
608	Glycine encephalopathy, 605899 (3)	GCSH, NKH	238330	16q24	Metabolic	板蓝根	板藍根	lsatis indigotica	heat-clearing and detoxicating medicinal
608	Glycine encephalopathy, 605899 (3)	GLDC, HYGN1, GCSP, GCE, NKH	238300	9p22	Metabolic	蚤休	蚤休	Paris polyphylla Smith	heat-clearing and detoxicating medicinal
608	Glycine N-methyltransferase deficiency, 606664 (3)	GNMT	606628	6p12	Metabolic	熊胆	熊膽	Ursus arctos L.	heat-clearing and detoxicating medicinal
610	Glycogen storage disease I (3)	G6PC, G6PT	232200	17q21	Metabolic	熊胆	熊膽	Ursus arctos Linnaeus and Selenarctos thibetanus	heat-clearing and detoxicating medicinal
610	Glycogen storage disease Ib, 232220 (3)	G6PT1	602671	11q23	Metabolic	蒲公英	蒲公英	Taraxacum mongolicum Hand.-Mazz.	heat-clearing and detoxicating medicinal
610	Glycogen storage disease Ic, 232240 (3)	G6PT1	602671	11q23	Metabolic	板蓝根	板藍根	Isatis indigotica	heat-clearing and detoxicating medicinal
610	Glycogen storage disease II, 232300 (3)	GAA	606800	17q25.2-q25.3	Metabolic	白头翁	白頭翁	Pulsatilla chinensis	heat-clearing and detoxicating medicinal
610	Glycogen storage disease IIb, 300257 (3)	LAMP2, LAMPB	309060	Xq24	Metabolic	金荞麦	金蕎麥	Fagopyrum dibotrys	heat-clearing and detoxicating medicinal
610	Glycogen storage disease IIIa (3)	AGL, GDE	232400	1p21	Metabolic	马勃	馬勃	Carpophorum Calvatial Lilacinae	heat-clearing and detoxicating medicinal
610	Glycogen storage disease IIIb (3)	AGL, GDE	232400	1p21	Metabolic	马勃	馬勃	Lasiosphaera fenzlii Reich.	heat-clearing and detoxicating medicinal
610	Glycogen storage disease IV, 232500 (3)	GBE1	607839	3p12	Metabolic	白花蛇舌草	白花蛇舌草	Oldenlandia diffusa	heat-clearing and detoxicating medicinal
610	Glycogen storage disease VI (3)	PYGL	232700	14q21-q22	Metabolic	金银花	金銀花	Lonicera confuse	heat-clearing and detoxicating medicinal
610	Glycogen storage disease VII (3)	PFKM	232800	12q13.3	Metabolic	金银花	金銀花	Lonicera confuse	heat-clearing and detoxicating medicinal
610	Glycogen storage disease, type 0, 240600 (3)	GYS2	138571	12p12.2	Metabolic	金银花	金銀花	Lonicera dasystyla	heat-clearing and detoxicating medicinal
609	Glycogenosis, hepatic, autosomal (3)	PHKG2	172471	16p12.1-p11.2	Metabolic	金银花	金銀花	Lonicera hypoglauca	heat-clearing and detoxicating medicinal
609	Glycogenosis, X-linked hepatic, type I (3)	PHKA2, PHK	306000	Xp22.2-p22.1	Metabolic	金银花	金銀花	Lonicera japonica	heat-clearing and detoxicating medicinal
609	Glycogenosis, X-linked hepatic, type II (3)	PHKA2, PHK	306000	Xp22.2-p22.1	Metabolic	土茯苓	土茯苓	Smilax glabra Roxb	heat-clearing and detoxicating medicinal
614	GM1-gangliosidosis (3)	GLB1	230500	3p21.33	Metabolic	红藤	紅藤	Sargentodoxa cuneata	heat-clearing and detoxicating medicinal
614	GM2-gangliosidosis, AB variant (3)	GM2A	272750	5q31.3-q33.1	Metabolic	穿心莲	穿心蓮	Andrographis paniculata	heat-clearing and detoxicating medicinal
614	GM2-gangliosidosis, several forms, 272800 (3)	HEXA, TSD	606869	15q23-q24	Metabolic	拳蔘	拳蔘	Polygonum bistorta	heat-clearing and detoxicating medicinal
622	GRACILE syndrome, 603358 (3)	BCS1L, FLNMS, GRACILE	603647	2q33	Metabolic	山慈姑	山慈姑	Appendiculate cremastra pseudobulb or Common pleione pseudobulb	heat-clearing and detoxicating medicinal
632	Gyrate atrophy of choroid and retina with ornithinemia, B6 responsive or unresponsive-3	OAT	258870	10q26	Metabolic	山慈姑	山慈姑	Cremastra appendiculata	heat-clearing and detoxicating medicinal
639	Harderoporphyrinuria (3)	CPO	121300	3q12	Metabolic	山慈姑	山慈姑	Pleione bulbocodioides	heat-clearing and detoxicating medicinal
640	HARP syndrome, 607236 (3)	PANK2, NBIA1, PKAN, HARP	606157	20p13-p12.3	Metabolic	山慈姑	山慈姑	Pleione yunnanensis	heat-clearing and detoxicating medicinal
641	Hartnup disorder, 234500 (3)	SLC6A19, HND	608893	5p15	Metabolic	大青叶	大青葉	Isatis indigotica	heat-clearing and detoxicating medicinal
644	HDL deficiency, familial, 604091 (3)	ABCA1, ABC1, HDLDT1, TGD	600046	9q22-q31	Metabolic	射干	射干	Belamcanda chinensis (L.) DC.	heat-clearing and detoxicating medicinal
644	HDL response to hormone replacement, augmented (3)	ESR1, ESR	133430	6q25.1	Metabolic	紫花地丁	紫花地丁	Viola yedoensis	heat-clearing and detoxicating medicinal
649	HELLP syndrome, maternal, of pregnancy (3)	HADHA, MTPA	600890	2p23	Metabolic	马齿苋	馬齒莧	Portulaca oleracea	heat-clearing and detoxicating medicinal
654	Heme oxygenase-1 deficiency (3)	HMOX1	141250	22q12	Metabolic	熊胆	熊膽	Selenarctos thibetanus G. Cuvier	heat-clearing and detoxicating medicinal
657	Hemochromatosis (3)	HFE, HLA-H, HFE1	235200	6p21.3	Metabolic	鱼腥草	魚腥草	Houttuynia cordata	heat-clearing and detoxicating medicinal
657	Hemochromatosis, juvenile, 602390 (3)	HAMP, LEAP1, HEPC, HFE2	606464	19q13	Metabolic	山豆根	山豆根	Sophora subprostrata	heat-clearing and detoxicating medicinal
657	Hemochromatosis, juvenile, digenic, 602390 (3)	HAMP, LEAP1, HEPC, HFE2	606464	19q13	Metabolic	青黛	青黛	Indigo Naturalis	heat-clearing and detoxicating medicinal
657	Hemochromatosis, type 2A, 602390 (3)	HJV, HFE2A	608374	1q21	Metabolic	青黛	青黛	Isatis indigotica	heat-clearing and detoxicating medicinal
657	Hemochromatosis, type 3, 604250 (3)	TFR2, HFE3	604720	7q22	Metabolic	青黛	青黛	Polygonum tinctorium	heat-clearing and detoxicating medicinal
657	Hemochromatosis, type 4, 606069 (3)	SLC40A1, SLC11A3, FPN1, IREG1, HFE4	604653	2q32	Metabolic	鸦胆子	鴉膽子	Brucea javanica	heat-clearing and detoxicating medicinal
4666	Hepatic lipase deficiency (3)	LIPC	151670	15q21-q23	Metabolic	贯众	貫眾	Dryopteris Crassirhizoma	heat-clearing and detoxicating medicinal
677	Hex A pseudodeficiency, 272800 (3)	HEXA, TSD	606869	15q23-q24	Metabolic	漏芦	漏蘆	Rhaponticum uniflorum	heat-clearing and detoxicating medicinal
682	Histidinemia, 235800 (3)	HAL, HSTD	609457	12q22-q23	Metabolic	败醬草	敗醬草	Herba Patriniae	heat-clearing and detoxicating medicinal
686	HMG-CoA lyase deficiency (3)	HMGCL	246450	1pter-p33	Metabolic	白花败醬	白花敗醬	Patrinia villosa	heat-clearing and detoxicating medicinal
686	HMG-CoA synthase-2 deficiency, 605911 (3)	HMGCS2	600234	1p13-p12	Metabolic	黄花败醬	黃花敗醬	Patrinia scabiosaefolia	heat-clearing and detoxicating medicinal
688	Holocarboxylase synthetase deficiency, 253270 (3)	HLCS, HCS	609018	21q22.1	Metabolic	蒲公英	蒲公英	Dandelion	heat-clearing and detoxicating medicinal
697	Homocysteine, total plasma, elevated (3)	CTH	607657	1p31.1	Metabolic	植物蒲公英	植物蒲公英	Taraxacum mongolicum	heat-clearing and detoxicating medicinal
698	Homocystinuria due to MTHFR deficiency, 236250 (3)	MTHFR	607093	1p36.3	Metabolic	碱地蒲公英	鹼地蒲公英	Taraxacum sinicum	heat-clearing and detoxicating medicinal
698	Homocystinuria, B6-responsive and nonresponsive types (3)	CBS	236200	21q22.3	Metabolic	连翘	連翹	Forsythia suspense	heat-clearing and detoxicating medicinal
699	Homocystinuria-megaloblastic anemia, cbl E type, 236270 (3)	MTRR	602568	5p15.3-p15.2	Metabolic	地锦草	地錦草	Creeping Euphorbia	heat-clearing and detoxicating medicinal
704	HPRT-related gout, 300323 (3)	HPRT1, HPRT	308000	Xq26-q27.2	Metabolic	植物地锦	植物地錦	Euphorbia humifusa	heat-clearing and detoxicating medicinal
716	Hyperalphalipoproteinemia, 143470 (3)	CETP	118470	16q21	Metabolic	半边莲	半邊蓮	Lobelia chinensis	heat-clearing and detoxicating medicinal
717	Hyperammonemia with hypoornithinemia, hypocitrullinemia, hypoargininemia, and hypoprolinemia (3)	PYCS, GSAS	138250	10q24.3	Metabolic	白蘝	白蘝	Ampelopsis japonica	heat-clearing and detoxicating medicinal
719	Hyperapobetalipoproteinemia, susceptibility to (3)	PPARA, PPAR	170998	22q12-q13.1	Metabolic	土茯苓	土茯苓	Smilax glabra Roxb.	heat-clearing and detoxicating medicinal
724	Hypercholesterolemia, due to ligand-defective apo B, 144010 (3)	APOB, FLDB	107730	2p24	Metabolic	大青叶	大青葉	lsatis indigotica	heat-clearing and detoxicating medicinal
724	Hypercholesterolemia, familial, 143890 (3)	LDLR, FHC, FH	606945	19p13.2	Metabolic	山豆根	山豆根	Sophora tonkinensis	heat-clearing and detoxicating medicinal
724	Hypercholesterolemia, familial, 3, 603776 (3)	PCSK9, NARC1, HCHOLA3, FH3	607786	1p34.1-p32	Metabolic	四季青	四季青	Ilex chinensis Sims	heat-clearing and detoxicating medicinal
724	Hypercholesterolemia, familial, autosomal recessive, 603813 (3)	ARH, FHCB2, FHCB1	605747	1p36-p35	Metabolic	板蓝根	板藍根	lsatis indigotica	heat-clearing and detoxicating medicinal
724	Hypercholesterolemia, familial, due to LDLR defect, modifier of, 143890 (3)	EPHX2	132811	8p21-p12	Metabolic	蚤休	蚤休	Paris polyphylla Smith	heat-clearing and detoxicating medicinal
724	Hypercholesterolemia, familial, modification of, 143890 (3)	APOA2	107670	1q21-q23	Metabolic	熊胆	熊膽	Ursus arctos L.	heat-clearing and detoxicating medicinal
724	Hypercholesterolemia, susceptibility to, 143890 (3)	GSBS	604088	7p15	Metabolic	熊胆	熊膽	Ursus arctos Linnaeus and Selenarctos thibetanus	heat-clearing and detoxicating medicinal
724	Hypercholesterolemia, susceptibility to, 143890 (3)	ITIH4, PK120, ITIHL1	600564	3p21.2-p14.1	Metabolic	蒲公英	蒲公英	Taraxacum mongolicum Hand.-Mazz.	heat-clearing and detoxicating medicinal
731	Hyperinsulinism, familial, 602485 (3)	GCK	138079	7p15-p13	Metabolic	板蓝根	板藍根	Isatis indigotica	heat-clearing and detoxicating medicinal
732	Hyperinsulinism-hyperammonemia syndrome, 606762 (3)	GLUD1	138130	10q23.3	Metabolic	白头翁	白頭翁	Pulsatilla chinensis	heat-clearing and detoxicating medicinal
736	Hyperlipidemia, familial combined, susceptibility to, 602491 (3)	USF1, HYPLIP1	191523	1q22-q23	Metabolic	金荞麦	金蕎麥	Fagopyrum dibotrys	heat-clearing and detoxicating medicinal
737	Hyperlipoproteinemia, type Ib, 207750 (3)	APOC2	608083	19q13.2	Metabolic	马勃	馬勃	Carpophorum Calvatial Lilacinae	heat-clearing and detoxicating medicinal
737	Hyperlipoproteinemia, type III (3)	APOE, AD2	107741	19q13.2	Metabolic	马勃	馬勃	Lasiosphaera fenzlii Reich.	heat-clearing and detoxicating medicinal
738	Hyperlysinemia, 238700 (3)	AASS	605113	7q31.3	Metabolic	白花蛇舌草	白花蛇舌草	Oldenlandia diffusa	heat-clearing and detoxicating medicinal
739	Hypermethioninemia with deficiency of S-adenosylhomocysteine hydrolase (3)	AHCY, SAHH	180960	20cen-q13.1	Metabolic	金银花	金銀花	Lonicera confuse	heat-clearing and detoxicating medicinal
739	Hypermethioninemia, persistent, autosomal dominant, due to methionine adenosyltransferase I/III deficiency (3)	MAT1A, MATA1, SAMS1	250850	10q22	Metabolic	金银花	金銀花	Lonicera confuse	heat-clearing and detoxicating medicinal
740	Hyperornithinemia-hyperammonemia-homocitrullinemia syndrome, 238970 (3)	SLC25A15, ORNT1, HHH	603861	13q14	Metabolic	金银花	金銀花	Lonicera dasystyla	heat-clearing and detoxicating medicinal
742	Hyperoxaluria, primary, type 1, 259900 (3)	AGXT, SPAT	604285	2q36-q37	Metabolic	金银花	金銀花	Lonicera hypoglauca	heat-clearing and detoxicating medicinal
742	Hyperoxaluria, primary, type II, 260000 (3)	GRHPR, GLXR	604296	9cen	Metabolic	金银花	金銀花	Lonicera japonica	heat-clearing and detoxicating medicinal
746	Hyperphenylalaninemia due to pterin-4a-carbinolamine dehydratase deficiency, 264070 (3)	PCBD, DCOH	126090	10q22	Metabolic	土茯苓	土茯苓	Smilax glabra Roxb	heat-clearing and detoxicating medicinal
746	Hyperphenylalaninemia, mild (3)	PAH, PKU1	261600	12q24.1	Metabolic	红藤	紅藤	Sargentodoxa cuneata	heat-clearing and detoxicating medicinal
749	Hyperprolinemia, type I, 239500 (3)	PRODH, PRODH2, SCZD4	606810	22q11.2	Metabolic	穿心莲	穿心蓮	Andrographis paniculata	heat-clearing and detoxicating medicinal
749	Hyperprolinemia, type II, 239510 (3)	ALDH4A1, ALDH4, P5CDH	606811	1p36	Metabolic	拳蔘	拳蔘	Polygonum bistorta	heat-clearing and detoxicating medicinal
757	Hypertriglyceridemia, one form (3)	APOA1	107680	11q23	Metabolic	山慈姑	山慈姑	Appendiculate cremastra pseudobulb or Common pleione pseudobulb	heat-clearing and detoxicating medicinal
757	Hypertriglyceridemia, susceptibility to, 145750 (3)	APOA5	606368	11q23	Metabolic	山慈姑	山慈姑	Cremastra appendiculata	heat-clearing and detoxicating medicinal
757	Hypertriglyceridemia, susceptibility to, 145750 (3)	LIPI, LPDL, PRED5	609252	21q11.2	Metabolic	山慈姑	山慈姑	Pleione bulbocodioides	heat-clearing and detoxicating medicinal
757	Hypertriglyceridemia, susceptibility to, 145750 (3)	RP1, ORP1	603937	8q11-q13	Metabolic	山慈姑	山慈姑	Pleione yunnanensis	heat-clearing and detoxicating medicinal
761	Hypoaldosteronism, congenital, due to CMO I deficiency, 203400 (3)	CYP11B2	124080	8q21	Metabolic	大青叶	大青葉	Isatis indigotica	heat-clearing and detoxicating medicinal
761	Hypoaldosteronism, congenital, due to CMO II deficiency (3)	CYP11B2	124080	8q21	Metabolic	射干	射干	Belamcanda chinensis (L.) DC.	heat-clearing and detoxicating medicinal
762	Hypoalphalipoproteinemia (3)	APOA1	107680	11q23	Metabolic	紫花地丁	紫花地丁	Viola yedoensis	heat-clearing and detoxicating medicinal
763	Hypobetalipoproteinemia (3)	APOB, FLDB	107730	2p24	Metabolic	马齿苋	馬齒莧	Portulaca oleracea	heat-clearing and detoxicating medicinal
766	Hypoceruloplasminemia, hereditary, 604290 (3)	CP	117700	3q23-q24	Metabolic	熊胆	熊膽	Selenarctos thibetanus G. Cuvier	heat-clearing and detoxicating medicinal
772	Hypoglycemia of infancy, leucine-sensitive, 240800 (3)	ABCC8, SUR, PHHI, SUR1	600509	11p15.1	Metabolic	鱼腥草	魚腥草	Houttuynia cordata	heat-clearing and detoxicating medicinal
772	Hypoglycemia of infancy, persistent hyperinsulinemic, 256450 (3)	ABCC8, SUR, PHHI, SUR1	600509	11p15.1	Metabolic	山豆根	山豆根	Sophora subprostrata	heat-clearing and detoxicating medicinal
777	Hypolactasia, adult type, 223100 (3)	LCT, LAC, LPH	603202	2q21	Metabolic	青黛	青黛	Indigo Naturalis	heat-clearing and detoxicating medicinal
777	Hypolactasia, adult type, 223100 (3)	MCM6	601806	2q21	Metabolic	青黛	青黛	Isatis indigotica	heat-clearing and detoxicating medicinal
782	Hypophosphatasia, childhood, 241510 (3)	ALPL, HOPS, TNSALP	171760	1p36.1-p34	Metabolic	青黛	青黛	Polygonum tinctorium	heat-clearing and detoxicating medicinal
782	Hypophosphatasia, infantile, 241500 (3)	ALPL, HOPS, TNSALP	171760	1p36.1-p34	Metabolic	鸦胆子	鴉膽子	Brucea javanica	heat-clearing and detoxicating medicinal
783	Hypophosphatemia, type III (3)	CLCN5, CLCK2, NPHL2, DENTS	300008	Xp11.22	Metabolic	贯众	貫眾	Dryopteris Crassirhizoma	heat-clearing and detoxicating medicinal
783	Hypophosphatemia, X-linked, 307800 (3)	PHEX, HYP, HPDR1	300550	Xp22.2-p22.1	Metabolic	漏芦	漏蘆	Rhaponticum uniflorum	heat-clearing and detoxicating medicinal
810	Inosine triphosphatase deficiency (3)	ITPA	147520	20p	Metabolic	败醬草	敗醬草	Herba Patriniae	heat-clearing and detoxicating medicinal
814	Insulin resistance, severe, digenic, 604367 (3)	PPARG, PPARG1, PPARG2	601487	3p25	Metabolic	白花败醬	白花敗醬	Patrinia villosa	heat-clearing and detoxicating medicinal
814	Insulin resistance, severe, digenic, 604367 (3)	PPP1R3A, PPP1R3	600917	7q11.23-q21.11	Metabolic	黄花败醬	黃花敗醬	Patrinia scabiosaefolia	heat-clearing and detoxicating medicinal
814	Insulin resistance, susceptibility to (3)	PTPN1, PTP1B	176885	20q13.1-q13.2	Metabolic	蒲公英	蒲公英	Dandelion	heat-clearing and detoxicating medicinal
826	Isovaleric acidemia, 243500 (3)	IVD	607036	15q14-q15	Metabolic	植物蒲公英	植物蒲公英	Taraxacum mongolicum	heat-clearing and detoxicating medicinal
837	Kanzaki disease, 609242 (3)	NAGA	104170	22q11	Metabolic	碱地蒲公英	鹼地蒲公英	Taraxacum sinicum	heat-clearing and detoxicating medicinal
848	Ketoacidosis due to SCOT deficiency (3)	SCOT, OXCT	245050	5p13	Metabolic	连翘	連翹	Forsythia suspense	heat-clearing and detoxicating medicinal
857	L-2-hydroxyglutaric aciduria, 236792 (3)	L2HGDH, C14orf160	609584	14q22.1	Metabolic	地锦草	地錦草	Creeping Euphorbia	heat-clearing and detoxicating medicinal
858	Lactate dehydrogenase-B deficiency (3)	LDHB	150100	12p12.2-p12.1	Metabolic	植物地锦	植物地錦	Euphorbia humifusa	heat-clearing and detoxicating medicinal
859	Lacticacidemia due to PDX1 deficiency, 245349 (3)	PDX1	608769	11p13	Metabolic	半边莲	半邊蓮	Lobelia chinensis	heat-clearing and detoxicating medicinal
869	Lathosterolosis, 607330 (3)	SC5DL, ERG3	602286	11q23.3	Metabolic	白蘝	白蘝	Ampelopsis japonica	heat-clearing and detoxicating medicinal
870	LCHAD deficiency (3)	HADHA, MTPA	600890	2p23	Metabolic	土茯苓	土茯苓	Smilax glabra Roxb.	heat-clearing and detoxicating medicinal
871	Lead poisoning, susceptibility to (3)	ALAD	125270	9q34	Metabolic	大青叶	大青葉	lsatis indigotica	heat-clearing and detoxicating medicinal
884	Lesch-Nyhan syndrome, 300322, (3)	HPRT1, HPRT	308000	Xq26-q27.2	Metabolic	山豆根	山豆根	Sophora tonkinensis	heat-clearing and detoxicating medicinal
902	Lipodystrophy, congenital generalized, type 1, 608594 (3)	AGPAT2, LPAAB, BSCL, BSCL1	603100	9q34.3	Metabolic	四季青	四季青	Ilex chinensis Sims	heat-clearing and detoxicating medicinal
902	Lipodystrophy, congenital generalized, type 2, 269700 (3)	BSCL2, SPG17	606158	11q13	Metabolic	板蓝根	板藍根	lsatis indigotica	heat-clearing and detoxicating medicinal
902	Lipodystrophy, familial partial, 151660 (3)	LMNA, LMN1, EMD2, FPLD, CMD1A, HGPS, LGMD1B	150330	1q21.2	Metabolic	蚤休	蚤休	Paris polyphylla Smith	heat-clearing and detoxicating medicinal
902	Lipodystrophy, familial partial, 151660 (3)	PPARG, PPARG1, PPARG2	601487	3p25	Metabolic	熊胆	熊膽	Ursus arctos L.	heat-clearing and detoxicating medicinal
902	Lipodystrophy, familial partial, with decreased subcutaneous fat of face and neck (3)	PPARGC1A, PPARGC1	604517	4p15.1	Metabolic	熊胆	熊膽	Ursus arctos Linnaeus and Selenarctos thibetanus	heat-clearing and detoxicating medicinal
2903	Lipoid proteinosis, 247100 (3)	ECM1	602201	1q21	Metabolic	蒲公英	蒲公英	Taraxacum mongolicum Hand.-Mazz.	heat-clearing and detoxicating medicinal
906	Lipoprotein lipase deficiency (3)	LPL, LIPD	238600	8p22	Metabolic	夏枯草	夏枯草	Prunella vulgaris	heat-clearing and fire-purging medicinal
914	Lowe syndrome, 309000 (3)	OCRL, LOCR, OCRL1, NPHL2	300535	Xq26.1	Metabolic	栀子	梔子	Gardenia florida	heat-clearing and fire-purging medicinal
916	LPA deficiency, congenital (3)	LPA	152200	6q27	Metabolic	决明子	決明子	Cassia Seed	heat-clearing and fire-purging medicinal
931	Lysinuric protein intolerance, 222700 (3)	SLC7A7, LPI	603593	14q11.2	Metabolic	决明	決明	Cassia obtusifolia L.	heat-clearing and fire-purging medicinal
943	Malonyl-CoA decarboxylase deficiency, 248360 (3)	MLYCD, MCD	606761	16q24	Metabolic	小决明	小決明	Cassia tora L.	heat-clearing and fire-purging medicinal
947	Mannosidosis, alpha-, types I and II, 248500 (3)	MAN2B1, MANB	609458	19cen-q12	Metabolic	芦根	蘆根	Phragmites communis Trin	heat-clearing and fire-purging medicinal
947	Mannosidosis, beta, 248510 (3)	MANBA, MANB1	609489	4q22-q25	Metabolic	谷精草	谷精草	Eriocaulon buergerianum	heat-clearing and fire-purging medicinal
948	Maple syrup urine disease, type Ia, 248600 (3)	BCKDHA, MSUD1	608348	19q13.1-q13.2	Metabolic	密蒙花	密蒙花	Buddleja officinalis	heat-clearing and fire-purging medicinal
948	Maple syrup urine disease, type Ib (3)	BCKDHB, E1B	248611	6p22-p21	Metabolic	青葙子	青葙子	Celosia argentea	heat-clearing and fire-purging medicinal
948	Maple syrup urine disease, type II (3)	DBT, BCATE2	248610	1p31	Metabolic	知母	知母	Anemarrhena asphodeloides	heat-clearing and fire-purging medicinal
948	Maple syrup urine disease, type III, 248600 (3)	DLD, LAD, PHE3	238331	7q31-q32	Metabolic	鸭跖草	鴨跖草	Commelina communis	heat-clearing and fire-purging medicinal
952	Maroteaux-Lamy syndrome, several forms (3)	ARSB, MPS6	253200	5q11-q13	Metabolic	天花粉	天花粉	Trichosanthes kirilowii Maxim.	heat-clearing and fire-purging medicinal
962	McArdle disease, 232600 (3)	PYGM	608455	11q13	Metabolic	决明子	決明子	Cassia tora L	heat-clearing and fire-purging medicinal
991	Mephenytoin poor metabolizer (3)	CYP2C, CYP2C19	124020	10q24.1-q24.3	Metabolic	栀子	梔子	Gardenia jasminoides	heat-clearing and fire-purging medicinal
1001	Methionine adenosyltransferase deficiency, autosomal recessive (3)	MAT1A, MATA1, SAMS1	250850	10q22	Metabolic	淡竹叶	淡竹葉	Lophatherum gracile Brongn.	heat-clearing and fire-purging medicinal
1002	Methylcobalamin deficiency, cblG type, 250940 (3)	MTR	156570	1q43	Metabolic	鸭跖草	鴨跖草	Commelina communis L.	heat-clearing and fire-purging medicinal
1003	Methylmalonate semialdehyde dehydrogenase deficiency (3)	ALDH6A1, MMSDH	603178	14q24.3	Metabolic	黄芩	黃芩	Scutellaria baicalensis	heat-clearing and dampness-drying medicinal
1004	Methylmalonic aciduria, mut(0) type, 251000 (3)	MUT, MCM	609058	6p21	Metabolic	苦蔘	苦蔘	Sophora flavescens	heat-clearing and dampness-drying medicinal
1004	Methylmalonic aciduria, vitamin B12-responsive, 251100 (3)	MMAA	607481	4q31.1-q31.2	Metabolic	黄连	黃連	Coptis chinensis	heat-clearing and dampness-drying medicinal
1004	Methylmalonic aciduria, vitamin B12-responsive, due to defect in synthesis of adenosylcobalamin, cblB complementation type, 251110 (3)	MMAB	607568	12q24	Metabolic	白鲜皮	白鮮皮	Dictamnus dasycarpus	heat-clearing and dampness-drying medicinal
1005	Mevalonicaciduria (3)	MVK, MVLK	251170	12q24	Metabolic	黄柏	黃柏	Phellodendron amurense	heat-clearing and dampness-drying medicinal
1023	Molybdenum cofactor deficiency, type A, 252150 (3)	MOCS1, MOCOD	603707	6p21.3	Metabolic	秦皮	秦皮	Fraxinus rhinchophylla	heat-clearing and dampness-drying medicinal
1023	Molybdenum cofactor deficiency, type B, 252150 (3)	MOCS2, MPTS	603708	5q11	Metabolic	龙胆草	龍膽草	Gentiana scabra	heat-clearing and dampness-drying medicinal
1023	Molybdenum cofactor deficiency, type C, 252150 (3)	GPH, KIAA1385, GEPH	603930	14q24	Metabolic	虎杖	虎杖	Polygonum cuspidatum	heat-clearing and dampness-drying medicinal
1032	Mucolipidosis IIIA, 252600 (3)	GNPTAB, GNPTA	607840	4q21-q23	Metabolic	委陵菜	委陵菜	Potentilla chinensis	heat-clearing and dampness-drying medicinal
1032	Mucolipidosis IIIC, 252605 (3)	GNPTAG	607838	16p	Metabolic	积雪草	積雪草	Centella asiatica	heat-clearing and dampness-drying medicinal
1032	Mucolipidosis IV, 252650 (3)	MCOLN1, ML4	605248	19p13.3-p13.2	Metabolic	黄柏	黃柏	Phellodendron chinense	heat-clearing and dampness-drying medicinal
1033	Mucopolysaccharidosis Ih, 607014 (3)	IDUA, IDA	252800	4p16.3	Metabolic	板蓝根	板藍根	Isatis indigotica	heat-clearing and detoxicating medicinal
1033	Mucopolysaccharidosis Ih/s, 607015 (3)	IDUA, IDA	252800	4p16.3	Metabolic	白头翁	白頭翁	Pulsatilla chinensis	heat-clearing and detoxicating medicinal
1033	Mucopolysaccharidosis II (3)	IDS, MPS2, SIDS	309900	Xq28	Metabolic	夏枯草	夏枯草	Prunella vulgaris	heat-clearing and fire-purging medicinal
1033	Mucopolysaccharidosis Is, 607016 (3)	IDUA, IDA	252800	4p16.3	Metabolic	栀子	梔子	Gardenia florida	heat-clearing and fire-purging medicinal
1033	Mucopolysaccharidosis IVA (3)	GALNS, MPS4A	253000	16q24.3	Metabolic	决明子	決明子	Cassia Seed	heat-clearing and fire-purging medicinal
1033	Mucopolysaccharidosis IVB (3)	GLB1	230500	3p21.33	Metabolic	决明	決明	Cassia obtusifolia L.	heat-clearing and fire-purging medicinal
1033	Mucopolysaccharidosis type IIID, 252940 (3)	GNS, G6S	607664	12q14	Metabolic	小决明	小決明	Cassia tora L.	heat-clearing and fire-purging medicinal
1033	Mucopolysaccharidosis type IX, 601492 (3)	HYAL1	607071	3p21.3-p21.2	Metabolic	芦根	蘆根	Phragmites communis Trin	heat-clearing and fire-purging medicinal
1033	Mucopolysaccharidosis VII (3)	GUSB, MPS7	253220	7q21.11	Metabolic	谷精草	谷精草	Eriocaulon buergerianum	heat-clearing and fire-purging medicinal
9039	Multiple sulfatase deficiency, 272200 (3)	SUMF1, FGE	607939	3p26	Metabolic	密蒙花	密蒙花	Buddleja officinalis	heat-clearing and fire-purging medicinal
1056	Myoglobinuria/hemolysis due to PGK deficiency (3)	PGK1, PGKA	311800	Xq13	Metabolic	青葙子	青葙子	Celosia argentea	heat-clearing and fire-purging medicinal
1067	N-acetylglutamate synthase deficiency, 237310 (3)	NAGS	608300	17q21.31	Metabolic	知母	知母	Anemarrhena asphodeloides	heat-clearing and fire-purging medicinal
1107	Niemann-Pick disease, type A, 257200 (3)	SMPD1, NPD	607608	11p15.4-p15.1	Metabolic	鸭跖草	鴨跖草	Commelina communis	heat-clearing and fire-purging medicinal
1107	Niemann-Pick disease, type B, 607616 (3)	SMPD1, NPD	607608	11p15.4-p15.1	Metabolic	天花粉	天花粉	Trichosanthes kirilowii Maxim.	heat-clearing and fire-purging medicinal
1107	Niemann-Pick disease, type C1, 257220 (3)	NPC1, NPC	607623	18q11-q12	Metabolic	决明子	決明子	Cassia tora L	heat-clearing and fire-purging medicinal
1107	Niemann-pick disease, type C2, 607625 (3)	NPC2, HE1	601015	14q24.3	Metabolic	栀子	梔子	Gardenia jasminoides	heat-clearing and fire-purging medicinal
1107	Niemann-Pick disease, type D, 257220 (3)	NPC1, NPC	607623	18q11-q12	Metabolic	淡竹叶	淡竹葉	Lophatherum gracile Brongn.	heat-clearing and fire-purging medicinal
1118	Norum disease, 245900 (3)	LCAT	606967	16q22.1	Metabolic	鸭跖草	鴨跖草	Commelina communis L.	heat-clearing and fire-purging medicinal
1143	Opremazole poor metabolizer (3)	CYP2C, CYP2C19	124020	10q24.1-q24.3	Metabolic	黄芩	黃芩	Scutellaria baicalensis	heat-clearing and dampness-drying medicinal
1146	Ornithine transcarbamylase deficiency, 311250 (3)	OTC	300461	Xp21.1	Metabolic	苦蔘	苦蔘	Sophora flavescens	heat-clearing and dampness-drying medicinal
1149	Oroticaciduria (3)	UMPS, OPRT	258900	3q13	Metabolic	黄连	黃連	Coptis chinensis	heat-clearing and dampness-drying medicinal
3212	Persistent hyperinsulinemic hypoglycemia of infancy, 256450 (3)	KCNJ11, BIR, PHHI	600937	11p15.1	Metabolic	白鲜皮	白鮮皮	Dictamnus dasycarpus	heat-clearing and dampness-drying medicinal
1216	Phenylketonuria (3)	PAH, PKU1	261600	12q24.1	Metabolic	黄柏	黃柏	Phellodendron amurense	heat-clearing and dampness-drying medicinal
1216	Phenylketonuria due to dihydropteridine reductase deficiency (3)	QDPR, DHPR	261630	4p15.31	Metabolic	秦皮	秦皮	Fraxinus rhinchophylla	heat-clearing and dampness-drying medicinal
1216	Phenylketonuria due to PTS deficiency (3)	PTS	261640	11q22.3-q23.3	Metabolic	龙胆草	龍膽草	Gentiana scabra	heat-clearing and dampness-drying medicinal
1220	Phosphoglycerate dehydrogenase deficiency, 601815 (3)	PHGDH	606879	1q12	Metabolic	虎杖	虎杖	Polygonum cuspidatum	heat-clearing and dampness-drying medicinal
1221	Phosphoribosyl pyrophosphate synthetase-related gout (3)	PRPS1	311850	Xq22-q24	Metabolic	委陵菜	委陵菜	Potentilla chinensis	heat-clearing and dampness-drying medicinal
1222	Phosphorylase kinase deficiency of liver and muscle, autosomal recessive, 261750 (3)	PHKB	172490	16q12-q13	Metabolic	积雪草	積雪草	Centella asiatica	heat-clearing and dampness-drying medicinal
1223	Phosphoserine phosphatase deficiency (3)	PSP	172480	7p15.2-p15.1	Metabolic	黄柏	黃柏	Phellodendron chinense	heat-clearing and dampness-drying medicinal
5233	Placental steroid sulfatase deficiency (3)	STS, ARSC1, ARSC, SSDD	308100	Xp22.32	Metabolic	板蓝根	板藍根	Isatis indigotica	heat-clearing and detoxicating medicinal
1249	Porphyria cutanea tarda (3)	UROD	176100	1p34	Metabolic	白头翁	白頭翁	Pulsatilla chinensis	heat-clearing and detoxicating medicinal
1249	Porphyria variegata, 176200 (3)	HFE, HLA-H, HFE1	235200	6p21.3	Metabolic	夏枯草	夏枯草	Prunella vulgaris	heat-clearing and fire-purging medicinal
1249	Porphyria variegata, 176200 (3)	PPOX	600923	1q22	Metabolic	栀子	梔子	Gardenia florida	heat-clearing and fire-purging medicinal
1249	Porphyria, acute hepatic (3)	ALAD	125270	9q34	Metabolic	决明子	決明子	Cassia Seed	heat-clearing and fire-purging medicinal
1249	Porphyria, acute intermittent (3)	HMBS, PBGD, UPS	176000	11q23.3	Metabolic	决明	決明	Cassia obtusifolia L.	heat-clearing and fire-purging medicinal
1249	Porphyria, acute intermittent, nonerythroid variant (3)	HMBS, PBGD, UPS	176000	11q23.3	Metabolic	小决明	小決明	Cassia tora L.	heat-clearing and fire-purging medicinal
1249	Porphyria, congenital erythropoietic, 263700 (3)	UROS	606938	10q25.2-q26.3	Metabolic	芦根	蘆根	Phragmites communis Trin	heat-clearing and fire-purging medicinal
1249	Porphyria, hepatoerythropoietic (3)	UROD	176100	1p34	Metabolic	谷精草	谷精草	Eriocaulon buergerianum	heat-clearing and fire-purging medicinal
1266	Proguanil poor metabolizer (3)	CYP2C, CYP2C19	124020	10q24.1-q24.3	Metabolic	密蒙花	密蒙花	Buddleja officinalis	heat-clearing and fire-purging medicinal
1271	Propionicacidemia, 606054 (3)	PCCA	232000	13q32	Metabolic	青葙子	青葙子	Celosia argentea	heat-clearing and fire-purging medicinal
1271	Propionicacidemia, 606054 (3)	PCCB	232050	3q21-q22	Metabolic	知母	知母	Anemarrhena asphodeloides	heat-clearing and fire-purging medicinal
1276	Protoporphyria, erythropoietic (3)	FECH, FCE	177000	18q21.3	Metabolic	鸭跖草	鴨跖草	Commelina communis	heat-clearing and fire-purging medicinal
1276	Protoporphyria, erythropoietic, recessive, with liver failure (3)	FECH, FCE	177000	18q21.3	Metabolic	天花粉	天花粉	Trichosanthes kirilowii Maxim.	heat-clearing and fire-purging medicinal
1297	Pyruvate carboxylase deficiency, 266150 (3)	PC	608786	11q13.4-q13.5	Metabolic	决明子	決明子	Cassia tora L	heat-clearing and fire-purging medicinal
1297	Pyruvate dehydrogenase deficiency (3)	PDHA1, PHE1A	312170	Xp22.2-p22.1	Metabolic	栀子	梔子	Gardenia jasminoides	heat-clearing and fire-purging medicinal
1297	Pyruvate dehydrogenase E1-beta deficiency (3)	PDHB	179060	3p13-q23	Metabolic	淡竹叶	淡竹葉	Lophatherum gracile Brongn.	heat-clearing and fire-purging medicinal
1329	Ribose 5-phosphate isomerase deficiency, 608611 (3)	RPIA, RPI	180430	2p11.2	Metabolic	鸭跖草	鴨跖草	Commelina communis L.	heat-clearing and fire-purging medicinal
1346	Salla disease, 604369 (3)	SLC17A5, SIASD, SLD	604322	6q14-q15	Metabolic	黄芩	黃芩	Scutellaria baicalensis	heat-clearing and dampness-drying medicinal
1347	Sandhoff disease, infantile, juvenile, and adult forms, 268800 (3)	HEXB	606873	5q13	Metabolic	苦蔘	苦蔘	Sophora flavescens	heat-clearing and dampness-drying medicinal
1348	Sanfilippo syndrome, type A, 252900 (3)	SGSH, MPS3A, SFMD	605270	17q25.3	Metabolic	黄连	黃連	Coptis chinensis	heat-clearing and dampness-drying medicinal
1348	Sanfilippo syndrome, type B (3)	NAGLU	252920	17q21	Metabolic	白鲜皮	白鮮皮	Dictamnus dasycarpus	heat-clearing and dampness-drying medicinal
1355	Schindler disease, type I, 609241 (3)	NAGA	104170	22q11	Metabolic	黄柏	黃柏	Phellodendron amurense	heat-clearing and dampness-drying medicinal
1355	Schindler disease, type III, 609241 (3)	NAGA	104170	22q11	Metabolic	秦皮	秦皮	Fraxinus rhinchophylla	heat-clearing and dampness-drying medicinal
1377	Sepiapterin reductase deficiency (3)	SPR	182125	2p14-p12	Metabolic	龙胆草	龍膽草	Gentiana scabra	heat-clearing and dampness-drying medicinal
1391	Sialic acid storage disorder, infantile, 269920 (3)	SLC17A5, SIASD, SLD	604322	6q14-q15	Metabolic	虎杖	虎杖	Polygonum cuspidatum	heat-clearing and dampness-drying medicinal
1391	Sialidosis, type I, 256550 (3)	NEU1, NEU, SIAL1	608272	6p21.3	Metabolic	委陵菜	委陵菜	Potentilla chinensis	heat-clearing and dampness-drying medicinal
1391	Sialidosis, type II, 256550 (3)	NEU1, NEU, SIAL1	608272	6p21.3	Metabolic	积雪草	積雪草	Centella asiatica	heat-clearing and dampness-drying medicinal
1392	Sialuria, 269921 (3)	GNE, GLCNE, IBM2, DMRV, NM	603824	9p12-p11	Metabolic	黄柏	黃柏	Phellodendron chinense	heat-clearing and dampness-drying medicinal
1398	Sitosterolemia, 210250 (3)	ABCG5	605459	2p21	Metabolic	板蓝根	板藍根	Isatis indigotica	heat-clearing and detoxicating medicinal
1398	Sitosterolemia, 210250 (3)	ABCG8	605460	2p21	Metabolic	白头翁	白頭翁	Pulsatilla chinensis	heat-clearing and detoxicating medicinal
1400	Sjogren-Larsson syndrome, 270200 (3)	ALDH3A2, ALDH10, SLS, FALDH	609523	17p11.2	Metabolic	赤芍	赤芍	Paeonia lactiflora	heat-clearing and blood-cooling medicinal
1403	Slow acetylation (3)	NAT2, AAC2	243400	8p23.1-p21.3	Metabolic	赤芍	赤芍	Paeonia veitchii	heat-clearing and blood-cooling medicinal
1442	Statins, attenuated cholesterol lowering by (3)	HMGCR	142910	5q13.3-q14	Metabolic	赤芍	赤芍	Radix Paeoniae Rubra	heat-clearing and blood-cooling medicinal
1457	Succinic semialdehyde dehydrogenase deficiency (3)	SSADH	271980	6p22	Metabolic	牡丹皮	牡丹皮	Paeonia moutan	heat-clearing and blood-cooling medicinal
1458	Sucrose intolerance (3)	SI	222900	3q25-q26	Metabolic	生地黄	生地黃	Rehmannia glutinosa	heat-clearing and blood-cooling medicinal
1460	Sulfite oxidase deficiency, 272300 (3)	SUOX	606887	Chr.12	Metabolic	玄蔘	玄蔘	Scrophularia ningpoensis	heat-clearing and blood-cooling medicinal
1473	Tangier disease, 205400 (3)	ABCA1, ABC1, HDLDT1, TGD	600046	9q22-q31	Metabolic	紫草	紫草	Lithospermum erythrorhizon	heat-clearing and blood-cooling medicinal
1477	Tay-Sachs disease, 272800 (3)	HEXA, TSD	606869	15q23-q24	Metabolic	软紫草	軟紫草	Arnebia euchroma	heat-clearing and blood-cooling medicinal
1502	Thymine-uraciluria (3)	DPYD, DPD	274270	1p22	Metabolic	紫草	紫草	Radix Lithospermi	heat-clearing and blood-cooling medicinal
1515	Transaldolase deficiency, 606003 (3)	TALDO1	602063	11p15.5-p15.4	Metabolic	内蒙紫草	內蒙紫草	Arnebia guttata	heat-clearing and blood-cooling medicinal
1526	Trifunctional protein deficiency, type 1 (3)	HADHA, MTPA	600890	2p23	Metabolic	内蒙紫草	內蒙紫草	Arnebia guttata Bunge	heat-clearing and blood-cooling medicinal
1526	Trifunctional protein deficiency, type II (3)	HADHB	143450	2p23	Metabolic	水牛角	水牛角	Bubalus bubalis L.	heat-clearing and blood-cooling medicinal
1540	Tyrosinemia, type I (3)	FAH	276700	15q23-q25	Metabolic	牡丹皮	牡丹皮	Paeonia suffruticosa	heat-clearing and blood-cooling medicinal
1540	Tyrosinemia, type II (3)	TAT	276600	16q22.1-q22.3	Metabolic	青蒿	青蒿	Artemisia annua	deficiency heatclearing medicinal
1540	Tyrosinemia, type III (3)	HPD	276710	12q24-qter	Metabolic	银柴胡	銀柴胡	Stellaria dichotoma	deficiency heatclearing medicinal
1550	Urolithiasis, 2,8-dihydroxyadenine (3)	APRT	102600	16q24.3	Metabolic	地骨皮	地骨皮	Cortex Lycii	deficiency heatclearing medicinal
1550	Urolithiasis, hypophosphatemic (3)	SLC17A2, NPT2	182309	5q35	Metabolic	地骨皮	地骨皮	Lycium chinense	deficiency heatclearing medicinal
1570	VLCAD deficiency, 201475 (3)	ACADVL, VLCAD	609575	17p13	Metabolic	白薇	白薇	Cynanchum atratum	deficiency heatclearing medicinal
1589	Wernicke-Korsakoff syndrome, susceptibility to, 277730 (3)	TKT	606781	3p14.3	Metabolic	白薇	白薇	Cynanchum versicolor	deficiency heatclearing medicinal
1596	Wilson disease, 277900 (3)	ATP7B, WND	606882	13q14.3-q21.1	Metabolic	白薇	白薇	Radix Cynanchi Atrati	deficiency heatclearing medicinal
1603	Wolfram syndrome, 222300 (3)	WFS1, WFRS, WFS, DFNA6	606201	4p16.1	Metabolic	胡黄连	胡黃連	Picrorhiza scrophulariiflora	deficiency heatclearing medicinal
1604	Wolman disease (3)	LIPA	278000	10q24-q25	Metabolic	青蒿	青蒿	Artemisia apiacea Hance	deficiency heatclearing medicinal
1607	Xanthinuria, type I, 278300 (3)	XDH	607633	2p23-p22	Metabolic	银柴胡	銀柴胡	Stellaria dichotoma L. var. lanceolata Bge.	deficiency heatclearing medicinal
10	3-M syndrome, 273750 (3)	CUL7	609577	6p21.1	multiple
13	Aarskog-Scott syndrome (3)	FGD1, FGDY, AAS	305400	Xp11.21	multiple
15	ABCD syndrome, 600501 (3)	EDNRB, HSCR2, ABCDS	131244	13q22	multiple
24	Achalasia-addisonianism-alacrimia syndrome, 231550 (3)	AAAS, AAA	605378	12q13	multiple
32	Acrocallosal syndrome, 200990 (3)	GLI3, PAPA, PAPB, ACLS	165240	7p13	multiple
59	ADULT syndrome, 103285 (3)	TP73L, TP63, KET, EEC3, SHFM4, LMS, RHS	603273	3q27	multiple
71	Alagille syndrome, 118450 (3)	JAG1, AGS, AHD	601920	20p12	multiple
79	Alexander disease, 203450 (3)	GFAP	137780	17q21	multiple
79	Alexander disease, 203450 (3)	NDUFV1, UQOR1	161015	11q13	multiple
183	Bardet-Biedl syndrome 1, 209900 (3)	BBS1	209901	11q13	multiple
183	Bardet-Biedl syndrome 1, modifier of, 209900 (3)	ARL6, BBS3	608845	3p12-q13	multiple
183	Bardet-Biedl syndrome 2, 209900 (3)	BBS2	606151	16q21	multiple
183	Bardet-Biedl syndrome 3, 600151 (3)	ARL6, BBS3	608845	3p12-q13	multiple
183	Bardet-Biedl syndrome 4, 209900 (3)	BBS4	600374	15q22.3-q23	multiple
183	Bardet-Biedl syndrome 5, 209900 (3)	BBS5	603650	2q31	multiple
183	Bardet-Biedl syndrome 6, 209900 (3)	MKKS, HMCS, KMS, MKS, BBS6	604896	20p12	multiple
183	Bardet-Biedl syndrome 8, 209900 (3)	TTC8, BBS8	608132	14q32.1	multiple
183	Bardet-Biedl syndrome, 209900 (3)	BBS7	607590	4q27	multiple
185	Barth syndrome, 302060 (3)	TAZ, EFE2, BTHS, CMD3A, LVNCX	300394	Xq28	multiple
186	Bart-Pumphrey syndrome, 149200 (3)	GJB2, CX26, DFNB1, PPK, DFNA3, KID, HID	121011	13q11-q12	multiple
187	Bartter syndrome, type 1, 601678 (3)	SLC12A1, NKCC2	600839	15q15-q21.1	multiple
187	Bartter syndrome, type 2, 241200 (3)	KCNJ1, ROMK1	600359	11q24	multiple
187	Bartter syndrome, type 3, 607364 (3)	CLCNKB	602023	1p36	multiple
187	Bartter syndrome, type 4, 602522 (3)	BSND	606412	1p31	multiple
187	Bartter syndrome, type 4, digenic, 602522 (3)	CLCNKA	602024	1p36	multiple
187	Bartter syndrome, type 4, digenic, 602522 (3)	CLCNKB	602023	1p36	multiple
2188	Basal cell nevus syndrome, 109400 (3)	PTCH, NBCCS, BCNS, HPE7	601309	9q22.3	multiple
192	Beare-Stevenson cutis gyrata syndrome, 123790 (3)	FGFR2, BEK, CFD1, JWS	176943	10q26	multiple
194	Beckwith-Wiedemann syndrome, 130650 (3)	CDKN1C, KIP2, BWS	600856	11p15.5	multiple
194	Beckwith-Wiedemann syndrome, 130650 (3)	H19, D11S813E, ASM1, BWS	103280	11p15.5	multiple
194	Beckwith-Wiedemann syndrome, 130650 (3)	KCNQ10T1, LIT1	604115	11p15.5	multiple
194	Beckwith-Wiedemann syndrome, 130650 (3)	NSD1, ARA267, STO	606681	5q35	multiple
208	Blau syndrome, 186580 (3)	CARD15, NOD2, IBD1, CD, ACUG, PSORAS1	605956	16q12	multiple
210	Blepharophimosis, epicanthus inversus, and ptosis, type 1, 110100 (3)	FOXL2, BPES, BPES1, PFRK, POF3	605597	3q23	multiple
210	Blepharophimosis, epicanthus inversus, and ptosis, type 2, 110100 (3)	FOXL2, BPES, BPES1, PFRK, POF3	605597	3q23	multiple
218	Borjeson-Forssman-Lehmann syndrome, 301900 (3)	PHF6, BFLS	300414	Xq26.3	multiple
238	Buschke-Ollendorff syndrome, 166700 (3)	LEMD3, MAN1	607844	12q14	multiple
269	Carney complex variant, 608837 (3)	MYH8	160741	17p13.1	multiple
269	Carney complex, type 1, 160980 (3)	PRKAR1A, TSE1, CNC1, CAR	188830	17q23-q24	multiple
292	Cerebrooculofacioskeletal syndrome 214150 (3)	ERCC6, CKN2, COFS, CSB	609413	10q11	multiple
292	Cerebrooculofacioskeletal syndrome, 214150 (3)	ERCC2, EM9	126340	19q13.2-q13.3	multiple
292	Cerebrooculofacioskeletal syndrome, 214150 (3)	ERCC5, XPG	133530	13q33	multiple
303	Char syndrome, 169100 (3)	TFAP2B, CHAR	601601	6p12	multiple
302	CHARGE syndrome, 214800 (3)	CHD7	608892	8q12.1	multiple
304	Chediak-Higashi syndrome, 214500 (3)	CHS1, LYST	606897	1q42.1-q42.2	multiple
320	Choreoathetosis, hypothyroidism, and respiratory distress (3)	TITF1, NKX2A, TTF1	600635	14q13	multiple
326	Chromosome 22q13.3 deletion syndrome, 606232 (3)	PSAP2, PROSAP2, KIAA1650	606230	22q13.3	multiple
328	Chudley-Lowry syndrome, 309490 (3)	ATRX, XH2, XNP, MRXS3, SHS	300032	Xq13	multiple
332	CINCA syndrome, 607115 (3)	CIAS1, C1orf7, FCU, FCAS	606416	1q44	multiple
339	Cockayne syndrome, type A, 216400 (3)	ERCC8, CKN1, CSA	609412	5q12	multiple
339	Cockayne syndrome, type B, 133540 (3)	ERCC6, CKN2, COFS, CSB	609413	10q11	multiple
341	Coffin-Lowry syndrome, 303600 (3)	RPS6KA3, RSK2, MRX19	300075	Xp22.2-p22.1	multiple
342	Cohen syndrome, 216550 (3)	COH1	607817	8q22-q23	multiple
2344	Cold-induced sweating syndrome, 272430 (3)	CRLF1, CISS	604237	19p12	multiple
6350	Combined oxidative phosphorylation deficiency, 609060 (3)	GFM1, EFG1, GFM	606639	3q25.1-q26.2	multiple
351	Complex I, mitochondrial respiratory chain, deficiency of, 252010 (3)	NDUFS6	603848	5pter-p15.33	multiple
351	Complex V, mitochondrial respiratory chain, deficiency of, 604273 (3)	ATPAF2, ATP12	608918	17p11.2	multiple
369	Costello syndrome, 218040 (3)	HRAS	190020	11p15.5	multiple
377	Craniofacial anomalies, empty sella turcica, corneal endothelial changes, and abnormal retinal and auditory bipolar cells (3)	VSX1, RINX, PPCD, PPD, KTCN	605020	20p11.2	multiple
378	Craniofacial-deafness-hand syndrome, 122880 (3)	PAX3, WS1, HUP2, CDHS	606597	2q35	multiple
379	Craniofacial-skeletal-dermatologic dysplasia (3)	FGFR2, BEK, CFD1, JWS	176943	10q26	multiple
384	CRASH syndrome, 303350 (3)	L1CAM, CAML1, HSAS1	308840	Xq28	multiple
389	Crigler-Najjar syndrome, type I, 218800 (3)	UGT1A1, UGT1, GNT1	191740	2q37	multiple
389	Crigler-Najjar syndrome, type II, 606785 (3)	UGT1A1, UGT1, GNT1	191740	2q37	multiple
424	De Sanctis-Cacchione syndrome, 278800 (3)	ERCC6, CKN2, COFS, CSB	609413	10q11	multiple
410	Dejerine-Sottas disease, 145900 (3)	PMP22, CMT1A, CMT1E, DSS	601097	17p11.2	multiple
410	Dejerine-Sottas neuropathy, 145900 (3)	EGR2, KROX20	129010	10q21.1-q22.1	multiple
410	Dejerine-Sottas neuropathy, autosomal recessive, 145900 (3)	PRX, CMT4F	605725	19q13.1-q13.2	multiple
410	Dejerine-Sottas syndrome, 145900 (3)	MPZ, CMT1B, CMTDI3, CHM, DSS	159440	1q22	multiple
432	DiGeorge syndrome, 188400 (3)	TBX1, DGS, CTHM, CAFS, TGA, DORV, VCFS, DGCR	602054	22q11.2	multiple
434	Dilated cardiomyopathy with woolly hair and keratoderma, 605676 (3)	DSP, KPPS2, PPKS2	125647	6p24	multiple
2440	DNA ligase I deficiency (3)	LIG1	126391	19q13.2-q13.3	multiple
445	Down syndrome, risk of, 190685 (3)	MTR	156570	1q43	multiple
449	Duane-radial ray syndrome, 607323 (3)	SALL4, HSAL4	607343	20q13.13-q13.2	multiple
452	Dyggve-Melchior-Clausen disease, 223800 (3)	DYM, FLJ90130, DMC, SMC	607461	18q12-q21.1	multiple
523	Fanconi anemia, complementation group A, 227650 (3)	FANCA, FACA, FA1, FA, FAA	607139	16q24.3	multiple
523	Fanconi anemia, complementation group B, 300514 (3)	FAAP95, FAAP90, FLJ34064, FANCB	300515	Xp22.31	multiple
523	Fanconi anemia, complementation group C (3)	FANCC, FACC	227645	9q22.3	multiple
523	Fanconi anemia, complementation group D1, 605724 (3)	BRCA2, FANCD1	600185	13q12.3	multiple
523	Fanconi anemia, complementation group D2 (3)	FANCD2, FANCD, FACD, FAD	227646	3p25.3	multiple
523	Fanconi anemia, complementation group E (3)	FANCE, FACE	600901	6p22-p21	multiple
523	Fanconi anemia, complementation group F (3)	FANCF	603467	11p15	multiple
523	Fanconi anemia, complementation group G (3)	XRCC9, FANCG	602956	9p13	multiple
523	Fanconi anemia, complementation group J, 609054 (3)	BRIP1, BACH1, FANCJ	605882	17q22	multiple
523	Fanconi anemia, complementation group L (3)	PHF9, FANCL	608111	2p16.1	multiple
523	Fanconi anemia, complementation group M (3)	FANCM, KIAA1596	609644	14q21.3	multiple
530	Fechtner syndrome, 153640 (3)	MYH9, MHA, FTNS, DFNA17	160775	22q11.2	multiple
531	Feingold syndrome, 164280 (3)	MYCN, NMYC, ODED, MODED	164840	2p24.1	multiple
551	Fraser syndrome, 219000 (3)	FRAS1	607830	4q21	multiple
551	Fraser syndrome, 219000 (3)	FREM2	608945	13q13.3	multiple
552	Frasier syndrome, 136680 (3)	WT1	607102	11p13	multiple
618	Goldberg-Shprintzen megacolon syndrome, 609460 (3)	KIAA1279	609367	10q22.1	multiple
630	Guttmacher syndrome, 176305 (3)	HOXA13, HOX1J	142959	7p15-p14.2	multiple
634	Haim-Munk syndrome, 245010 (3)	CTSC, CPPI, PALS, PLS, HMS	602365	11q14.1-q14.3	multiple
638	Hand-foot-uterus syndrome, 140000 (3)	HOXA13, HOX1J	142959	7p15-p14.2	multiple
643	Hay-Wells syndrome, 106260 (3)	TP73L, TP63, KET, EEC3, SHFM4, LMS, RHS	603273	3q27	multiple
670	Hermansky-Pudlak syndrome 7, 203300 (3)	DTNBP1, HPS7	607145	6p22.3	multiple
670	Hermansky-pudlak syndrome, 203300 (3)	HPS5, RU2, KIAA1017	607521	11p15-p13	multiple
670	Hermansky-Pudlak syndrome, 203300 (3)	HPS1	604982	10q23.1	multiple
670	Hermansky-Pudlak syndrome, 203300 (3)	HPS3	606118	3q24	multiple
670	Hermansky-Pudlak syndrome, 203300 (3)	HPS4	606682	22q11.2-q12.2	multiple
670	Hermansky-Pudlak syndrome, 203300 (3)	HPS6, RU	607522	10q24.32	multiple
670	Hermansky-Pudlak syndrome, 608233 (3)	AP3B1, ADTB3A, HPS2	603401	5q14.1	multiple
675	Heterotaxy, visceral, 605376 (3)	CFC1, CRYPTIC, HTX2	605194	2q21.1	multiple
675	Heterotaxy, X-linked visceral, 306955 (3)	ZIC3, HTX1, HTX	300265	Xq26.2	multiple
701	Homozygous 2p16 deletion syndrome, 606407 (3)	SLC3A1, ATR1, D2H, NBAT	104614	2p16.3	multiple
702	Hoyeraal-Hreidarsson syndrome, 300240 (3)	DKC1, DKC	300126	Xq28	multiple
710	Hyalinosis, infantile systemic, 236490 (3)	ANTXR2, CMG2, JHF, ISH	608041	4q21	multiple
792	Hystrix-like ichthyosis with deafness, 602540 (3)	GJB2, CX26, DFNB1, PPK, DFNA3, KID, HID	121011	13q11-q12	multiple
801	Immunodeficiency-centromeric instability-facial anomalies syndrome, 242860 (3)	DNMT3B, ICF	602900	20q11.2	multiple
803	Immunodysregulation, polyendocrinopathy, and enteropathy, X-linked, 304790 (3)	FOXP3, IPEX, AIID, XPID, PIDX	300292	Xp11.23-q13.3	multiple
830	Jervell and Lange-Nielsen syndrome, 220400 (3)	KCNE1, JLNS, LQT5	176261	21q22.1-q22.2	multiple
830	Jervell and Lange-Nielsen syndrome, 220400 (3)	KCNQ1, KCNA9, LQT1, KVLQT1, ATFB1	607542	11p15.5	multiple
831	Joubert syndrome, 213300 (3)	NPHP1, NPH1, SLSN1	607100	2q13	multiple
831	Joubert syndrome-3, 608629 (3)	AHI1	608894	6q23.3	multiple
832	Juberg-Marsidi syndrome, 309590 (3)	ATRX, XH2, XNP, MRXS3, SHS	300032	Xq13	multiple
836	Kallmann syndrome (3)	KAL1, KMS, ADMLX	308700	Xp22.3	multiple
836	Kallmann syndrome 2, 147950 (3)	FGFR1, FLT2, KAL2	136350	8p11.2-p11.1	multiple
840	Kartagener syndrome, 244400 (3)	DNAH11, DNAHC11	603339	Chr.7	multiple
840	Kartagener syndrome, 244400 (3)	DNAH5, HL1, PCD, CILD3	603335	5p15-p14	multiple
840	Kartagener syndrome, 244400 (3)	DNAI1, CILD1, ICS, PCD	604366	9p21-p13	multiple
841	Kenny-Caffey syndrome-1, 244460 (3)	TBCE, KCS, KCS1, HRD	604934	1q42-q43	multiple
843	Keratitis-ichthyosis-deafness syndrome, 148210 (3)	GJB2, CX26, DFNB1, PPK, DFNA3, KID, HID	121011	13q11-q12	multiple
849	Keutel syndrome, 245150 (3)	MGP, NTI	154870	12p13.1-p12.3	multiple
853	Klippel-Trenaunay syndrome, 149000 (3)	VG5Q, HUS84971, FLJ10283	608464	5q13.3	multiple
855	Knobloch syndrome, 267750 (3)	COL18A1, KNO	120328	21q22.3	multiple
868	Laryngoonychocutaneous syndrome, 245660 (3)	LAMA3, LOCS	600805	18q11.2	multiple
880	Leopard syndrome, 151100 (3)	PTPN11, PTP2C, SHP2, NS1	176876	12q24.1	multiple
899	LIG4 syndrome, 606593 (3)	LIG4	601837	13q22-q34	multiple
901	Limb-mammary syndrome, 603543 (3)	TP73L, TP63, KET, EEC3, SHFM4, LMS, RHS	603273	3q27	multiple
945	Mandibuloacral dysplasia with type B lipodystrophy, 608612 (3)	ZMPSTE24, FACE1, STE24, MADB	606480	1p34	multiple
953	Marshall syndrome, 154780 (3)	COL11A1, STL2	120280	1p21	multiple
955	MASA syndrome, 303350 (3)	L1CAM, CAML1, HSAS1	308840	Xq28	multiple
963	McCune-Albright syndrome, 174800 (3)	GNAS, GNAS1, GPSA, POH, PHP1B, PHP1A, AHO	139320	20q13.2	multiple
1014	Miller-Dieker lissencephaly, 247200 (3)	YWHAE, MDCR, MDS	605066	17p13.3	multiple
1016	Mitochondrial complex I deficiency, 252010 (3)	NDUFS1	157655	2q33-q34	multiple
1016	Mitochondrial complex I deficiency, 252010 (3)	NDUFS2	602985	1q23	multiple
1016	Mitochondrial complex I deficiency, 252010 (3)	NDUFS4, AQDQ	602694	5q11.1	multiple
1016	Mitochondrial complex I deficiency, 252010 (3)	NDUFV1, UQOR1	161015	11q13	multiple
1016	Mitochondrial complex III deficiency, 124000 (3)	BCS1L, FLNMS, GRACILE	603647	2q33	multiple
1016	Mitochondrial complex III deficiency, 124000 (3)	UQCRB, UQBP, QPC	191330	8q22	multiple
5016	Mitochondrial DNA depletion syndrome, 251880 (3)	SUCLA2	603921	13q12.2-q13	multiple
5016	Mitochondrial DNA-depletion syndrome, hepatocerebral form, 251880 (3)	DGUOK, DGK	601465	2p13	multiple
7016	Mitochondrial myopathy and sideroblastic anemia, 600462 (3)	PUS1, MLASA	608109	12q24.33	multiple
1016	Mitochondrial respiratory chain complex II deficiency, 252011 (3)	SDHA, SDH2, SDHF	600857	5p15	multiple
1030	Muckle-Wells syndrome, 191900 (3)	CIAS1, C1orf7, FCU, FCAS	606416	1q44	multiple
1036	Mulibrey nanism, 253250 (3)	TRIM37, MUL, KIAA0898	605073	17q22-q23	multiple
1038	Muscle-eye-brain disease, 253280 (3)	POMGNT1, MEB	606822	1p34-p33	multiple
1058	Myoneurogastrointestinal encephalomyopathy syndrome, 603041 (3)	ECGF1	131222	22q13.32-qter	multiple
1070	Nail-patella syndrome with open-angle glaucoma, 137750 (3)	LMX1B, NPS1	602575	9q34.1	multiple
1070	Nail-patella syndrome, 161200 (3)	LMX1B, NPS1	602575	9q34.1	multiple
1077	Naxos disease, 601214 (3)	JUP, DP3, PDGB	173325	17q21	multiple
3079	Neonatal ichthyosis-sclerosing cholangitis syndrome, 607626 (3)	CLDN1, SEMP1	603718	3q28-q29	multiple
1093	Neuroectodermal tumors, supratentorial primitive, with cafe-au-lait spots, 608623 (3)	PMS2, PMSL2, HNPCC4	600259	7p22	multiple
1111	Nijmegen breakage syndrome, 251260 (3)	NBS1, NBS	602667	8q21	multiple
1129	Occipital horn syndrome, 304150 (3)	ATP7A, MNK, MK, OHS	300011	Xq12-q13	multiple
1133	Oculofaciocardiodental syndrome, 300166 (3)	BCOR, KIAA1575, MAA2, ANOP2	300485	Xp11.4	multiple
1142	Opitz G syndrome, type I, 300000 (3)	MID1, OGS1, BBBG1, FXY, OSX	300552	Xp22	multiple
3144	Optic nerve coloboma with renal disease, 120330 (3)	PAX2	167409	10q24.3-q25.1	multiple
1168	Otopalatodigital syndrome, type I, 311300 (3)	FLNA, FLN1, ABPX, NHBP, OPD1, OPD2, FMD, MNS	300017	Xq28	multiple
1168	Otopalatodigital syndrome, type II, 304120 (3)	FLNA, FLN1, ABPX, NHBP, OPD1, OPD2, FMD, MNS	300017	Xq28	multiple
1175	Pallister-Hall syndrome, 146510 (3)	GLI3, PAPA, PAPB, ACLS	165240	7p13	multiple
1184	Papillon-Lefevre syndrome, 245000 (3)	CTSC, CPPI, PALS, PLS, HMS	602365	11q14.1-q14.3	multiple
1191	Parkes Weber syndrome, 608355 (3)	RASA1, GAP, CMAVM, PKWS	139150	5q13.3	multiple
1210	Peroxisomal biogenesis disorder, complementation group 4 (3)	PEX6, PXAAA1, PAF2	601498	6p21.1	multiple
1210	Peroxisomal biogenesis disorder, complementation group 6 (3)	PEX6, PXAAA1, PAF2	601498	6p21.1	multiple
1210	Peroxisome biogenesis factor 12 (3)	PEX12	601758	Chr.17	multiple
3232	Pituitary anomalies with holoprosencephaly-like features (3)	GLI2	165230	2q14	multiple
1246	Popliteal pterygium syndrome, 119500 (3)	IRF6, VWS, LPS, PIT, PPS, OFC6	607199	1q32-q41	multiple
1254	Prader-Willi syndrome, 176270 (3)	NDN	602117	15q11-q13	multiple
1254	Prader-Willi syndrome, 176270 (3)	SNRPN	182279	15q12	multiple
1277	Proud syndrome, 300004 (3)	ARX, ISSX, PRTS, MRXS1, MRX36, MRX54	300382	Xp22.13	multiple
1298	Rabson-Mendenhall syndrome, 262190 (3)	INSR	147670	19p13.2	multiple
1301	Radioulnar synostosis with amegakaryocytic thrombocytopenia, 605432 (3)	HOXA11, HOX1I	142958	7p15-p14.2	multiple
1303	RAPADILINO syndrome, 266280 (3)	RECQL4, RTS, RECQ4	603780	8q24.3	multiple
1305	Rapp-Hodgkin syndrome, 129400 (3)	TP73L, TP63, KET, EEC3, SHFM4, LMS, RHS	603273	3q27	multiple
1325	Rhizomelic chondrodysplasia punctata, type 1, 215100 (3)	PEX7, RCDP1	601757	6q22-q24	multiple
1325	Rhizomelic chondrodysplasia punctata, type 3, 600121 (3)	AGPS, ADHAPS	603051	2q31	multiple
1331	Rieger anomaly (3)	FOXC1, FKHL7, FREAC3	601090	6p25	multiple
1331	Rieger syndrome, 180500 (3)	PITX2, IDG2, RIEG1, RGS, IGDS2	601542	4q25-q26	multiple
1335	Robinow syndrome, autosomal recessive, 268310 (3)	ROR2, BDB1, BDB, NTRKR2	602337	9q22	multiple
1338	Rothmund-Thomson syndrome, 268400 (3)	RECQL4, RTS, RECQ4	603780	8q24.3	multiple
1339	Roussy-Levy syndrome, 180800 (3)	MPZ, CMT1B, CMTDI3, CHM, DSS	159440	1q22	multiple
1339	Roussy-Levy syndrome, 180800 (3)	PMP22, CMT1A, CMT1E, DSS	601097	17p11.2	multiple
1341	Rubenstein-Taybi syndrome, 180849 (3)	CREBBP, CBP, RSTS	600140	16p13.3	multiple
1341	Rubinstein-Taybi syndrome, 180849 (3)	EP300	602700	22q13	multiple
1361	Schwartz-Jampel syndrome, type 1, 255800 (3)	HSPG2, PLC, SJS, SJA, SJS1	142461	1p36.1	multiple
1380	Septooptic dysplasia, 182230 (3)	HESX1, RPX	601802	3p21.2-p21.1	multiple
1386	Shah-Waardenburg syndrome, 277580 (3)	EDN3	131242	20q13.2-q13.3	multiple
1388	Shprintzen-Goldberg syndrome, 182212 (3)	FBN1, MFS1, WMS	134797	15q21.1	multiple
1389	Shwachman-Diamond syndrome, 260400 (3)	SBDS, SDS	607444	7q11	multiple
1397	Simpson-Golabi-Behmel syndrome, type 1, 312870 (3)	GPC3, SDYS, SGBS1	300037	Xq26	multiple
1409	Smith-Fineman-Myers syndrome, 309580 (3)	ATRX, XH2, XNP, MRXS3, SHS	300032	Xq13	multiple
1410	Smith-Lemli-Opitz syndrome, 270400 (3)	DHCR7, SLOS	602858	11q12-q13	multiple
1411	Smith-Magenis syndrome, 182290 (3)	RAI1, SMCR, SMS	607642	17p11.2	multiple
1438	Stapes ankylosis syndrome without symphalangism, 184460 (3)	NOG, SYM1, SYNS1	602991	17q22	multiple
1447	Stickler syndrome, type I, 108300 (3)	COL2A1	120140	12q13.11-q13.2	multiple
1447	Stickler syndrome, type II, 604841 (3)	COL11A1, STL2	120280	1p21	multiple
1447	Stickler syndrome, type III, 184840 (3)	COL11A2, STL3, DFNA13	120290	6p21.3	multiple
1455	Stuve-Wiedemann syndrome/Schwartz-Jampel type 2 syndrome, 601559 (3)	LIFR, STWS, SWS, SJS2	151443	5p13.1	multiple
1465	Sutherland-Haan syndrome-like, 300465 (3)	ATRX, XH2, XNP, MRXS3, SHS	300032	Xq13	multiple
1469	Synostoses syndrome, multiple, 1, 186500 (3)	NOG, SYM1, SYNS1	602991	17q22	multiple
1482	Tetra-amelia, autosomal recessive, 273395 (3)	WNT3, INT4	165330	17q21	multiple
1508	Tietz syndrome, 103500 (3)	MITF, WS2A	156845	3p14.1-p12.3	multiple
1509	Timothy syndrome, 601005 (3)	CACNA1C, CACNL1A1, CCHL1A1, TS	114205	12p13.3	multiple
1514	Townes-Brocks branchiootorenal-like syndrome, 107480 (3)	SALL1, HSAL1, TBS	602218	16q12.1	multiple
1514	Townes-Brocks syndrome, 107480 (3)	SALL1, HSAL1, TBS	602218	16q12.1	multiple
1522	Trichodontoosseous syndrome, 190320 (3)	DLX3, TDO	600525	17q21.3-q22	multiple
1528	Trismus-pseudocomptodactyly syndrome, 158300 (3)	MYH8	160741	17p13.1	multiple
1534	TSC2 angiomyolipomas, renal, modifier of, 191100 (3)	IFNG	147570	12q14	multiple
1534	Tuberous sclerosis-1, 191100 (3)	TSC1, LAM	605284	9q34	multiple
1534	Tuberous sclerosis-2, 191100 (3)	TSC2, LAM	191092	16p13.3	multiple
1543	Ulnar-mammary syndrome, 181450 (3)	TBX3	601621	12q24.1	multiple
1551	Usher syndrome, type 1B (3)	MYO7A, USH1B, DFNB2, DFNA11	276903	11q13.5	multiple
1551	Usher syndrome, type 1C, 276904 (3)	USH1C, DFNB18	605242	11p15.1	multiple
1551	Usher syndrome, type 1D, 601067 (3)	CDH23, USH1D	605516	10q21-q22	multiple
1551	Usher syndrome, type 1F, 602083 (3)	PCDH15, DFNB23	605514	10q21-q22	multiple
1551	Usher syndrome, type 1G, 606943 (3)	SANS, USH1G	607696	17q24-q25	multiple
1551	Usher syndrome, type 2A, 276901 (3)	USH2A	608400	1q41	multiple
1551	Usher syndrome, type 3, 276902 (3)	USH3A, USH3	606397	3q21-q25	multiple
1551	Usher syndrome, type IIC, 605472 (3)	MASS1, VLGR1, KIAA0686, FEB4, USH2C	602851	5q14	multiple
1555	VATER association with hydrocephalus, 276950 (3)	PTEN, MMAC1	601728	10q23.31	multiple
1556	Velocardiofacial syndrome, 192430 (3)	TBX1, DGS, CTHM, CAFS, TGA, DORV, VCFS, DGCR	602054	22q11.2	multiple
1571	Vohwinkel syndrome with ichthyosis, 604117 (3)	LOR	152445	1q21	multiple
1571	Vohwinkel syndrome, 124500 (3)	GJB2, CX26, DFNB1, PPK, DFNA3, KID, HID	121011	13q11-q12	multiple
1574	Waardenburg syndrome, typ IID, 608890 (3)	SNAI2, SLUG, WS2D	602150	8q11	multiple
1574	Waardenburg syndrome, type I, 193500 (3)	PAX3, WS1, HUP2, CDHS	606597	2q35	multiple
1574	Waardenburg syndrome, type IIA, 193510 (3)	MITF, WS2A	156845	3p14.1-p12.3	multiple
1574	Waardenburg syndrome, type III, 148820 (3)	PAX3, WS1, HUP2, CDHS	606597	2q35	multiple
1574	Waardenburg syndrome/albinism, digenic, 103470 (3)	TYR	606933	11q14-q21	multiple
1574	Waardenburg syndrome/ocular albinism, digenic, 103470 (3)	MITF, WS2A	156845	3p14.1-p12.3	multiple
1573	Waardenburg-Shah syndrome, 277580 (3)	EDNRB, HSCR2, ABCDS	131244	13q22	multiple
1573	Waardenburg-Shah syndrome, 277580 (3)	SOX10, WS4	602229	22q13	multiple
1576	WAGR syndrome, 194072 (3)	WT1	607102	11p13	multiple
1578	Walker-Warburg syndrome, 236670 (3)	FCMD	607440	9q31	multiple
1578	Walker-Warburg syndrome, 236670 (3)	POMT1	607423	9q34.1	multiple
1578	Warburg micro syndrome 1, 600118 (3)	RAB3GAP, WARBM1, P130	602536	2q21.3	multiple
1588	Werner syndrome, 277700 (3)	RECQL2, RECQ3, WRN	604611	8p12-p11.2	multiple
1594	Williams-Beuren syndrome, 194050 (3)	ELN	130160	7q11.2	multiple
1614	Yemenite deaf-blind hypopigmentation syndrome, 601706 (3)	SOX10, WS4	602229	22q13	multiple
1615	Zellweger syndrome, 214100 (3)	PEX10, NALD	602859	Chr.1	multiple
1615	Zellweger syndrome, 214100 (3)	PEX13, ZWS, NALD	601789	2p15	multiple
1615	Zellweger syndrome, 214100 (3)	PEX14	601791	1p36.2	multiple
1615	Zellweger syndrome, 214100 (3)	PEX26	608666	22q11.21	multiple
1615	Zellweger syndrome, 214100 (3)	PXF, HK33, D1S2223E, PEX19	600279	1q22	multiple
1615	Zellweger syndrome, 214100 (3)	PXR1, PEX5, PTS1R	600414	12p13.3	multiple
1615	Zellweger syndrome, complementation group 9 (3)	PEX16	603360	11p12-p11.2	multiple
1615	Zellweger syndrome, complementation group G, 214100 (3)	PEX3	603164	6q23-q24	multiple
1615	Zellweger syndrome-1, 214100 (3)	PEX1, ZWS1	602136	7q21-q22	multiple
1615	Zellweger syndrome-2 (3)	ABCD3, PXMP1, PMP70	170995	1p22-p21	multiple
1615	Zellweger syndrome-3 (3)	PXMP3, PAF1, PMP35, PEX2	170993	8q21.1	multiple
1617	Zlotogora-Ogur syndrome, 225000 (3)	HVEC, PVRL1, PVRR1, PRR1	600644	11q23-q24	multiple
88	Alpha-actinin-3 deficiency (3)	ACTN3	102574	11q13-q14	Muscular	荷叶	荷葉	Nelumbo nucifera	dampness-resolving medicinal
193	Becker muscular dystrophy modifier, 310200 (3)	MYF6	159991	12q21	Muscular	白豆蔻	白豆蔻	Amomum kravanh	dampness-resolving medicinal
193	Becker muscular dystrophy, 300376 (3)	DMD, BMD	300377	Xp21.2	Muscular	厚朴	厚朴	Magnolia officinalis	dampness-resolving medicinal
200	Bethlem myopathy, 158810 (3)	COL6A1, OPLL	120220	21q22.3	Muscular	厚朴	厚朴	Magnolia officinalis Rehd	dampness-resolving medicinal
200	Bethlem myopathy, 158810 (3)	COL6A2	120240	21q22.3	Muscular	草豆蔻	草豆蔻	Alpinia katsumadai	dampness-resolving medicinal
200	Bethlem myopathy, 158810 (3)	COL6A3	120250	2q37	Muscular	广霍香	廣霍香	Pogostemon cablin	dampness-resolving medicinal
231	Brody myopathy, 601003 (3)	ATP2A1, SERCA1	108730	16p12	Muscular	草果	草果	Amomum tsao-ko Crevost	dampness-resolving medicinal
2287	Central core disease, 117000 (3)	RYR1, MHS, CCO	180901	19q13.1	Muscular	苍术	蒼朮	Atractylodes lancea	dampness-resolving medicinal
2287	Central core disease, one form (3) ()	MYH7, CMH1, MPD1	160760	14q12	Muscular	佩兰	佩蘭	Eupatorium fortunei	dampness-resolving medicinal
376	Cramps, familial, potassium-aggravated (3)	SCN4A, HYPP, NAC1A	603967	17q23.1-q25.3	Muscular	砂仁	砂仁	Villous amomum fruit	dampness-resolving medicinal
451	Duchenne muscular dystrophy, 310200 (3)	DMD, BMD	300377	Xp21.2	Muscular	绿壳砂仁	綠殼砂仁	Amomum xanthioides	dampness-resolving medicinal
471	Elite sprint athletic performance (3)	ACTN3	102574	11q13-q14	Muscular	白豆蔻	白豆蔻	Amomum kravanh Pierre ex Gagnep.	dampness-resolving medicinal
[truncated: 1,375 more rows]
